# Supplementary material
Source: publisher figshare collection journal article supplement (https://acs.figshare.com/ndownloader/files/15086858)
Supplement: Supplementary file 1 [file 15086858]

# Catalytic C–H Amination Mediated by Dipyrrin Cobalt Imidos

Yunjung Baek and Theodore A. Betley\*

*Department of Chemistry and Chemical Biology*

*Harvard University*

*12 Oxford Street, Cambridge, Massachusetts 02138*

|                                                                                                                                                                                  | Page |
|----------------------------------------------------------------------------------------------------------------------------------------------------------------------------------|------|
| <b>General Considerations.</b> .....                                                                                                                                             | 5    |
| <b>Characterization and Physical Measurements</b> .....                                                                                                                          | 6    |
| <b>Metal Complexes Syntheses.</b> .....                                                                                                                                          | 7    |
| <b>Organoazide Syntheses</b> .....                                                                                                                                               | 10   |
| <b>Mechanistic Studies.</b> .....                                                                                                                                                | 20   |
| <b>Figure S-1.</b> Rate of formation of <b>9</b> (mM/min) versus concentrations of imido <b>8</b> (mM).....                                                                      | 21   |
| <b>Table S-1.</b> Averages and standard errors for the observed initial rates with varying concentrations of imido .....                                                         | 21   |
| <b>Figure S-2.</b> Rate of formation of <b>9</b> (mM/min) versus concentrations of azide <b>7</b> (mM).....                                                                      | 22   |
| <b>Table S-2.</b> Averages and standard errors of the observed initial rates with varying concentrations of azide.....                                                           | 22   |
| <b>Figure S-3.</b> Proposed catalytic cycle in the absence of pyridine .....                                                                                                     | 23   |
| <b>Figure S-4.</b> Formation of cobalt tetrazido complex as a function of [pyridine- <i>d</i> <sub>5</sub> ].....                                                                | 24   |
| <b>Table S-3.</b> Averages and standard errors of the rates at 50% formation of the cobalt tetrazido complex <b>11</b> as a function of [pyridine- <i>d</i> <sub>5</sub> ] ..... | 25   |
| <b>Figure S-5.</b> Rate of formation of <b>9</b> (mM/min) versus [pyridine- <i>d</i> <sub>5</sub> ] (mM) .....                                                                   | 26   |
| <b>Table S-4.</b> Averages and standard errors of the observed initial rates of amination as a function of [pyridine- <i>d</i> <sub>5</sub> ] .....                              | 26   |
| <b>Figure S-6.</b> Job plot obtained at 25 °C in benzene- <i>d</i> <sub>6</sub> with [ <b>10</b> ] + [pyridine] = 4.25 mM .....                                                  | 27   |
| <b>Table S-5.</b> Chemical shifts (ppm) of <b>10</b> as a function of [pyridine] at 25 °C in benzene- <i>d</i> <sub>6</sub> .....                                                | 27   |
| <b>Figure S-7.</b> <sup>1</sup> H NMR titration curves of <b>10</b> with substituted pyridines.....                                                                              | 28   |
| <b>Table S-6.</b> Calculated binding constants ( <i>K</i> <sub>a</sub> ) for 4-substituted pyridines using a nonlinear regression fit to a 1:1 complexation model.....           | 29   |

|                                                                                                                                                                |    |
|----------------------------------------------------------------------------------------------------------------------------------------------------------------|----|
| <b>Table S-7.</b> Averages and standard errors for the observed initial rates of C–H amination in the presence of substituted pyridines .....                  | 30 |
| <b>Figure S-8.</b> Intermolecular KIE at 50 °C in benzene- <i>d</i> <sub>6</sub> .....                                                                         | 31 |
| <b>Figure S-9.</b> Intermolecular KIE at 25 °C in benzene- <i>d</i> <sub>6</sub> with [pyridine] = 42.5 mM .....                                               | 32 |
| <b>Figure S-10.</b> <sup>1</sup> H NMR spectra showing the distributions of P <sub>H</sub> and P <sub>D</sub> .....                                            | 33 |
| <b>Figure S-11.</b> <sup>1</sup> H NMR spectra showing the distributions of P <sub>H</sub> and P <sub>D</sub> .....                                            | 34 |
| <b>Table S-8.</b> Averages and standard errors of the observed initial rates for <i>para</i> -substituted azide substrates .....                               | 35 |
| <b>Figure S-12.</b> Free-energy correlation of log( <i>k</i> <sub>rel</sub> ) vs. σ <sup>+</sup> .....                                                         | 35 |
| <b>Figure S-13.</b> Linear-free-energy correlation of log( <i>k</i> <sub>rel</sub> ) vs. (σ <sub>mb</sub> and σ <sub>JJ</sub> ) .....                          | 36 |
| <b>Figure S-14.</b> Solution magnetic moments of a mixture of <b>10</b> and <b>10-(4-Me<sub>2</sub>Npy)</b> as a function of [4-Me <sub>2</sub> Npy] .....     | 37 |
| <b>Characterization of Substituted Pyrrolidines.</b> .....                                                                                                     | 38 |
| <b><sup>1</sup>H NMR Spectra of Metal Compounds.</b> .....                                                                                                     | 40 |
| <b>Figure S-15.</b> <sup>1</sup> H NMR spectra of a series of cobalt alkyl imidos in benzene- <i>d</i> <sub>6</sub> .....                                      | 40 |
| <b>Figure S-16.</b> Variable temperature <sup>1</sup> H NMR spectra of imido complex <b>3</b> in toluene- <i>d</i> <sub>8</sub> .....                          | 40 |
| <b>Figure S-17.</b> <sup>1</sup> H NMR spectra of a series of cobalt tetrazido complexes in benzene- <i>d</i> <sub>6</sub> .....                               | 41 |
| <b>Figure S-18.</b> <sup>1</sup> H NMR spectra of ( <sup>Ar</sup> L)Co(py) and ( <sup>Ar</sup> L)Co <b>2</b> in benzene- <i>d</i> <sub>6</sub> .....           | 41 |
| <b>Figure S-19.</b> <sup>1</sup> H NMR spectra of ( <sup>Ar</sup> L)Co(py) and ( <sup>Ar</sup> L)Co(py) <sub>2</sub> .....                                     | 42 |
| <b>NMR Spectra of Organoazides and Substituted Pyrrolidines.</b> .....                                                                                         | 43 |
| <b>Figure S-20.</b> <sup>1</sup> H NMR spectrum of 2-azido-2-methylhexane in chloroform- <i>d</i> .....                                                        | 43 |
| <b>Figure S-21.</b> <sup>13</sup> C{ <sup>1</sup> H} NMR spectrum of 2-azido-2-methylhexane in chloroform- <i>d</i> .....                                      | 43 |
| <b>Figure S-22.</b> <sup>1</sup> H NMR spectrum of 2-azido-2,5-dimethylhexane in chloroform- <i>d</i> .....                                                    | 44 |
| <b>Figure S-23.</b> <sup>13</sup> C{ <sup>1</sup> H} NMR spectrum of 2-azido-2,5-dimethylhexane in chloroform- <i>d</i> .....                                  | 44 |
| <b>Figure S-24.</b> <sup>1</sup> H NMR spectrum of (4-azido-4-methylpentyl)benzene in chloroform- <i>d</i> .....                                               | 45 |
| <b>Figure S-25.</b> <sup>13</sup> C{ <sup>1</sup> H} NMR spectrum of (4-azido-4-methylpentyl)benzene in chloroform- <i>d</i> ....                              | 45 |
| <b>Figure S-26.</b> <sup>1</sup> H NMR spectrum of (4-azido-4-methylpentyl-1,1- <i>d</i> <sub>2</sub> )benzene in chloroform- <i>d</i> ..                      | 46 |
| <b>Figure S-27.</b> <sup>13</sup> C{ <sup>1</sup> H} NMR spectrum of (4-azido-4-methylpentyl-1,1- <i>d</i> <sub>2</sub> )benzene in chloroform- <i>d</i> ..... | 46 |
| <b>Figure S-28.</b> <sup>1</sup> H NMR spectrum of (4-azido-4-methylpentyl-1- <i>d</i> )benzene in chloroform- <i>d</i> .....                                  | 47 |
| <b>Figure S-29.</b> <sup>13</sup> C{ <sup>1</sup> H} NMR spectrum of (4-azido-4-methylpentyl-1- <i>d</i> )benzene in chloroform- <i>d</i> .....                | 47 |
| <b>Figure S-30.</b> <sup>1</sup> H NMR spectrum of 1-(4-azido-4-methylpentyl)-4-methylbenzene in chloroform- <i>d</i> .....                                    | 48 |
| <b>Figure S-32.</b> <sup>1</sup> H NMR spectrum of 1-(4-azido-4-methylpentyl)-4-methoxybenzene in chloroform- <i>d</i> .....                                   | 49 |

|                                                                                                                                                                                                                                                        |    |
|--------------------------------------------------------------------------------------------------------------------------------------------------------------------------------------------------------------------------------------------------------|----|
| <b>Figure S-33.</b> $^{13}\text{C}\{^1\text{H}\}$ NMR spectrum of 1-(4-azido-4-methylpentyl)-4-methoxybenzene in chloroform- <i>d</i> .....                                                                                                            | 49 |
| <b>Figure S-34.</b> $^1\text{H}$ NMR spectrum of 1-(4-azido-4-methylpentyl)-4-(trifluoromethyl)benzene in chloroform- <i>d</i> .....                                                                                                                   | 50 |
| <b>Figure S-35.</b> $^{13}\text{C}\{^1\text{H}\}$ NMR spectrum of 1-(4-azido-4-methylpentyl)-4-(trifluoromethyl)benzene in chloroform- <i>d</i> .....                                                                                                  | 50 |
| <b>Figure S-36.</b> $^1\text{H}$ NMR spectrum of 2,2-dimethyl-5-phenylpyrrolidine in chloroform- <i>d</i> .....                                                                                                                                        | 51 |
| <b>Figure S-37.</b> $^{13}\text{C}\{^1\text{H}\}$ NMR spectrum of 2,2-dimethyl-5-phenylpyrrolidine in chloroform- <i>d</i> ....                                                                                                                        | 51 |
| <b>Figure S-38.</b> $^1\text{H}$ NMR spectrum of 2,2-dimethyl-5-( <i>p</i> -tolyl)pyrrolidine in chloroform- <i>d</i> .....                                                                                                                            | 52 |
| <b>Figure S-39.</b> $^{13}\text{C}\{^1\text{H}\}$ NMR spectrum of 2,2-dimethyl-5-( <i>p</i> -tolyl)pyrrolidine in chloroform- <i>d</i> .                                                                                                               | 52 |
| <b>Figure S-40.</b> $^1\text{H}$ NMR spectrum of 5-(4-methoxyphenyl)-2,2-dimethylpyrrolidine in chloroform- <i>d</i> .....                                                                                                                             | 53 |
| <b>Figure S-41.</b> $^{13}\text{C}\{^1\text{H}\}$ NMR spectrum of 5-(4-methoxyphenyl)-2,2-dimethylpyrrolidine in chloroform- <i>d</i> .....                                                                                                            | 53 |
| <b>Figure S-42.</b> $^1\text{H}$ NMR spectrum of 2,2-dimethyl-5-(4-(trifluoromethyl)phenyl)pyrrolidine in chloroform- <i>d</i> .....                                                                                                                   | 54 |
| <b>Figure S-43.</b> $^{13}\text{C}\{^1\text{H}\}$ NMR spectrum of 2,2-dimethyl-5-(4-(trifluoromethyl)phenyl)pyrrolidine in chloroform- <i>d</i> .....                                                                                                  | 54 |
| <b>X-Ray Diffraction Techniques</b> .....                                                                                                                                                                                                              | 55 |
| <b>Table S-9.</b> X-ray diffraction experimental details <sup>a,b</sup> .....                                                                                                                                                                          | 57 |
| <b>Figure S-44.</b> Solid-state molecular structure for ( <sup>Ar</sup> L)CoBr ( <b>1</b> ) .....                                                                                                                                                      | 59 |
| <b>Figure S-45.</b> Solid-state molecular structure for ( <sup>Ar</sup> L)Co ( <b>2</b> ) .....                                                                                                                                                        | 60 |
| <b>Figure S-46.</b> Solid-state molecular structure for ( <sup>Ar</sup> L)Co(NR'), R' = C(CH <sub>3</sub> ) <sub>2</sub> (CH <sub>2</sub> ) <sub>3</sub> CH <sub>3</sub> ( <b>3</b> ) ...                                                              | 61 |
| <b>Figure S-47.</b> Solid-state molecular structure for ( <sup>Ar</sup> L)Co(NR'), R' = C(CH <sub>3</sub> ) <sub>2</sub> (CH <sub>2</sub> ) <sub>2</sub> CH(CH <sub>3</sub> ) <sub>2</sub> ( <b>4</b> ) .....                                          | 62 |
| <b>Figure S-48.</b> Solid-state molecular structure for ( <sup>Ar</sup> L)Co(NAd) ( <b>10</b> ) .....                                                                                                                                                  | 63 |
| <b>Figure S-49.</b> Solid-state molecular structure for ( <sup>Ar</sup> L)Co( $\kappa^2$ -N <sub>4</sub> R' <sub>2</sub> ), R' = C(CH <sub>3</sub> ) <sub>2</sub> (CH <sub>2</sub> ) <sub>3</sub> CH <sub>3</sub> ( <b>5</b> ) .....                   | 64 |
| <b>Figure S-50.</b> Solid-state molecular structure for ( <sup>Ar</sup> L)Co( $\kappa^2$ -N <sub>4</sub> R' <sub>2</sub> ), R' = C(CH <sub>3</sub> ) <sub>2</sub> (CH <sub>2</sub> ) <sub>2</sub> CH(CH <sub>3</sub> ) <sub>2</sub> ( <b>6</b> ) ..... | 65 |
| <b>Figure S-51.</b> Solid-state molecular structure for ( <sup>Ar</sup> L)Co( $\kappa^2$ -N <sub>4</sub> Ad <sub>2</sub> ) ( <b>11</b> ) .....                                                                                                         | 66 |
| <b>Computational Methods</b> .....                                                                                                                                                                                                                     | 67 |
| <b>Table S-10.</b> Summary of the geometry optimized results of <b>10-py</b> .....                                                                                                                                                                     | 67 |
| <b>Figure S-52.</b> Geometry optimized molecular structure of <b>10-py</b> with an <i>S</i> = 0 spin state .....                                                                                                                                       | 68 |
| <b>Figure S-53.</b> Geometry optimized molecular structure of <b>10-py</b> with an <i>S</i> = 1 spin state .....                                                                                                                                       | 69 |
| <b>Figure S-54.</b> Geometry optimized molecular structure of <b>10-py</b> with an <i>S</i> = 2 spin state .....                                                                                                                                       | 70 |

|                                                                                                                             |    |
|-----------------------------------------------------------------------------------------------------------------------------|----|
| <b>Figure S-55.</b> Frontier molecular orbital diagram of <b>10-py</b> primarily based on Co at an $S = 2$ spin state. .... | 71 |
| <b>Table S-11.</b> Coordinates of optimized molecular structure for ( $^{\text{ArL}}$ )Co(NAd) ( <b>10</b> ) .....          | 72 |
| <b>Table S-12.</b> Coordinates of optimized molecular structure for ( $^{\text{ArL}}$ )Co(py)(NAd) ( <b>10-py</b> ) .....   | 74 |
| <b>Table S-13.</b> Coordinates of optimized molecular structure for ( $^{\text{ArL}}$ )Co(py)(NAd) ( <b>10-py</b> ) .....   | 78 |
| <b>Table S-14.</b> Coordinates of optimized molecular structure for ( $^{\text{ArL}}$ )Co(py)(NAd) ( <b>10-py</b> ) .....   | 81 |

## General Considerations.

All manipulations of metal complexes were carried out in the absence of water and dioxygen using standard Schlenk techniques, or in an MBraun inert atmosphere drybox under a dinitrogen atmosphere. Ligand and ligand precursors were synthesized as previously reported.<sup>1</sup> All glassware was oven dried for a minimum of 1 hour and cooled in an evacuated antechamber prior to use in the drybox. Benzene, *n*-hexane, toluene, and dichloromethane were dried over 4 Å molecular sieves (Strem) prior to use. Chloroform-*d* and deuterium oxide (D<sub>2</sub>O) were purchased from Cambridge Isotope Labs and used as received. Benzene-*d*<sub>6</sub> and pyridine-*d*<sub>5</sub> were purchased from Cambridge Isotope Labs and were degassed and stored over 4 Å molecular sieves prior to use. Methylmagnesium bromide solution (3.0 M in diethyl ether), isopropylmagnesium chloride lithium chloride complex solution (1.3 M in THF), azidotrimethylsilane, palladium on carbon (10 wt%), benzaldehyde, trimethylamine, thionyl chloride, sodium borodeuteride, chlorodiphenylphosphine, 4-iodobenzotrifluoride, methyl-3-butenolate, tri(*o*-tolyl)phosphine, 4-phenylbutanoic acid, 4-(*p*-tolyl)butanoic acid, 4-(4-methoxyphenyl)butanoic acid, and 2-methylhexan-2-ol were purchased from Aldrich and used as received. 2,5-dimethylhexan-2-ol and 3-methyl-3-trimethylsiloxy-1-butyne were purchased from Alfa Aesar and used as received. Boron trifluoride diethyl etherate, palladium(II) acetate, and cobalt(III) acetylacetonate were purchased from Strem and used as received. Methoxybenzoquinone (MBQ) was purchased from TCI-America and used as received. Pyridine, 4-*tert*-butylpyridine and 4-trifluoromethylpyridine were purchased from Aldrich, degassed and stored over 4 Å molecular sieves prior to use. 4-Dimethylaminopyridine was purchased from Aldrich and recrystallized from toluene prior to use. Anhydrous cobalt(II) bromide was purchased from Aldrich and used as received. Celite® 545 (J. T. Baker) was dried in a Schlenk flask for 24 h under dynamic vacuum while heating to at least 150 °C prior to use in a drybox. Silica gel 32-63 μ (AIC, Framingham, MA) was used as received.

---

<sup>1</sup> King, E.R.; Hennessy, E.T.; Betley, T.A. *J. Am. Chem. Soc.* **2011**, *136*, 10940

### **Characterization and Physical Measurements.**

$^1\text{H}$  and  $^{13}\text{C}$  NMR spectra were recorded on Varian Unity/Inova 500 MHz- or Agilent DD2 600 MHz spectrometers.  $^1\text{H}$  and  $^{13}\text{C}$  NMR chemical shifts are reported relative to  $\text{SiMe}_4$  using the chemical shift of residual solvent peaks as reference. Gas chromatography/mass spectrometry (GC/MS) was performed on an Agilent GC/MS 5975 Turbo system. High-resolution mass spectrometry was performed on a Bruker microTOFII ESI LCMS. Elemental analyses (%CHN) were obtained on a PerkinElmer 2400 Series II CHNS/O Analyzer.

## Metal Complexes Syntheses.

### A. Synthesis of cobalt synthons.

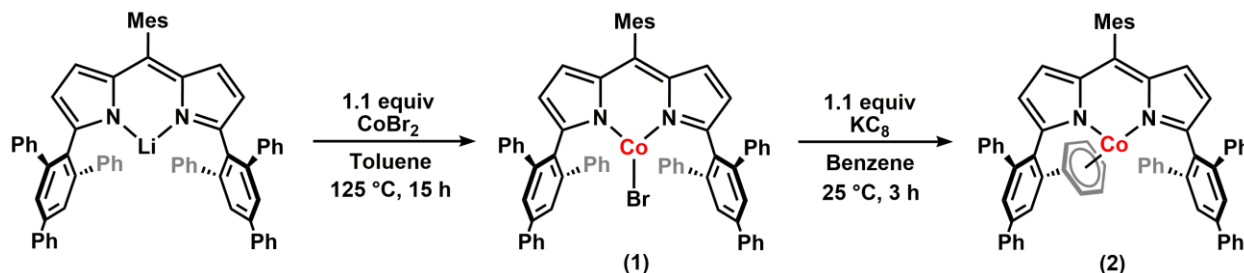

**( $^{\text{Ar}}\text{L}$ )CoBr, (1):** In an oven-dried 50 mL pressure vessel, ( $^{\text{Ar}}\text{L}$ )Li (0.5 g, 0.57 mmol) and  $\text{CoBr}_2$  (0.137 g, 0.627 mmol, 1.10 equiv) were dissolved in 20 mL toluene and stirred for 15 hours at  $125^\circ\text{C}$ . The dark maroon mixture was filtered through a coarse glass frit with Celite to remove lithium chloride and excess cobalt. The Celite was washed with an additional 20 mL benzene. The collected filtrate was frozen and benzene was removed by sublimation *in vacuo* to afford **1** as a maroon powder (0.52 g, 90%). Crystals suitable for X-ray diffraction were grown from a 2:1 *n*-hexane/benzene mixture at  $-35^\circ\text{C}$ .  $^1\text{H}$  NMR (600 MHz, 295 K,  $\text{C}_6\text{D}_6$ ):  $\delta$ /ppm 94.31, 91.62, 26.23, 24.02, 18.59, 13.83, 13.27, 12.64, 12.41, 2.12,  $-27.85$ ,  $-36.76$ ,  $-41.50$ . Anal. Calc. for  $\text{C}_{66}\text{H}_{49}\text{ClCoN}_2$ : C 82.19, H 5.12, N 2.90; Found: C 81.89, H 5.29, N 2.95.

**( $^{\text{Ar}}\text{L}$ )Co, (2):** In a 20 mL vial, **1** (0.5 g, 0.496 mmol) was dissolved in 10 mL of benzene and added to a frozen benzene solution of potassium graphite ( $\text{KC}_8$ , 0.074 g, 0.545 mmol, 1.1 equiv). The reaction mixture was slowly warmed up to room temperature and stirred for 3 hours at room temperature. The dark purple mixture was filtered through a coarse glass frit with Celite. The Celite was washed with an additional 20 mL benzene. The collected filtrate was frozen and benzene removed by sublimation *in vacuo* to afford **2** as a dark purple powder. (0.4 g, 87%). Crystals suitable for X-ray diffraction were grown from a 2:1 *n*-hexane/benzene mixture at  $-35^\circ\text{C}$ .  $^1\text{H}$  NMR (600 MHz, 295 K,  $\text{C}_6\text{D}_6$ ):  $\delta$ /ppm 45.11, 14.12, 13.68, 12.41, 8.16, 7.58, 5.13, 1.35,  $-1.55$ ,  $-16.71$ . Anal. Calc. for  $\text{C}_{66}\text{H}_{49}\text{CoN}_2$ : C 85.33, H 5.32, N 3.02; Found: C 84.96, H 5.50, N 3.07.

## B. Synthesis of cobalt imido species.

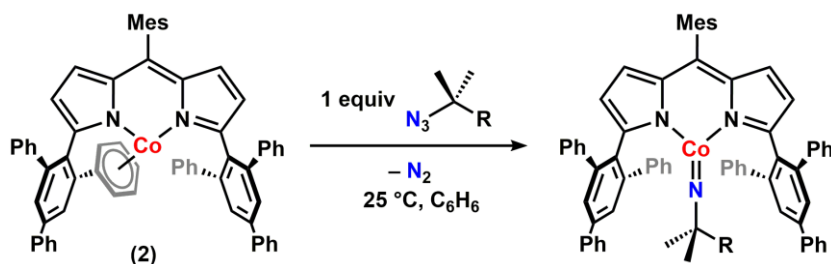

**General procedure:** A solution of azide (1.0 equiv) in benzene was added to a stirring solution of (<sup>Ar</sup>L)Co (**2**) (50 mg, 1.0 equiv) in benzene to observe an immediate color change from dark purple to grayish purple. After stirring for 10 minutes at room temperature, the reaction mixture was concentrated *in vacuo* to afford the corresponding cobalt imido complex.

(<sup>Ar</sup>L)Co(NR'), R' = C(CH<sub>3</sub>)<sub>2</sub>(CH<sub>2</sub>)<sub>3</sub>CH<sub>3</sub> (**3**): 52 mg, 92%. <sup>1</sup>H NMR (600 MHz, C<sub>6</sub>D<sub>6</sub>): δ/ppm 24.82 (s), 20.97 (s), 11.21 (s), 11.14 (s), 11.00 (s), 10.37 (s), 8.01 (s), 7.82 (s), 7.67 (m), 5.20 (s), 4.88 (s), 3.95 (s), 3.37 (s), 0.89 (s), -9.32 (s). Anal. Calc. for C<sub>73</sub>H<sub>64</sub>CoN<sub>3</sub>: C 84.12, H 6.19, N 4.03; Found: C 84.20, H 6.09, N 4.36. Crystals suitable for X-ray diffraction were grown from a *n*-hexane:benzene solution at -35 °C.

(<sup>Ar</sup>L)Co(NR'), R' = C(CH<sub>3</sub>)<sub>2</sub>(CH<sub>2</sub>)<sub>2</sub>CH(CH<sub>3</sub>)<sub>2</sub> (**4**): 51 mg, 90%. <sup>1</sup>H NMR (500 MHz, C<sub>6</sub>D<sub>6</sub>): δ/ppm 25.26 (s), 20.92 (s), 11.34 (s), 11.14 (s), 10.62 (s), 8.02 (s), 8.01 (s), 7.84 (t), 7.68 (m), 5.12 (s), 4.96 (s), 3.87 (s), 3.27 (t), 2.56 (d), 1.02 (s), -9.91 (s). Anal. Calc. for C<sub>74</sub>H<sub>66</sub>CoN<sub>3</sub>: C 84.14, H 6.30, N 3.98; Found: C 84.03, H 6.35, N 4.30. Crystals suitable for X-ray diffraction were grown from a *n*-hexane:benzene solution at -35 °C.

(<sup>Ar</sup>L)Co(NAd) (**10**): 50 mg, 87%. <sup>1</sup>H NMR (600 MHz, C<sub>6</sub>D<sub>6</sub>): δ/ppm 19.88 (s), 15.01 (s), 11.97 (s), 11.84 (s), 11.54 (s), 11.29 (d), 8.75 (d), 8.11 (d), 7.93 (t), 7.78 (t), 5.26 (s), 4.91 (s), 3.71 (s), 2.85 (t), 0.34 (s), -11.64 (s). Anal. Calc. for C<sub>76</sub>H<sub>64</sub>CoN<sub>3</sub>: C 84.65, H 5.98, N 3.90; Found: C 84.95, H 5.99, N 3.76. Crystals suitable for X-ray diffraction were grown from a *n*-hexane:toluene solution at -35 °C.



### C. Synthesis of cobalt tetrazenes species.

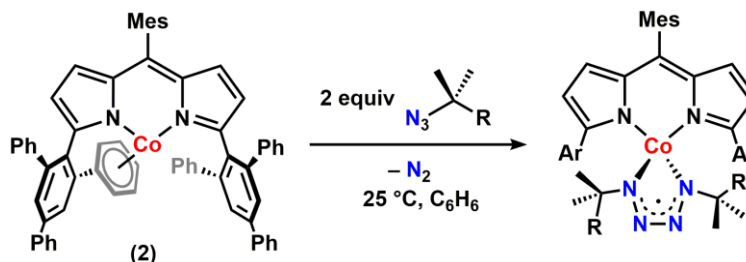

**General procedure:** A solution of azide (2.0 equiv) in benzene was added to a stirring solution of (<sup>Ar</sup>L)Co (**2**) (50 mg, 1.0 equiv) in benzene to observe an immediate color change from dark purple to reddish purple. After stirring for 6 hours at room temperature, the reaction mixture was concentrated *in vacuo* to afford the corresponding cobalt tetrazenes complex.

(<sup>Ar</sup>L)Co( $\kappa^2$ -N<sub>4</sub>R'<sub>2</sub>), R' = C(CH<sub>3</sub>)<sub>2</sub>(CH<sub>2</sub>)<sub>3</sub>CH<sub>3</sub> (**5**): 56 mg, 88%. <sup>1</sup>H NMR (500 MHz, C<sub>6</sub>D<sub>6</sub>):  $\delta$ /ppm 31.13 (br. s), 24.61 (s), 20.78 (s), 16.30 (s), 13.05 (s), 12.02 (s), 10.30 (s), 7.74 (s), 5.37 (s), 2.26 (s), 0.35 (s), 0.33 (s), -3.45 (s), -5.55 (br. s), -6.17 (br. s), -6.89 (br. s), -7.13 (br. s), -9.16 (s), -10.60 (br. s), -34.98 (br. s), -42.87 (br. s). Anal. Calc. for C<sub>80</sub>H<sub>79</sub>CoN<sub>6</sub>: C 81.19, H 6.73, N 7.10; Found: C 80.89, H 6.57, N 6.98. Crystals suitable for X-ray diffraction were grown from a *n*-hexane:benzene solution at room temperature.

(<sup>Ar</sup>L)Co( $\kappa^2$ -N<sub>4</sub>R'<sub>2</sub>), R' = C(CH<sub>3</sub>)<sub>2</sub>(CH<sub>2</sub>)<sub>2</sub>CH(CH<sub>3</sub>)<sub>2</sub> (**6**): 61 mg, 93%. <sup>1</sup>H NMR (500 MHz, C<sub>6</sub>D<sub>6</sub>):  $\delta$ /ppm 30.57 (br. s), 20.98 (br. s), 16.14 (s), 11.94 (s), 9.43 (br. s), 5.71 (s), 5.52 (s), 3.89 (s), 0.09 (s), -3.95 (br. s), -4.45 (br. s), -6.18 (br. s), -7.54 (br. s), -9.83 (br. s), -14.00 (br. s), -65.09 (br. s). Anal. Calc. for C<sub>82</sub>H<sub>83</sub>CoN<sub>6</sub>: C 81.29, H 6.91, N 6.94; Found: C 81.05, H 6.54, N 6.58. Crystals suitable for X-ray diffraction were grown from a *n*-hexane:benzene solution at room temperature.

(<sup>Ar</sup>L)Co( $\kappa^2$ -N<sub>4</sub>Ad<sub>2</sub>) (**11**): 61 mg, 91%. <sup>1</sup>H NMR (500 MHz, C<sub>6</sub>D<sub>6</sub>):  $\delta$ /ppm 30.57 (br. s), 20.98 (br. s), 16.14 (s), 11.94 (s), 9.43 (br. s), 5.71 (s), 5.52 (s), 3.89 (s), 0.09 (s), -3.95 (br. s), -4.45 (br. s), -6.18 (br. s), -7.54 (br. s), -9.83 (br. s), -14.00 (br. s), -65.09 (br. s). Anal. Calc. for C<sub>86</sub>H<sub>79</sub>CoN<sub>6</sub>: C 82.27, H 6.34, N 6.69; Found: C 82.19, H 6.40, N 7.06. Crystals suitable for X-ray diffraction were grown from a *n*-hexane:benzene solution at room temperature.

## Organoazide Syntheses.

### General procedures for preparation of organoazides.

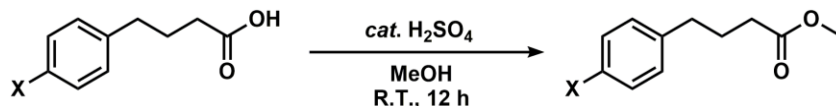

**Procedure A:** Catalytic amount of concentrated  $\text{H}_2\text{SO}_4$  was added to a solution of the corresponding 4-phenylbutanoic acid (1 equiv) in 50 mL methanol. The reaction mixture was stirred at 25 °C for 12 hours. Upon completion, the reaction mixture was concentrated and diluted in  $\text{Et}_2\text{O}$ . The aqueous phase was extracted three times with  $\text{Et}_2\text{O}$  and the combined organic phases were washed with brine, dried over  $\text{MgSO}_4$ , filtered and concentrated. The product was used without further purification.

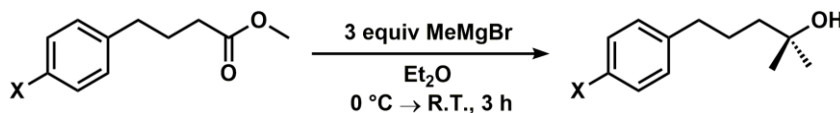

**Procedure B:** An oven-dried Schlenk flask was charged with 3 g of the corresponding methyl 4-phenylbutanoate in dry  $\text{Et}_2\text{O}$  and placed under  $\text{N}_2$ . The solution was cooled in an ice-bath and a diethyl ether solution of methylmagnesium bromide (3.0 M in diethyl ether) was added slowly at 0 °C. The reaction mixture was stirred at room temperature for 3 hours before it was quenched with a saturated aqueous solution of  $\text{NH}_4\text{Cl}$  and diluted with water. The aqueous phase was extracted three times with diethyl ether. The combined organic phases were washed with brine, dried over  $\text{MgSO}_4$ , filtered and concentrated. The product was used without further purification.

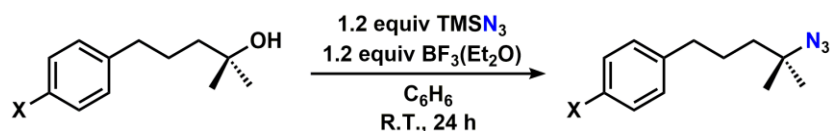

**Procedure C:** (adapted from literature procedure)<sup>2</sup>: An oven-dried Schlenk flask was charged with a tertiary alcohol (15 mmol, 1 equiv) and azidotrimethylsilane (1.2 equiv) in benzene (0.5 M) under N<sub>2</sub>. Boron trifluoride diethyl etherate (1.2 equiv) was added dropwise at 25 °C to the stirring solution. After 24 hours, the mixture was poured into water and extracted three times with Et<sub>2</sub>O. The combined organic phases were washed with brine and dried over MgSO<sub>4</sub>, filtered, and concentrated. The crude products were purified via silica gel chromatography (100% hexanes as an eluent) and stored over molecular sieves for further use.

**A. 2-Methyl-2-azidohexane:** Synthesized following Procedure C. 67%

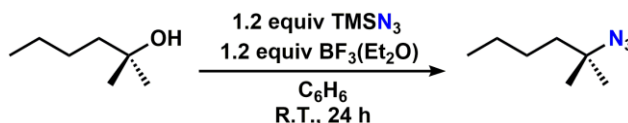

**<sup>1</sup>H NMR** (600 MHz, CDCl<sub>3</sub>): δ/ppm 1.47–1.50 (m, 2 H), 1.31–1.34 (m, 4 H), 1.25 (s, 6 H), 0.90 (d, 6 H). **<sup>13</sup>C{<sup>1</sup>H} NMR** (125 MHz, CDCl<sub>3</sub>): δ/ppm 61.9, 41.3, 26.6, 26.1, 23.2, 14.2. **HRMS** (ESI<sup>+</sup>) *m/z* Calc. 159.1604 [C<sub>7</sub>H<sub>15</sub>N<sub>3</sub>+NH<sub>4</sub>]<sup>+</sup>, Found 159.1604 [M+NH<sub>4</sub>]<sup>+</sup>.

**B. 2,4-Dimethyl-2-azidohexane:** Synthesized following Procedure C. 73%

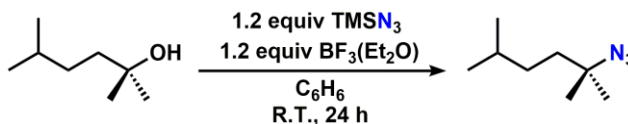

**<sup>1</sup>H NMR** (600 MHz, CDCl<sub>3</sub>): δ/ppm 1.46–1.50 (m, 4 H), 1.25 (s, 6 H), 1.20–1.23 (m, 1 H), 0.81 (d, *J* = 6.6 Hz, 6 H). **<sup>13</sup>C{<sup>1</sup>H} NMR** (125 MHz, CDCl<sub>3</sub>): δ/ppm 61.9, 39.3, 33.3, 28.5, 26.2, 22.7. **HRMS** (ESI<sup>+</sup>) *m/z* Calc. 173.1761 [C<sub>8</sub>H<sub>17</sub>N<sub>3</sub>+ NH<sub>4</sub>]<sup>+</sup>, Found 173.1760 [M+NH<sub>4</sub>]<sup>+</sup>.

<sup>2</sup> Hennessy, E.T.; Betley, T.A. *Science*. **2013**, 340, 591

### C. Synthesis of (4-azido-4-methylpentyl)benzene.

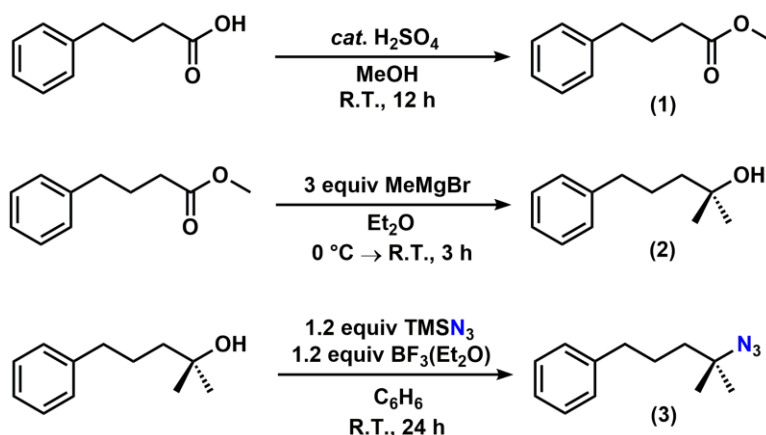

(1) **Methyl 4-phenylbutanoate:** Synthesized following Procedure A. Spectral data were consistent with previously reported characterization of the product.<sup>3</sup>

(2) **2-Methyl-5-phenylpentan-2-ol:** Synthesized following Procedure B. Spectral data were consistent with previously reported characterization of the product.<sup>4</sup>

(3) **(4-azido-4-methylpentyl)benzene:** Synthesized following Procedure C. 76% <sup>1</sup>H NMR (600 MHz, CDCl<sub>3</sub>): δ/ppm 7.28–7.31 (m, 2 H), 7.18–7.21 (m, 3 H), 2.63 (t, 2 H), 1.67–1.73 (m, 2 H), 1.51–1.55 (m, 2 H), 1.25 (s, 6 H). <sup>13</sup>C{<sup>1</sup>H} NMR (125 MHz, CDCl<sub>3</sub>): δ/ppm 142.2, 128.5, 126.0, 61.7, 41.2, 36.2, 26.3, 26.1. HRMS (ESI<sup>+</sup>) *m/z* Calc. 221.1761 [C<sub>12</sub>H<sub>17</sub>N<sub>3</sub>+NH<sub>4</sub>]<sup>+</sup>, Found. 221.1763 [M+NH<sub>4</sub>]<sup>+</sup>.

<sup>3</sup> Faisal, S.; Zang, Q.; Maity, P. K.; Brandhofer, A.; Kearney, P. C.; Reiser, O.; Grass, R. N.; Stoianova, D.; Hanson, P. R. *Org. Lett.* **2017**, *19*, 2274

<sup>4</sup> Cui, L.-Q.; Liu, K.; Zhang, C. *Org. Biomol. Chem.* **2011**, *9*, 2258

#### D. Synthesis of (4-azido-4-methylpentyl-1,1-*d*<sub>2</sub>)benzene.

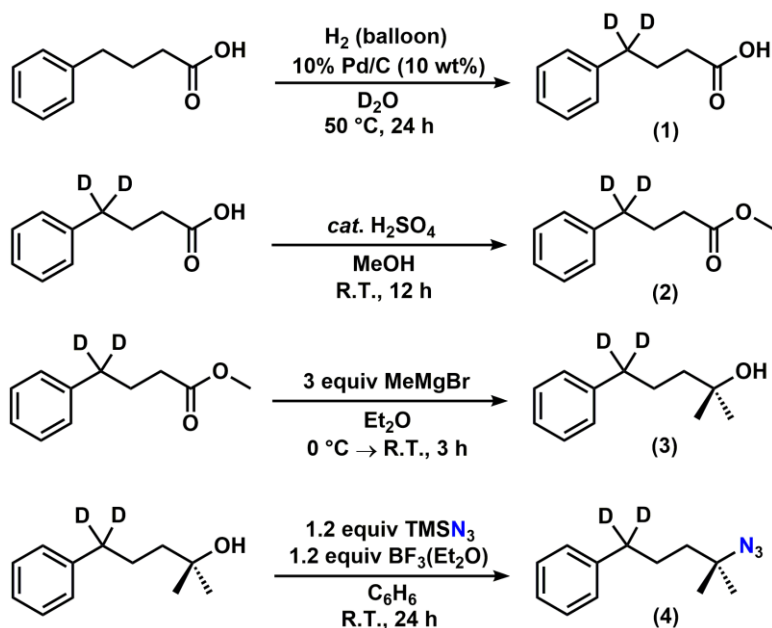

**(1) 4-phenylbutanoic-4,4-*d*<sub>2</sub> acid:** The procedure was modified from a previously reported preparation.<sup>5</sup> A 50 mL Schlenk flask was charged with 4-phenylbutanoic acid (3 g, 1.0 equiv) and 10 % Pd/C (0.3 g, 10 wt%) with 12 mL D<sub>2</sub>O. The reaction flask was fitted with a balloon full of H<sub>2</sub> and purged with H<sub>2</sub> three times. The resulted black suspension was heated at 50 °C for 24 hours. After 24 hours, the reaction mixture was filtered through Celite to remove Pd/C and washed with diethyl ether. The aqueous phase was extracted three times with diethyl ether. The combined organic phases were washed with brine, dried over MgSO<sub>4</sub>, filtered, and concentrated. The product was used without further purification. The deuterium content (93%) was determined by <sup>1</sup>H NMR integration of methyl groups to the benzylic hydrogens. <sup>1</sup>H NMR (600 MHz, C<sub>6</sub>D<sub>6</sub>) δ/ppm: 12.1 (br, s, 1 H), 7.13 (t, 2 H), 7.06 (t, 1 H), 6.97 (d, 2 H), 2.01 (t, 2 H), 1.70 (t, 2 H). <sup>13</sup>C{<sup>1</sup>H} NMR (125 MHz, CDCl<sub>3</sub>) δ/ppm: 179.9, 141.2, 128.6, 128.5, 126.2, 34.4 (quint, *J*<sub>C-D</sub> = 18.1 Hz), 33.3, 26.2. HRMS (ESI<sup>+</sup>) *m/z* Calc. 167.1036 [C<sub>10</sub>H<sub>10</sub>D<sub>2</sub>O<sub>2</sub>+H]<sup>+</sup>, Found. 167.1011 [M+H]<sup>+</sup>.

**(2) methyl-4-phenylbutanoate-4,4-*d*<sub>2</sub>:** Synthesized following Procedure A. <sup>1</sup>H NMR (600 MHz, CDCl<sub>3</sub>) δ/ppm: 7.27–7.30 (m, 2 H), 7.17–7.21 (m, 3 H), 3.67 (s, 3 H), 2.33 (m, 2 H), 1.95 (m, 2 H). <sup>13</sup>C{<sup>1</sup>H} NMR (125 MHz, CDCl<sub>3</sub>) δ/ppm: 174.0, 141.4, 128.6, 128.5, 126.1, 51.6, 34.5 (quint,

<sup>5</sup> Kurita, T.; Hattori, K.; Seki, S.; Mizumoto, T.; Aoki, F.; Yamada, Y.; Ikawa, K.; Maegawa, T.; Monguchi, Y.; Sajiki, H. *Chem. Eur. J.* **2008**, *14*, 664

$J_{C-D} = 19.3$  Hz), 33.4, 26.4. **HRMS** (ESI<sup>+</sup>)  $m/z$  Calc. 181.1192 [C<sub>11</sub>H<sub>12</sub>D<sub>2</sub>O<sub>2</sub>+H]<sup>+</sup>, Found. 182.1190 [M+H]<sup>+</sup>.

**(3) 2-methyl-5-phenylpentan-5,5-*d*<sub>2</sub>-2-ol**: Synthesized following Procedure B. **<sup>1</sup>H NMR** (600 MHz, C<sub>6</sub>D<sub>6</sub>)  $\delta$ /ppm: 7.18–7.20 (m, 2 H), 7.08–7.10 (m, 3 H), 1.55–1.58 (m, 2 H), 1.26–1.29 (m, 2 H), 0.98 (s, 6 H). **<sup>13</sup>C{<sup>1</sup>H} NMR** (125 MHz, CDCl<sub>3</sub>)  $\delta$ /ppm: 142.2, 128.2, 128.1, 125.5, 70.5, 43.2, 35.7 (quintet,  $J_{C-D} = 19.2$  Hz), 28.9, 26.0. **HRMS** (ESI<sup>+</sup>)  $m/z$  Calc. 181.1556 [C<sub>12</sub>H<sub>16</sub>D<sub>2</sub>O+H]<sup>+</sup>, Found. 181.1517 [M+H]<sup>+</sup>.

**(4) (4-azido-4-methylpentyl-1,1-*d*<sub>2</sub>)benzene**: Synthesized following Procedure C. 70% **<sup>1</sup>H NMR** (600 MHz, CDCl<sub>3</sub>)  $\delta$ /ppm: 7.29–7.31 (m, 2 H), 7.19–7.22 (m, 3 H), 1.68–1.71 (m, 2 H), 1.52–1.55 (m, 2 H), 1.26 (s, 6 H). **<sup>13</sup>C{<sup>1</sup>H} NMR** (125 MHz, CDCl<sub>3</sub>)  $\delta$ /ppm: 142.1, 128.5, 126.0, 61.7, 41.1, 35.4 (quintet,  $J_{C-D} = 19.4$  Hz), 26.1. **HRMS** (ESI<sup>+</sup>)  $m/z$  Calc. 223.1886 [C<sub>12</sub>H<sub>15</sub>D<sub>2</sub>N<sub>3</sub>+NH<sub>4</sub>]<sup>+</sup>, Found. 223.1883 [M+NH<sub>4</sub>]<sup>+</sup>.

#### E. Synthesis of (4-azido-4-methylpentyl-1-*d*)benzene.

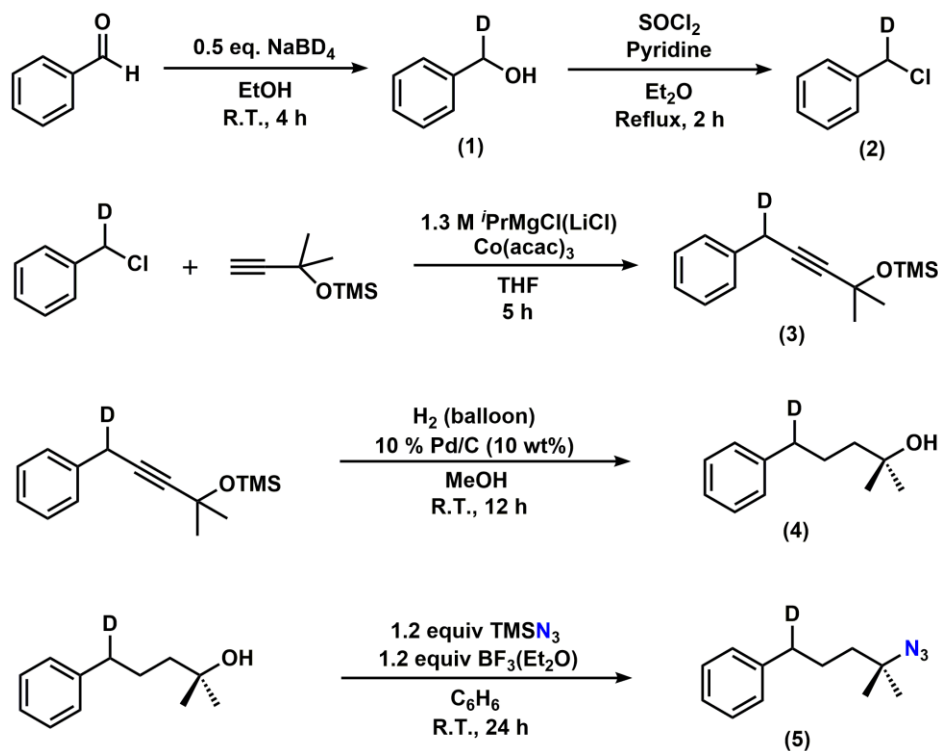

**(1) phenylmethan-*d*-ol:** Synthesized following previously reported procedure.<sup>6</sup> Spectral data were consistent with previously reported characterization of the product.<sup>6</sup>

**(2) (chloromethyl-*d*)benzene:** Synthesized following previously reported procedure.<sup>7</sup> <sup>1</sup>H NMR (600 MHz, CDCl<sub>3</sub>) δ/ppm: 7.32–7.41 (m, 5 H), 4.59 (d, 1 H). <sup>13</sup>C{<sup>1</sup>H} NMR (125 MHz, CDCl<sub>3</sub>) δ/ppm: 137.6, 128.9, 128.7, 128.5, 46.1 (t, *J*<sub>C-D</sub> = 23.1 Hz). GCMS (EI) *t*<sub>R</sub> = 4.95 min *m/z*: 130.03, 129.03, 128.03, 127.03, 126.02, 125.02.

**(3) trimethyl((2-methyl-5-phenylpent-3-yn-2-yl-5-*d*)oxy)silane:** Synthesized following previously reported procedure.<sup>8</sup> An oven-dried Schlenk flask was charged with 3-methyl-3-trimethylsiloxy-1-butyne (1.5 equiv) in dry THF. The solution was cooled to 0 °C and <sup>i</sup>PrMgCl(LiCl) (1.6 equiv) was added. The reaction mixture was stirred for 2 hours at room temperature. Then the reaction mixture was Cannula-transferred to a solution of (chloromethyl-*d*)benzene (1.0 equiv) and Co(acac)<sub>3</sub> (0.03 equiv) in THF at 0 °C. The reaction mixture was stirred for another 5 hours and quenched with a saturated aqueous solution of NH<sub>4</sub>Cl and diluted with water. The aqueous phase was extracted three times with diethyl ether. The combined organic phases were washed with brine, dried over MgSO<sub>4</sub>, filtered and concentrated. The product was purified by flash column chromatography on silica gel with hexanes as an eluent. <sup>1</sup>H NMR (600 MHz, CDCl<sub>3</sub>) δ/ppm: 7.32–7.41 (m, 5 H), 4.59 (d, 1 H). <sup>13</sup>C{<sup>1</sup>H} NMR (125 MHz, CDCl<sub>3</sub>) δ/ppm: 136.7, 128.6, 128.0, 126.7, 87.8, 80.7, 66.8, 33.4 24.9 (t, *J*<sub>C-D</sub> = 19.9 Hz ), 2.03. HRMS (ESI<sup>+</sup>) *m/z*: Calc. 248.1575 [C<sub>15</sub>H<sub>21</sub>DOSi+H]<sup>+</sup>, Found. 248.1572 [M+H]<sup>+</sup>.

**(4) 2-methyl-5-phenylpentan-5-*d*-2-ol:** Synthesized following previously reported procedure.<sup>9</sup> An oven-dried Schlenk flask was charged with trimethyl((2-methyl-5-phenylpent-3-yn-2-yl-5-*d*)oxy)silane in MeOH and the solution was purged with N<sub>2</sub> three times. 10% of Pd/C (10 wt%) was added and a balloon of H<sub>2</sub> was attached to the flask. The reaction mixture was stirred for 12 hours at room temperature, filtered through Celite, and washed with Et<sub>2</sub>O. The product was purified by flash column chromatography on silica gel with 10:1 (hexanes:ethyl acetate) as an

<sup>6</sup> Wang, L.; Shang, S.; Li, G.; Ren, L.; Lv, Y.; Gao, S. *J. Org. Chem.* **2016**, *81*, 2189

<sup>7</sup> Popoff, N.; Macqueron, B.; Sayhoun, W.; Espinas, J.; Pelletier, J.; Boyron, O.; Boisson, C.; Merle, N.; Szeto, K. C.; Gauvin, R. M.; De Mallmann, A.; Taoufik, M. *Eur. J. Inorg. Chem.* **2014**, *5*, 888

<sup>8</sup> Quinio, P.; François, C.; Escribano Cuesta, A.; Steib, A. K.; Achraier, F.; Zipse, H.; Karaghiosoff, K.; Knochel, P. *Org. Lett.* **2015**, *17*, 1010

<sup>9</sup> Nicolaou, K. C.; Reingruber, R.; Sarlah, D.; Bräse, S. *J. Am. Chem. Soc.* **2009**, *131*, 2086

eluent.  $^1\text{H}$  NMR (600 MHz,  $\text{CDCl}_3$ )  $\delta$ /ppm: 7.32–7.41 (m, 5 H), 4.59 (d, 1 H).  $^{13}\text{C}\{^1\text{H}\}$  NMR (125 MHz,  $\text{CDCl}_3$ )  $\delta$ /ppm: 142.4, 128.3, 128.2, 125.6, 70.6, 43.4, 35.9 (t,  $J_{\text{C-D}} = 19.4$  Hz), 26.2. HRMS (ESI $^+$ )  $m/z$  Calc. 180.1493 [ $\text{C}_{12}\text{H}_{17}\text{DO}+\text{H}$ ] $^+$ , Found. 180.1478 [ $\text{M}+\text{H}$ ] $^+$ .

**(5) (4-azido-4-methylpentyl-1-*d*)benzene:** Synthesized following Procedure C. 53%  $^1\text{H}$  NMR (600 MHz,  $\text{CDCl}_3$ )  $\delta$ /ppm: 7.29–7.31 (m, 2 H), 7.19–7.22 (m, 3 H), 1.68–1.71 (m, 2 H), 1.52–1.55 (m, 2 H), 1.26 (s, 6 H).  $^{13}\text{C}\{^1\text{H}\}$  NMR (125 MHz,  $\text{CDCl}_3$ )  $\delta$ /ppm: 142.1, 128.5, 126.0, 61.7, 41.1, 35.8 (t,  $J_{\text{C-D}} = 19.5$  Hz), 26.1. HRMS (ESI $^+$ )  $m/z$  Calc. 222.1823 [ $\text{C}_{12}\text{H}_{16}\text{DN}_3+\text{NH}_4$ ] $^+$ , Found. 222.1823 [ $\text{M}+\text{NH}_4$ ] $^+$ .

#### F. Synthesis of 1-(4-azido-4-methylpentyl)-4-methylbenzene.

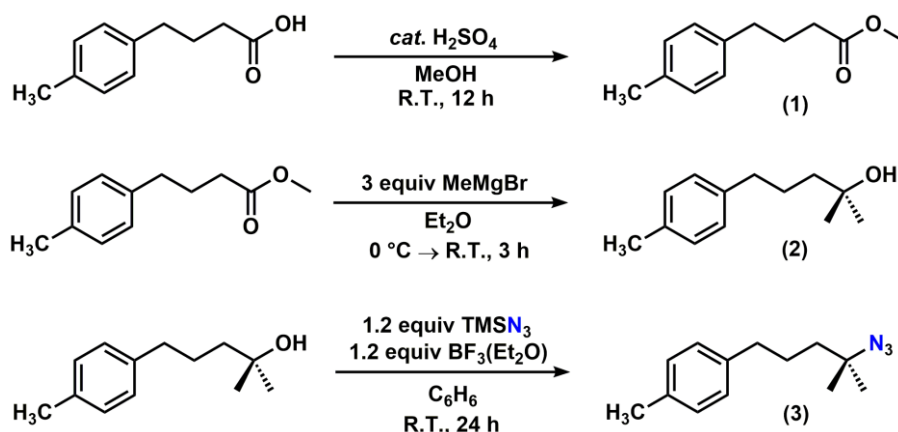

**(1) methyl 4-(*p*-tolyl)butanoate:** Synthesized following Procedure A. Spectral data were consistent with previously reported characterization of the product.<sup>10</sup>

**(2) 2-methyl-5-(*p*-tolyl)pentan-2-ol:** Synthesized following Procedure B. Spectral data were consistent with previously reported characterization of the product.<sup>11</sup>

**(3) 1-(4-azido-4-methylpentyl)-4-methylbenzene:** Synthesized following Procedure C. 56%  $^1\text{H}$  NMR (600 MHz,  $\text{C}_6\text{D}_6$ )  $\delta$ /ppm: 6.98–7.03 (m, 4 H), 2.39 (t, 2 H), 1.50–1.54 (m, 2 H), 1.23–1.26 (m, 2 H), 0.90 (s, 6 H).  $^{13}\text{C}\{^1\text{H}\}$  NMR (125 MHz,  $\text{CDCl}_3$ )  $\delta$ /ppm: 139.1, 135.4, 129.2, 128.4,

<sup>10</sup> Shimogaki, M.; Fujita, M.; Sugimura, T. *Angew. Chem. Int. Ed.* **2016**, *55*, 15797

<sup>11</sup> Benoit, Gerard; Gronemeyer, Hinrich; Lanotte, Michel; Gottardis, Marco. U.S. 6624154, **2003**



61.73, 41.21, 35.74, 26.37, 26.13, 21.15. **HRMS** (ESI<sup>+</sup>) *m/z* Calc. 235.1917 [C<sub>13</sub>H<sub>19</sub>N<sub>3</sub>+NH<sub>4</sub>]<sup>+</sup>, Found. 235.1914 [M+NH<sub>4</sub>]<sup>+</sup>.

### G. Synthesis of 1-(4-azido-4-methylpentyl)-4-methoxybenzene.

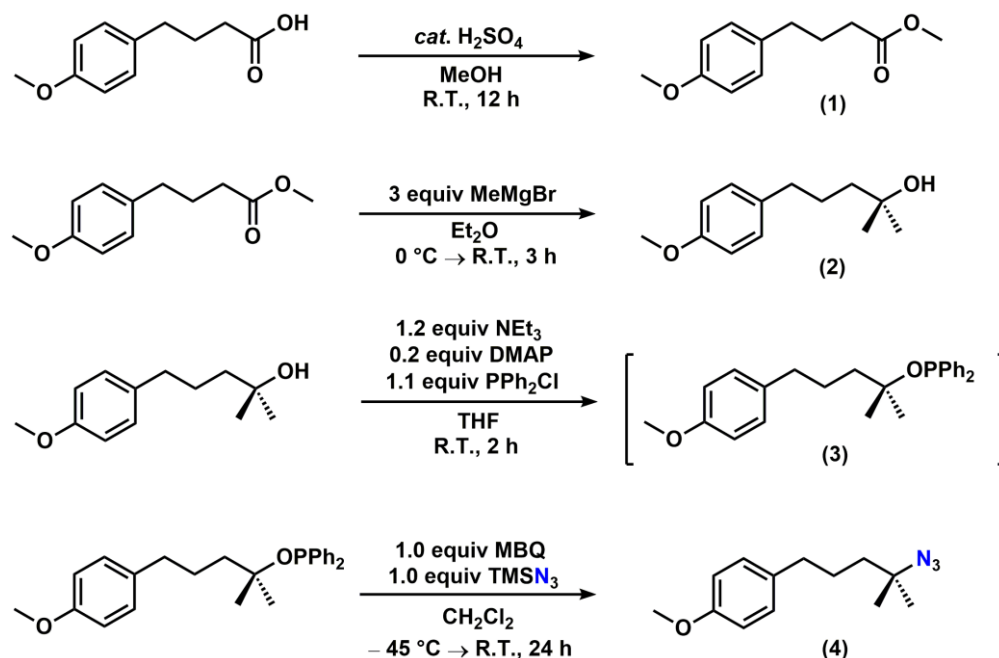

**(1) methyl 4-(4-methoxyphenyl)butanoate:** Synthesized following Procedure A. Spectral data were consistent with previously reported characterization of the product.<sup>12</sup>

**(2) 5-(4-methoxyphenyl)-2-methylpentan-2-ol:** Synthesized following Procedure B. Spectral data were consistent with previously reported characterization of the product.<sup>11</sup>

**(3) ((5-(4-methoxyphenyl)-2-methylpentan-2-yl)oxy)diphenylphosphane:** Adapted from previously reported procedure.<sup>13</sup> An oven-dried Schlenk flask was charged with 5-(4-methoxyphenyl)-2-methylpentan-2-ol (1.0 equiv) and DMAP (0.2 equiv) in THF. To the stirring solution were added NEt<sub>3</sub> (1.2 equiv) and PPh<sub>2</sub>Cl (1.1 equiv). The reaction mixture was stirred for 2 hours at room temperature, filtered through a pad of alumina, and concentrated. The isolated material was used for azidation without further purification.

<sup>12</sup> Bunce, R. A.; Cox, A. N. *Org. Prep. Proced. Intl.* **2010**, 42, 2010

<sup>13</sup> Kuroda, K.; Hayashi, Y.; Mukaiyama, T. *Tetrahedron.* **2007**, 63, 6358

**(4) 1-(4-azido-4-methylpentyl)-4-methoxybenzene:** Adapted from previously reported procedure.<sup>13</sup> An oven-dried Schlenk flask was charged with ((5-(4-methoxyphenyl)-2-methylpentan-2-yl)oxy)diphenylphosphane (1.0 equiv) in dry dichloromethane and the solution was cooled to  $-45\text{ }^{\circ}\text{C}$ . MBQ (1.0 equiv) and  $\text{TMSN}_3$  (1.0 equiv) were added to the stirring solution. The reaction mixture was slowly warmed up to room temperature and stirred for 24 hours. The product was purified by preparative TLC to afford the product.  $^1\text{H}$  NMR (600 MHz,  $\text{CDCl}_3$ )  $\delta/\text{ppm}$ : 7.10–7.09 (d, 2 H), 6.84–6.83 (d, 2 H), 3.79 (s, 3 H), 2.56 (t, 2 H), 1.66 (m, 2 H), 1.52 (m, 2 H), 1.24 (s, 6 H).  $^{13}\text{C}\{^1\text{H}\}$  NMR (125 MHz,  $\text{CDCl}_3$ )  $\delta/\text{ppm}$ : 157.9, 134.3, 129.4, 113.9, 61.73, 55.40, 41.14, 35.26, 26.47, 26.14. HRMS (ESI<sup>+</sup>)  $m/z$  Calc. 251.1886 [ $\text{C}_{13}\text{H}_{19}\text{N}_3\text{O}+\text{NH}_4$ ]<sup>+</sup>, Found. 251.1883 [ $\text{M}+\text{NH}_4$ ]<sup>+</sup>.

#### H. Synthesis of 1-(4-azido-4-methylpentyl)-4-(trifluoromethyl)benzene.

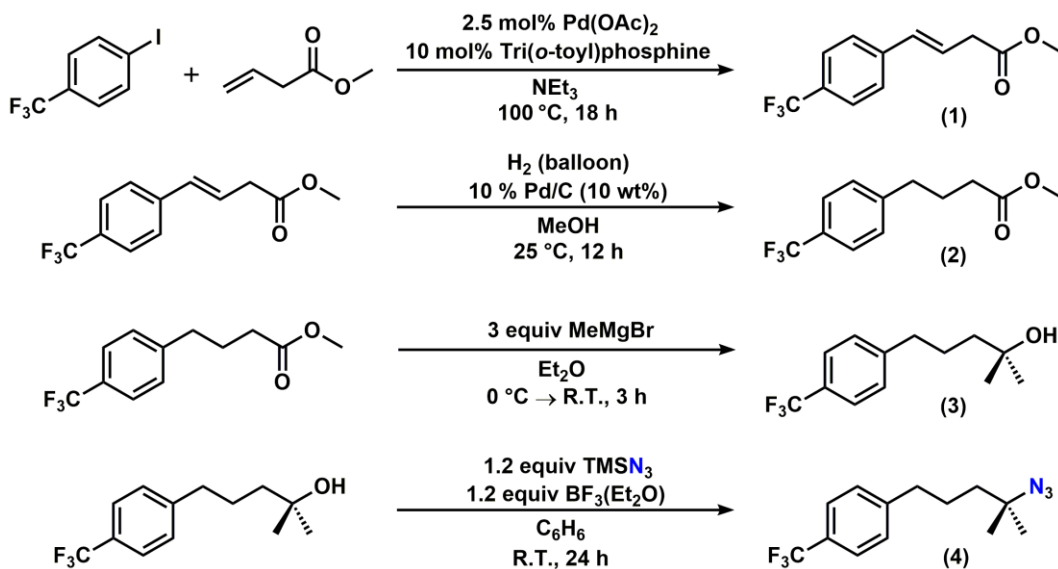

**(1) methyl (E)-4-(4-(trifluoromethyl)phenyl)but-3-enoate:** Synthesized following previously reported procedure.<sup>14</sup> Spectral data were consistent with previously reported characterization of the product.<sup>14</sup>

**(2) methyl 4-(4-(trifluoromethyl)phenyl)butanoate:** An oven-dried Schlenk flask was charged with methyl (E)-4-(4-(trifluoromethyl)phenyl)but-3-enoate in MeOH and the solution was purged

<sup>14</sup> Leach, Colin Andrew and Smith, Stephen Allan, WO 2003042206, 2003

with N<sub>2</sub> three times. 10% of Pd/C (10 wt%) was added and a balloon of H<sub>2</sub> was attached to the flask. The reaction mixture was stirred for 12 hours at room temperature after which it was filtered through Celite. The Celite was washed with Et<sub>2</sub>O and the combined filtrate was concentrated *in vacuo*. The concentrated material was used for the next step without further purification. Spectral data were consistent with previously reported characterization of the product.<sup>11</sup>

**(3) 2-methyl-5-(4-(trifluoromethyl)phenyl)pentan-2-ol:** Synthesized following Procedure B. Spectral data were consistent with previously reported characterization of the product.<sup>11</sup>

**(4) 1-(4-azido-4-methylpentyl)-4-(trifluoromethyl)benzene:** Synthesized following Procedure C. 62% <sup>1</sup>H NMR (600 MHz, CDCl<sub>3</sub>) δ/ppm: 7.54–7.55 (d, 2 H), 7.29–7.30 (d, 2 H), 2.68 (t, 2 H), 1.68–1.74 (m, 2 H), 1.50–1.52 (m, 2 H), 1.25 (s, 6 H). <sup>13</sup>C{<sup>1</sup>H} NMR (125 MHz, CDCl<sub>3</sub>) δ/ppm: 146.23, 128.79, 128.56 (q, *J*<sub>C-F</sub> = 32.4 Hz), 128.05 (q, *J*<sub>C-F</sub> = 3.78 Hz), 121.25 (q, *J*<sub>C-F</sub> = 271.7 Hz), 61.55, 41.09, 35.95, 26.12, 25.91. HRMS (ESI<sup>+</sup>) *m/z* Calc. 289.1635 [C<sub>13</sub>H<sub>16</sub>F<sub>3</sub>N<sub>3</sub>+NH<sub>4</sub>]<sup>+</sup>, Found. 290.1568 [M+NH<sub>4</sub>]<sup>+</sup>.

## Mechanistic Studies.

**General considerations for kinetic experiments.** All kinetic experiments were run in J Young nmr tubes at the noted temperature. Stock solutions of (<sup>Ar</sup>L)Co **2**, azide substrate **7**, and pyridine-*d*<sub>5</sub> were prepared in benzene-*d*<sub>6</sub> and were added separately with a micro-syringe to the J Young tube. The reaction mixture was frozen prior to NMR analysis. The frozen reaction mixture was thawed and placed into a thermally stabilized NMR instrument. Reactions were monitored to less than 10% of product (2,2-dimethyl-5-phenylpyrrolidine) **9** formation. <sup>1</sup>H NMR data collection was done by using the array command, collecting spectra every 15 or 30 seconds. The resulting data points were analyzed using the initial rate method assuming the concentration of the cobalt imido **8** is constant during early stages of catalytic reactions. Each experiment was conducted in triplicate and average rates are reported with error bars corresponding to standard errors of those three experiments. 1,3,5-trimethoxybenzene was used as internal standard for <sup>1</sup>H NMR integration.

**A. Order in imido.** The reaction order in imido **8** was determined using the initial rate method with four different **[2]** and constant **[7]** at 50 °C in benzene-*d*<sub>6</sub>. A plot of rate versus **[8]** gave a straight line ( $R^2 = 0.9988$ ), indicating first order dependence on **[8]**.

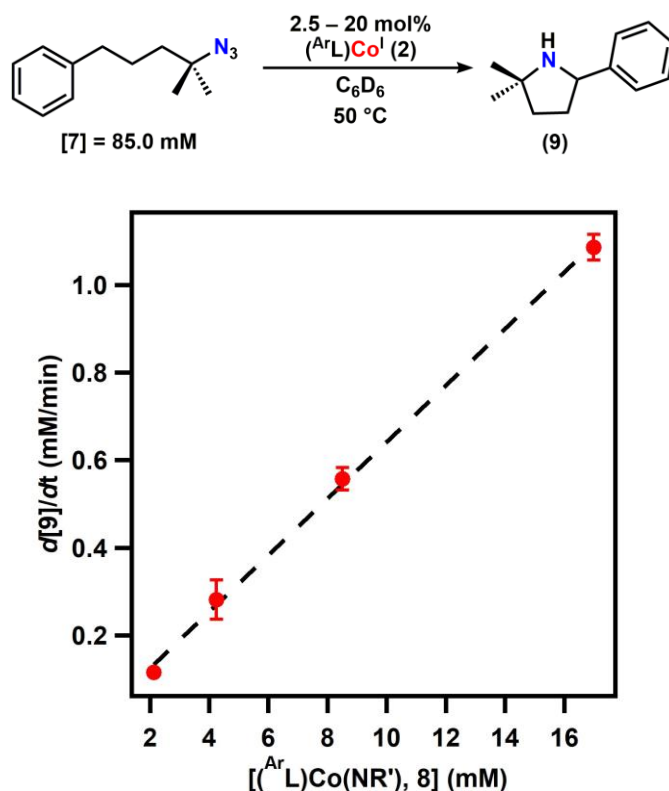

**Figure S-1.** Rate of formation of **9** (mM/min) versus concentrations of imido **8** (mM).

**Table S-1.** Averages and standard errors for the observed initial rates with varying concentrations of imido. The concentrations of imido **8** were calculated based on the initial amount of **2** assuming a quantitative conversion of **2** to **8**.

| Entry | $(^{Ar}L)Co^I$ (mol%) | <b>[8]</b> (mM) | Rate (mM/min)             |
|-------|-----------------------|-----------------|---------------------------|
| 1     | 2.5                   | 2.13            | $1.15(4) \times 10^{-1}$  |
| 2     | 5.0                   | 4.25            | $2.81(45) \times 10^{-1}$ |
| 3     | 10                    | 8.50            | $5.57(25) \times 10^{-1}$ |
| 4     | 20                    | 17.0            | 1.09(3)                   |

**B. Order in azide substrate.** The order in the azide substrate, (4-azido-4-methylpentyl)benzene **7** was determined using the initial rate methods with four different [7] and constant [2] at 50 °C in benzene-*d*<sub>6</sub>.

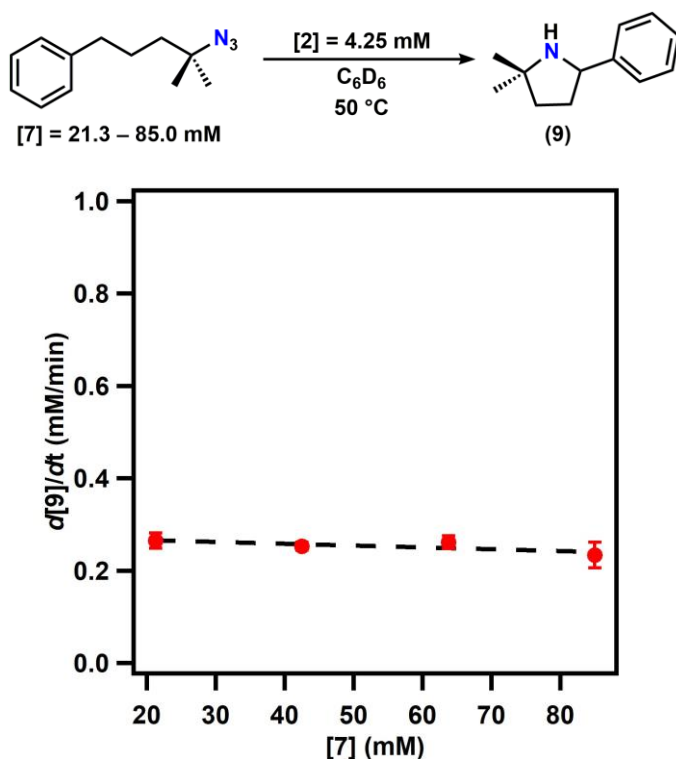

**Figure S-2.** Rate of formation of **9** (mM/min) versus concentrations of azide **7** (mM).

**Table S-2.** Averages and standard errors of the observed initial rates with varying concentrations of azide. [2] and [7] are the initial concentrations of the catalyst and the azide, respectively.

| Entry | [2] (mM) | [7] (mM) | Rate (mM/min)               |
|-------|----------|----------|-----------------------------|
| 1     | 4.25     | 21.3     | 2.65(17) × 10 <sup>-1</sup> |
| 2     | 4.25     | 42.5     | 2.52(9) × 10 <sup>-1</sup>  |
| 3     | 4.25     | 63.8     | 2.61(14) × 10 <sup>-1</sup> |
| 4     | 4.25     | 85.0     | 2.33(28) × 10 <sup>-1</sup> |

C. Proposed catalytic cycle for intramolecular C–H amination in the absence of pyridine.

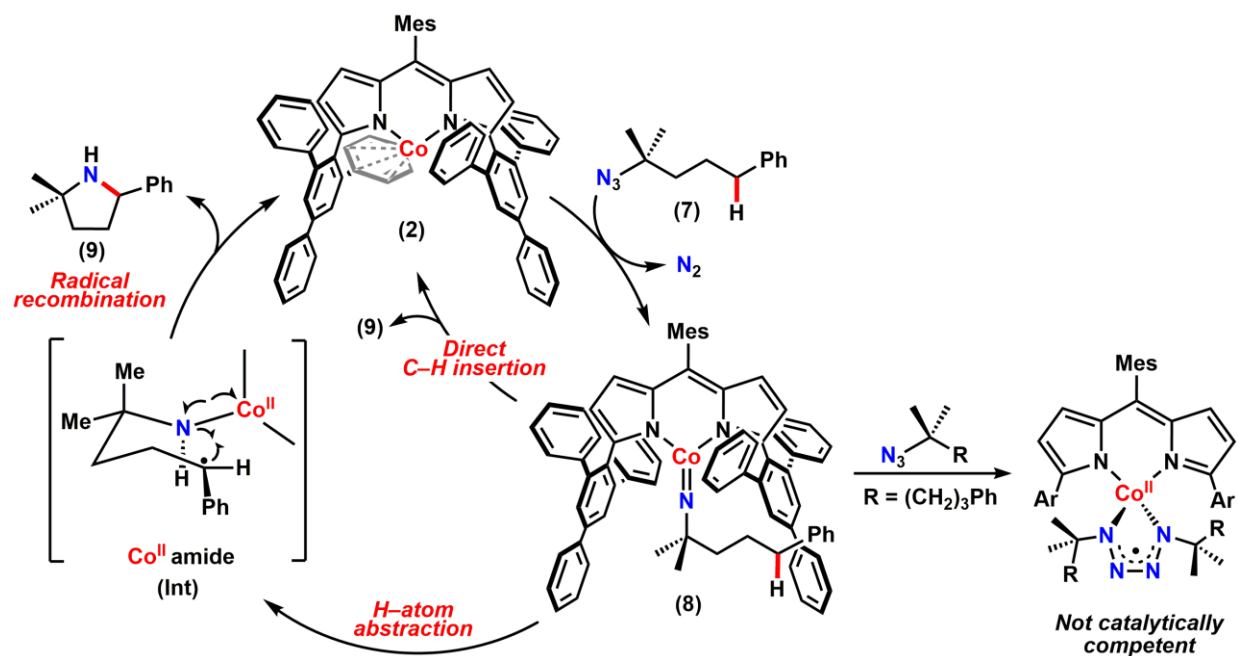

Figure S-3. Proposed catalytic cycle in the absence of pyridine.

**D. Formation of cobalt tetrazido complex as a function of [pyridine-*d*<sub>5</sub>].** The rate of formation of **11** as a function of [pyridine-*d*<sub>5</sub>] was measured at 25 °C in benzene-*d*<sub>6</sub> with [**10**] = 8.50 mM, [**N**<sub>3</sub>Ad] = 85.0 mM, and varying concentrations of pyridine-*d*<sub>5</sub>.

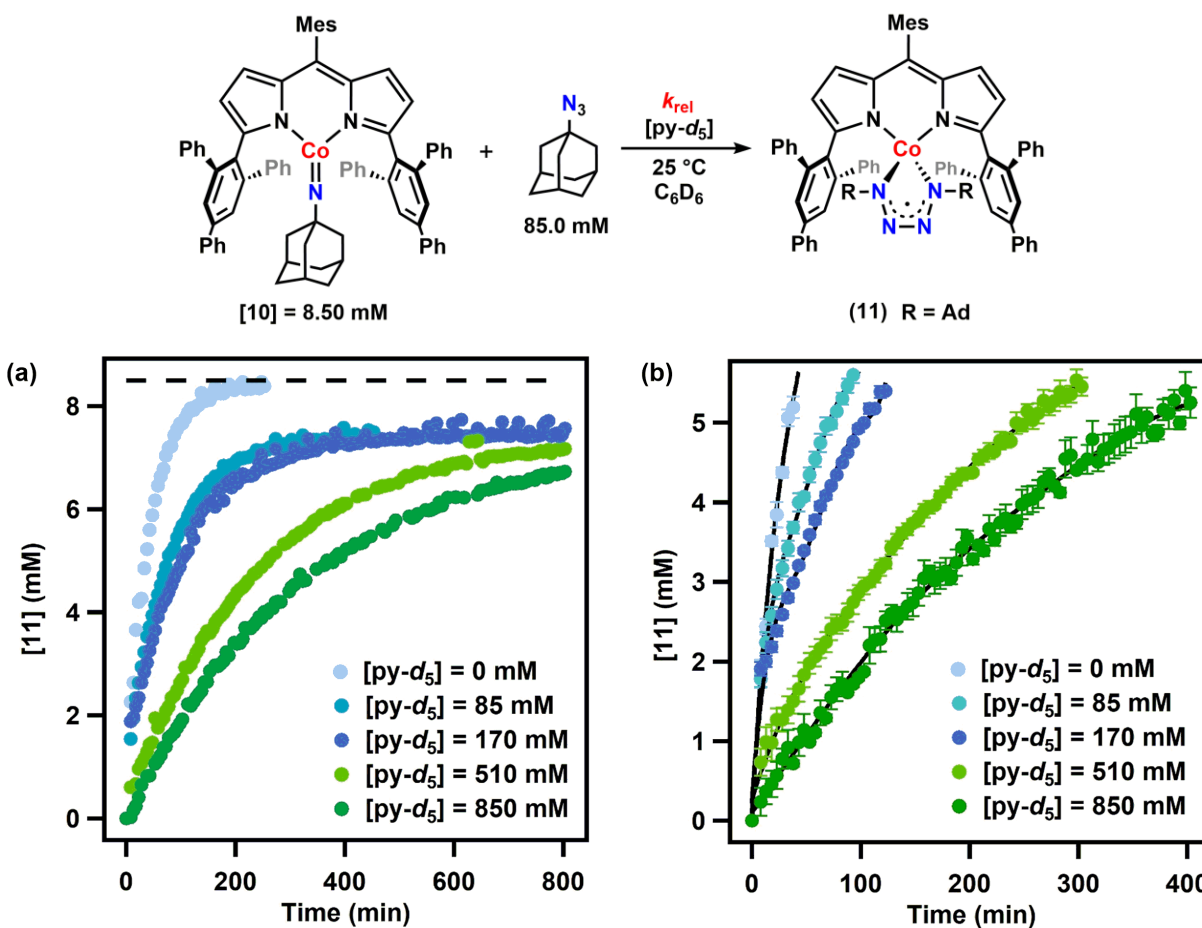

**Figure S-4.** Formation of cobalt tetrazido complex as a function of [pyridine-*d*<sub>5</sub>] (a) Each reaction was monitored up to >75% formation of **11**. Black dashed line represents the [11] at full conversion indicating an empirically determined constant infinity point. (b) Averages of triplicate results measured up to 60% formation of **11**. Error bars depict standard errors. Black lines represent fittings to a 6<sup>th</sup> polynomial, where  $c_0, c_1, c_2 \dots c_6$  are constants, to obtain the overall rates at 50% formation of **11**.<sup>15</sup>

$$[11] = f(t) = c_0 + c_1t + c_2t^2 + c_3t^3 + c_4t^4 + c_5t^5 + c_6t^6$$

<sup>15</sup> Kennedy, C. R.; Lehnher, D.; Rajapaksa, N. S.; Ford, D. D.; Park, Y.; Jacobsen, E. N. *J. Am. Chem. Soc.* **2016**, *138*, 13525



The rate of formation of **11** was obtained from the derivative of  $f(t)$  as following.

$$rate = \frac{d[\mathbf{11}]}{dt} = \frac{df(t)}{dt} = c_1 + 2c_2t + 3c_3t^2 + 4c_4t^3 + 5c_5t^4 + 6c_6t^5$$

**Table S-3.** Averages and standard errors of the rates at 50% formation of the cobalt tetrazido complex **11** as a function of [pyridine- $d_5$ ].

| Entry | [pyridine- $d_5$ ] (mM) | Rate (mM/min)            | Relative rates<br>$k_{rel}$ |
|-------|-------------------------|--------------------------|-----------------------------|
| 1     | 0                       | $2.03(6) \times 10^{-1}$ | 1.00 (def.)                 |
| 2     | 85                      | $1.33(6) \times 10^{-1}$ | 0.659(40)                   |
| 3     | 170                     | $9.06(2) \times 10^{-2}$ | 0.447(17)                   |
| 4     | 510                     | $3.12(1) \times 10^{-2}$ | 0.157(8)                    |
| 5     | 850                     | $2.21(3) \times 10^{-2}$ | 0.109(4)                    |

**E. Saturation kinetics in pyridine.** The rate of formation of **9** (< 10%) as a function of [pyridine-*d*<sub>5</sub>] was measured at 25 °C in benzene-*d*<sub>6</sub> with [2] = 4.25 mM and [7] = 85.0 mM.

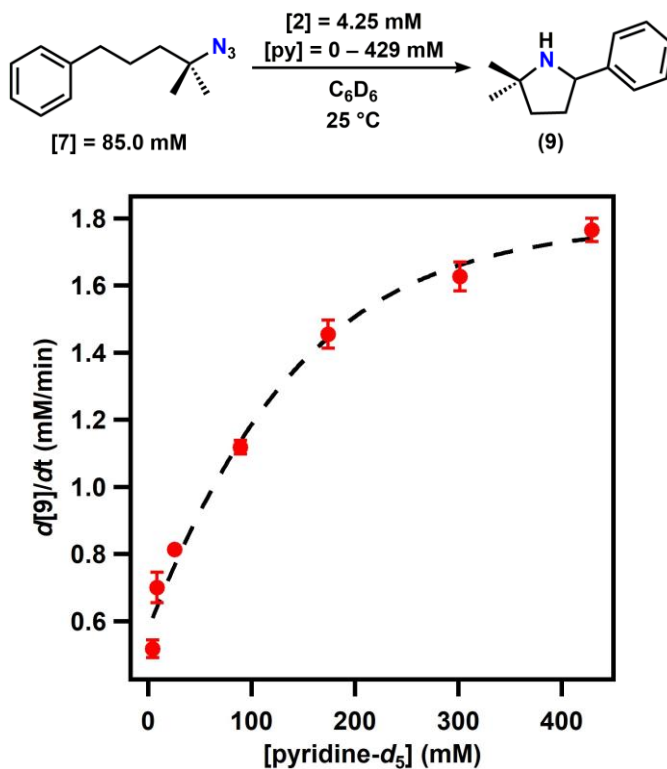

**Figure S-5.** Rate of formation of **9** (mM/min) versus [pyridine-*d*<sub>5</sub>] (mM).

**Table S-4.** Averages and standard errors of the observed initial rates of amination as a function of [pyridine-*d*<sub>5</sub>].

| Entry | [pyridine- <i>d</i> <sub>5</sub> ] (mM) | Rate (mM/min)             |
|-------|-----------------------------------------|---------------------------|
| 1     | 0                                       | N/A                       |
| 2     | 4.25                                    | $5.17(27) \times 10^{-1}$ |
| 3     | 8.50                                    | $7.00(45) \times 10^{-1}$ |
| 4     | 25.5                                    | $8.13(5) \times 10^{-1}$  |
| 5     | 89.3                                    | 1.12(2)                   |
| 6     | 174                                     | 1.45(4)                   |
| 7     | 302                                     | 1.63(4)                   |
| 8     | 429                                     | 1.77(3)                   |

## F. Job analysis.

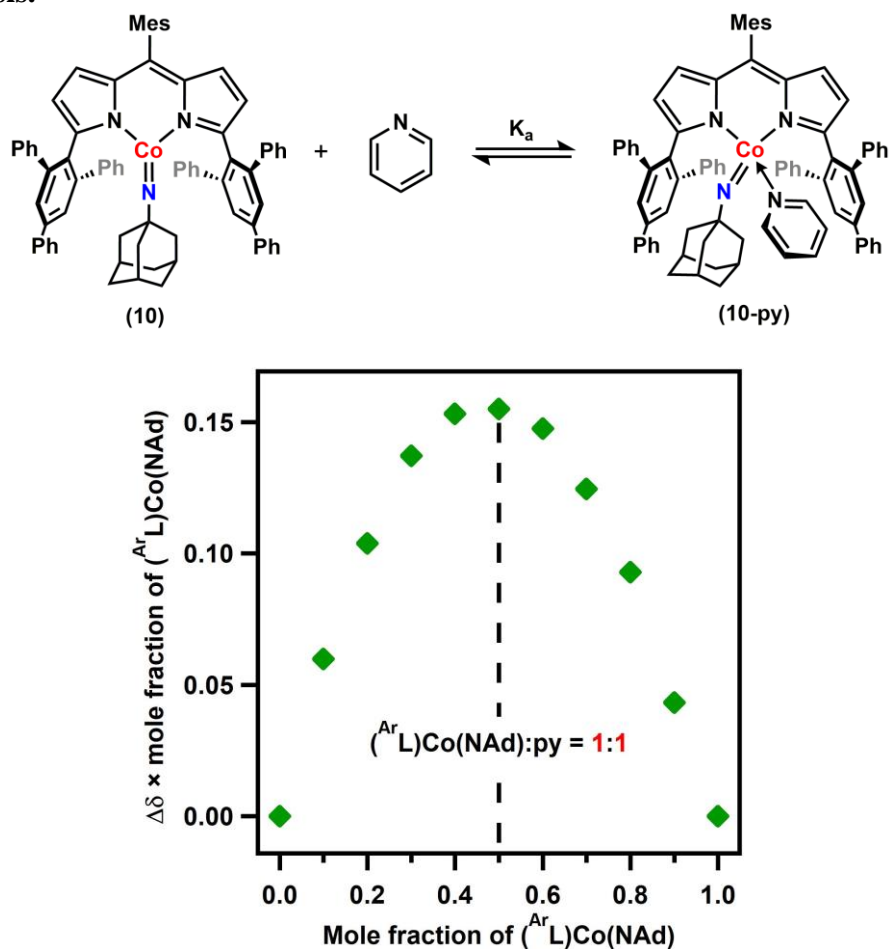

**Figure S-6.** Job plot obtained at 25 °C in benzene- $d_6$  with **[10]** + [pyridine] = 4.25 mM.

**Table S-5.** Chemical shifts (ppm) of **10** as a function of [pyridine] at 25 °C in benzene- $d_6$ .

| Entry | [10] (mM) | [pyridine] (mM) | Chemical shift (ppm) |
|-------|-----------|-----------------|----------------------|
| 1     | 4.250     | 0               | 19.88                |
| 2     | 3.825     | 0.425           | 19.83                |
| 3     | 3.400     | 0.850           | 19.77                |
| 4     | 2.975     | 1.275           | 19.70                |
| 5     | 2.550     | 1.700           | 19.64                |
| 6     | 2.125     | 2.125           | 19.57                |
| 7     | 1.700     | 2.550           | 19.50                |
| 8     | 1.275     | 2.975           | 19.43                |
| 9     | 0.850     | 3.400           | 19.36                |
| 10    | 0.425     | 3.825           | 19.28                |

**G.  $^1\text{H}$  NMR titration experiments.** A solution of ( $^{\text{Ar}}\text{L}$ )Co(NAd) **10** was prepared in benzene- $d_6$  and its concentration was maintained constant throughout the titration with pyridines. The chemical shifts corresponding to **10** as a function of the concentration of pyridines were fitted with a 1:1 binding isotherm by solving the following equations: (1)–(4);  $[\text{M}]_0$  is the total concentration of **10** and the corresponding pyridine-bound imido **10-py**;  $[\text{L}]_0$  is the total concentration of pyridine;  $[\text{ML}]$  is the concentration of **10-py**;  $[\text{M}]$  is the concentration of **10**;  $[\text{L}]$  is the concentration of free pyridine.  $\delta_{\text{free}}$  is the chemical shift of **10**;  $\delta_{\text{bound}}$  is the chemical shift of **10-py**.  $\delta_{\text{bound}}$  is estimated and obtained by fitting the titration curve.<sup>16</sup>

$$K_{\text{eq}} = \frac{[\text{ML}]}{[\text{M}][\text{L}]}$$

$$[\text{ML}] = [\text{M}]_0 - [\text{M}]$$

$$[\text{ML}] = \frac{([\text{M}]_0 + [\text{L}]_0 + K_{\text{eq}}^{-1}) - \sqrt{([\text{M}]_0 + [\text{L}]_0 + K_{\text{eq}}^{-1})^2 - 4[\text{M}]_0[\text{L}]_0}}{2}$$

$$\delta_{\text{obs}} = \frac{[\text{ML}]}{[\text{M}]_0} \delta_{\text{bound}} + \frac{[\text{M}]}{[\text{M}]_0} \delta_{\text{free}}$$

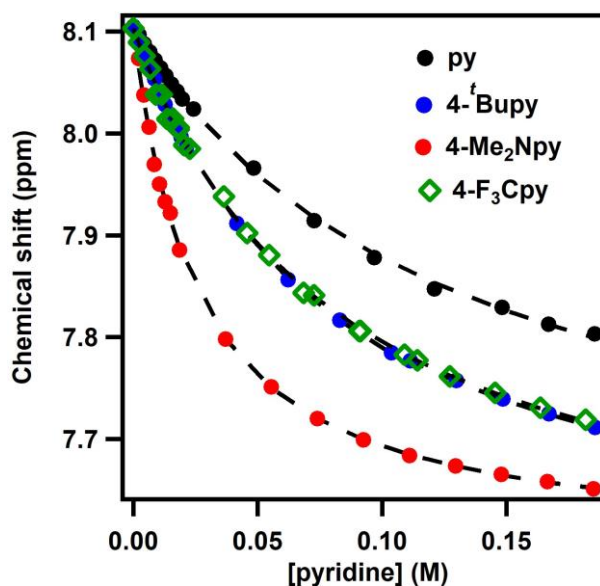

**Figure S-7.**  $^1\text{H}$  NMR titration curves of **10** with substituted pyridines. Chemical shifts (ppm) for **10** as a function of concentration of substituted pyridines at 25 °C in benzene- $d_6$ . Each black dashed line depicts a nonlinear regression fit to a 1:1 complexation model.

<sup>16</sup> Fielding, L. *Tetrahedron*. **2000**, 56, 6151

**Table S-6.** Calculated binding constants ( $K_a$ ) for 4-substituted pyridines using a nonlinear regression fit to a 1:1 complexation model.

| Entry | Substituted pyridine                                                              | $K_a$ ( $M^{-1}$ ) |
|-------|-----------------------------------------------------------------------------------|--------------------|
| 1     | 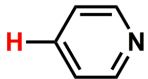 | 8.04               |
| 2     |  | 12.9               |
| 3     |  | 41.8               |
| 4     |  | 12.5               |

**H. Initial rate kinetics with 4-substituted pyridines.** The rate of formation of **9** (< 10%) in the presence of 4-substituted pyridines was measured at 25 °C in benzene-*d*<sub>6</sub> with [2] = 4.25 mM and [7] = 85.0 mM.

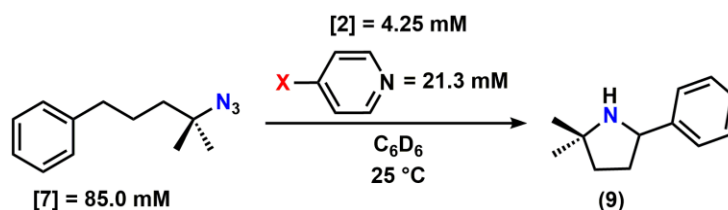

**Table S-7.** Averages and standard errors for the observed initial rates of C–H amination in the presence of substituted pyridines.

| Entry | Substituted pyridine                                                                | Rate (mM/min)             | Relative rate $k_X/k_H$ | Final yield (%) |
|-------|-------------------------------------------------------------------------------------|---------------------------|-------------------------|-----------------|
| 1     | 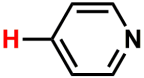  | $7.59(8) \times 10^{-1}$  | 1.00 (def.)             | 36.4            |
| 2     |  | 1.26(3)                   | 1.66(36)                | 89.4            |
| 3     |  | 2.36(2)                   | 3.11(68)                | 90.8            |
| 4     |  | $2.71(50) \times 10^{-1}$ | 0.357(16)               | 20.4            |

## I. Intermolecular kinetic isotope effect (KIE) study.

(A) The intermolecular KIE was determined by comparing the first order rate constants of the amination at 50 °C in benzene- $d_6$ .

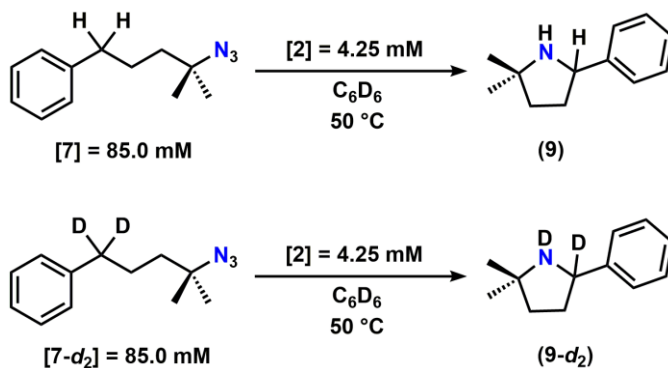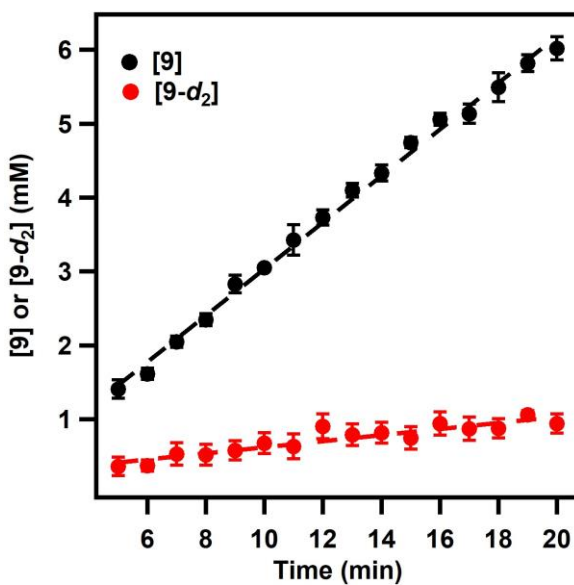

**Figure S-8.** Intermolecular KIE at 50 °C in benzene- $d_6$ .

$$k_H = 7.4(6) \times 10^{-2} \text{ (min}^{-1}\text{)}$$

$$k_D = 9.7(5) \times 10^{-3} \text{ (min}^{-1}\text{)}$$

$$\text{KIE} = k_H/k_D = 7.6(2)$$

(B) The intermolecular KIE in the presence of pyridine was determined by comparing the first order rate constants of the amination at 25 °C in benzene-*d*<sub>6</sub>.

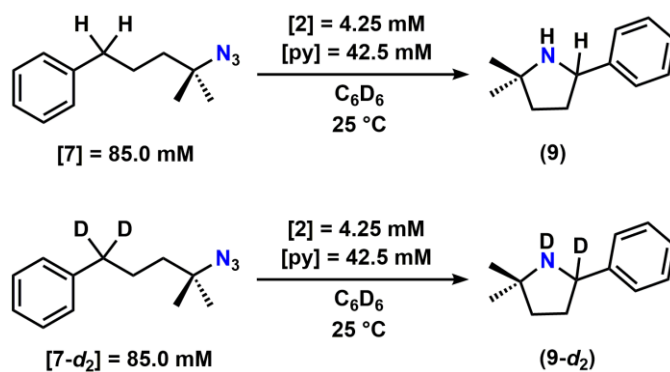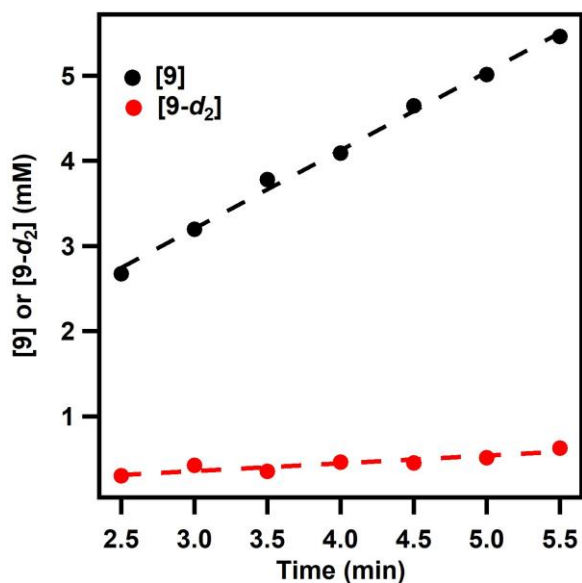

**Figure S-9.** Intermolecular KIE at 25 °C in benzene-*d*<sub>6</sub> with [pyridine] = 42.5 mM.

$$k_{\text{H}} = 2.16(9) \times 10^{-2} \text{ (min}^{-1}\text{)}$$

$$k_{\text{D}} = 2.1(8) \times 10^{-3} \text{ (min}^{-1}\text{)}$$

$$\text{KIE} = k_{\text{H}}/k_{\text{D}} = 10.2(9)$$



### J. Intramolecular kinetic isotope effect.

(A) The KIE obtained upon the intramolecular competition was determined by measuring the ratio between the  $P_H$  and  $P_D$  using  $^1H$  NMR integration. In order to completely exclude the off-cycle reaction (i.e., formation of the tetrazido complex) this experiment was performed using a stoichiometric amount of ( $^{Ar}L$ )Co **2**. A KIE value of 2.70(7) was found.

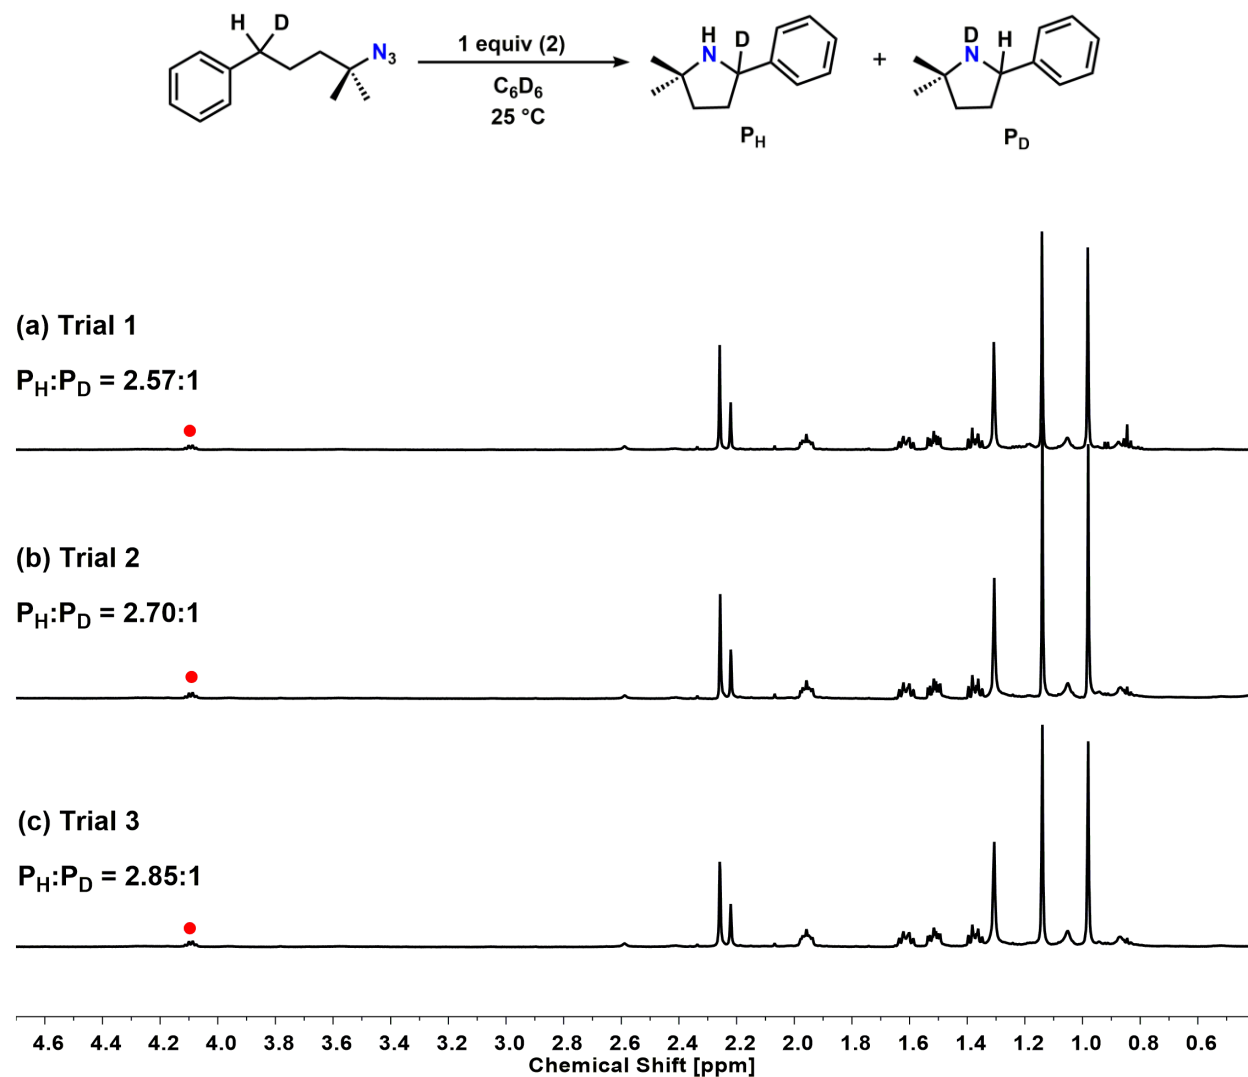

**Figure S-10.**  $^1H$  NMR spectra showing the distributions of  $P_H$  and  $P_D$ . The highlighted peak at 4.10 ppm corresponds to  $P_D$  and was used for the quantification of each of the products.

(B) The intramolecular competition KIE in the presence of 10 equivalents of DMAP was determined by measuring the ratio between the  $P_H$  and  $P_D$  using  $^1H$  NMR integration. In order to completely exclude the off-cycle reaction (i.e., formation of the tetrazido complex) this experiment was performed using a stoichiometric amount of ( $^{Ar}L$ )Co **2**. A KIE value of 2.87(6) was found.

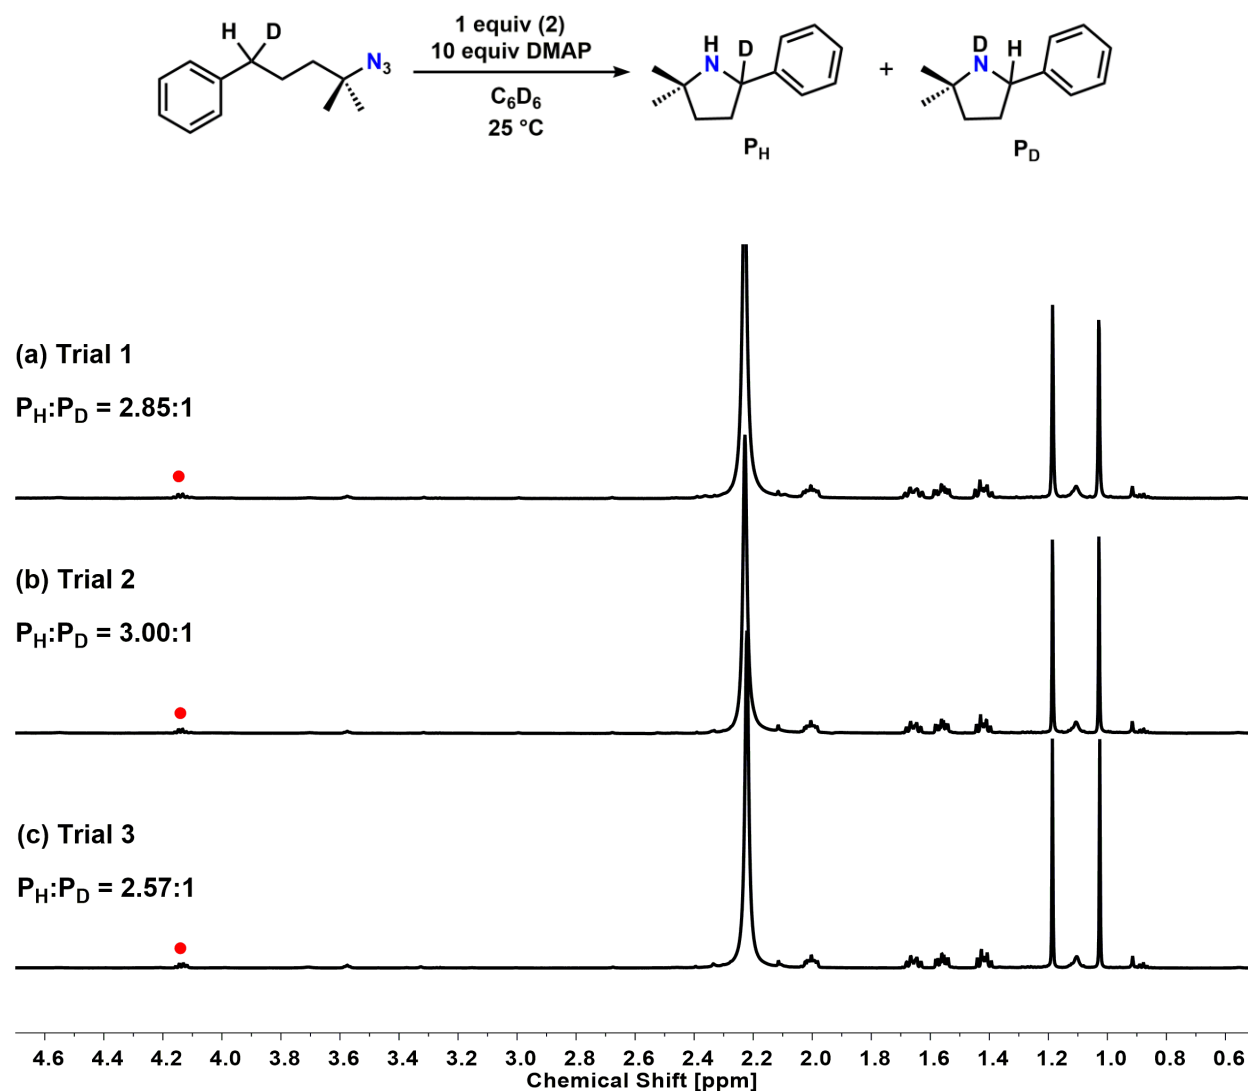

**Figure S-11.**  $^1H$  NMR spectra showing the distributions of  $P_H$  and  $P_D$ . The highlighted peak at 4.10 ppm corresponds to  $P_D$  and was used for the quantification of each of the products. The singlet at 2.23 ppm is from the  $-CH_3$  groups of DMAP.

**K. Initial rate kinetics with para-substituted azide substrates.** The initial rates of amination for *para*-substituted azide substrates (**7-X**) were measured at 25 °C in benzene-*d*<sub>6</sub> with **[2]** = 4.25 mM and [pyridine] = 42.5 mM.

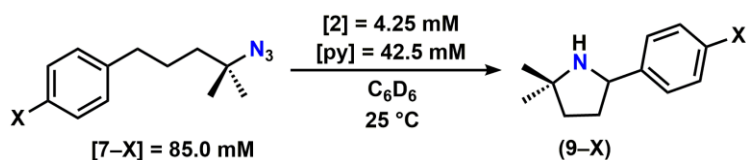

**Table S-8.** Averages and standard errors of the observed initial rates for *para*-substituted azide substrates.

| Entry | <i>para</i> substituent (X) | Rate (mM/min)            |
|-------|-----------------------------|--------------------------|
| 1     | H                           | $9.18(9) \times 10^{-1}$ |
| 2     | <i>p</i> -CH <sub>3</sub>   | 1.02(3)                  |
| 3     | <i>p</i> -OCH <sub>3</sub>  | 1.28(2)                  |
| 4     | <i>p</i> -CF <sub>3</sub>   | 1.29(5)                  |

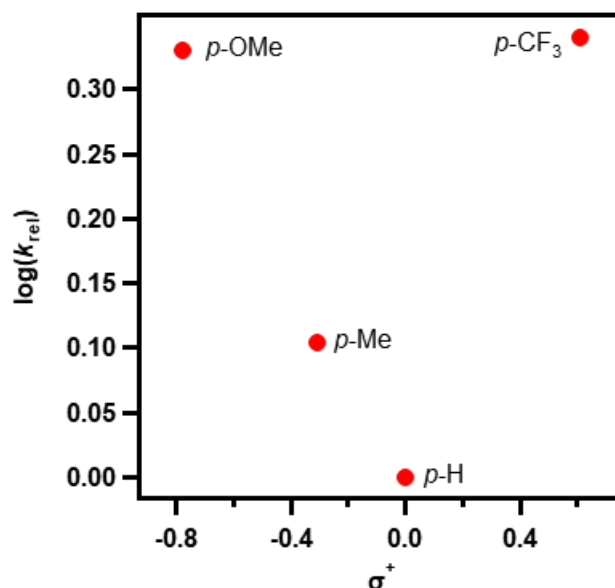

**Figure S-12.** Free-energy correlation of  $\log(k_{rel})$  vs.  $\sigma^+$ .

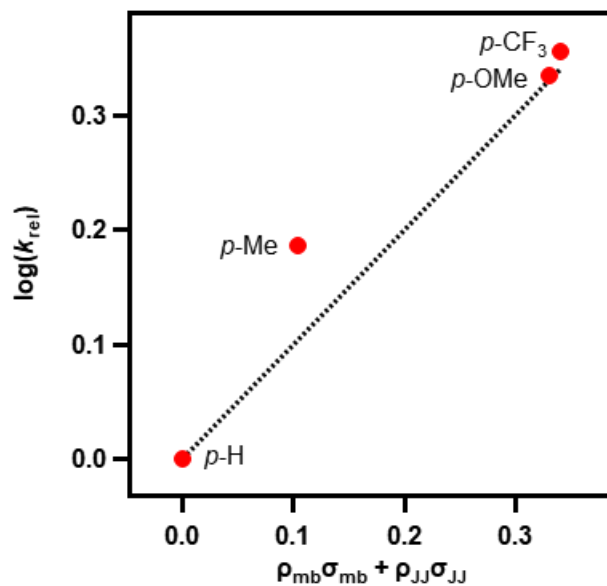

**Figure S-13.** Linear-free-energy correlation of  $\log(k_{rel})$  vs.  $(\sigma_{mb}$  and  $\sigma_{JJ})$ .  $\rho_{mb} = -0.25$  and  $\rho_{JJ}^* = 0.72$ .<sup>17</sup>

<sup>17</sup> Jiang, X.-K. *Acc. Chem. Res.*, **1997**, 30, 283

**L. Solution magnetic moment.** The magnetic moment of imido **10** was measured as a function of [4-Me<sub>2</sub>Npy] at 25 °C in benzene-*d*<sub>6</sub> using (trifluoromethyl)benzene as a reference for <sup>19</sup>F NMR. The individual magnetic moments,  $\mu'_{\text{eff}}$  and  $\mu''_{\text{eff}}$  resulting from **10** and **10-(4-Me<sub>2</sub>Npy)**, respectively were calculated based on the following equation using the binding constant ( $K_a$ ) of 4-Me<sub>2</sub>Npy at 25 °C.  $\chi_{10}$  and  $\chi_{10-(4\text{-Me}_2\text{Npy})}$  represent mole fractions of **10** and **10-(4-Me<sub>2</sub>Npy)**, respectively at certain concentrations of 4-Me<sub>2</sub>Npy.

$$\text{Total } \mu_{\text{eff}} = \mu'_{\text{eff}}(\chi_{10}) + \mu''_{\text{eff}}(\chi_{10-(4\text{-Me}_2\text{Npy})})$$

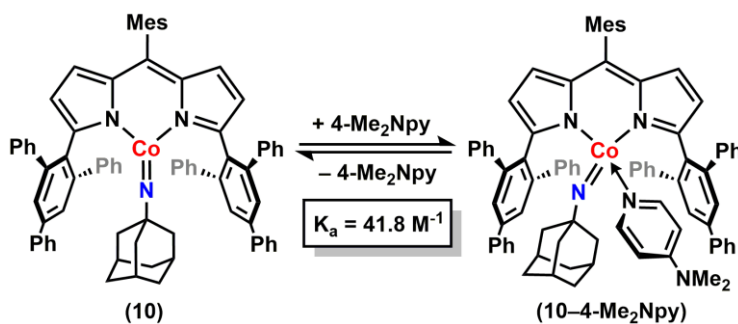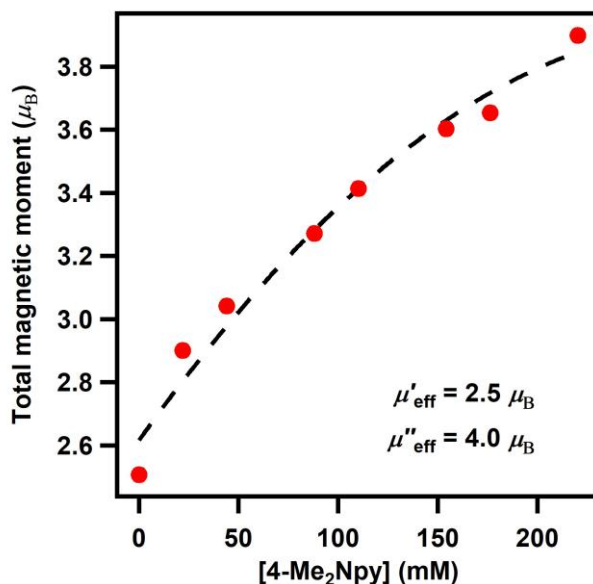

**Figure S-14.** Solution magnetic moments of a mixture of **10** and **10-(4-Me<sub>2</sub>Npy)** as a function of [4-Me<sub>2</sub>Npy] at 25 °C in benzene-*d*<sub>6</sub>.

## Characterization of Substituted Pyrrolidines.

**Catalytic reactions.** Under N<sub>2</sub> atmosphere, (<sup>Ar</sup>L)Co (8.50 mM in benzene) and the desired 4-phenyl substituted azide (10 equiv, 85.0 mM in benzene) were added to an oven-dried pressure vessel. The reaction mixture was heated to 80 °C for 12 hours. The crude reaction mixture was concentrated via rotary evaporation and the desired substituted pyrrolidine was isolated via a flash silica chromatography using (EtOAc:MeOH:NH<sub>4</sub>OH = 10:1:0.1) as an eluent. Since the purpose of such catalytic runs was to characterize the desired pyrrolidines from the corresponding azide substrate which are used for the kinetic analysis, the reactions were not conducted under the optimized conditions (i.e., in the presence of pyridine).

### (1) 2,2,5-trimethylpyrrolidine

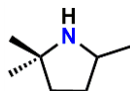

Spectral data were consistent with previously reported characterization of the product.<sup>18</sup>

### (2) 2,2,5,5-tetramethylpyrrolidine

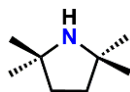

Spectral data were consistent with previously reported characterization of the product.<sup>19</sup>

### (3) 2,2-dimethyl-5-phenylpyrrolidine

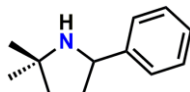

<sup>1</sup>H NMR (600 MHz, CDCl<sub>3</sub>) δ/ppm: 7.37 (m, 2 H), 7.31 (t, 2 H), 7.21 (t, 1 H), 4.31 (t, 1 H), 2.22–2.27 (m, 1 H), 1.79–1.85 (m, 1 H), 1.71–1.77 (m, 2 H), 1.29 (s, 3 H), 1.25 (s, 3 H). <sup>13</sup>C{<sup>1</sup>H} NMR

<sup>18</sup> Moffett, R. B.; White, J. L. *J. Org. Chem.* **1952**, *17*, 407

<sup>19</sup> Hodgson, D. M.; Bray, C. D.; Kindon, N. D.; Reynolds, N. J.; Coote, S. J.; Um, J. M.; Houk, K. N. *J. Org. Chem.* **2009**, *74*, 1019

(125 MHz, CDCl<sub>3</sub>)  $\delta$ /ppm: 145.37, 128.46, 126.84, 126.70, 62.23, 59.34, 40.36, 35.28, 30.77, 29.70. **HRMS** (ESI<sup>+</sup>)  $m/z$  Calc. 176.1434 [C<sub>12</sub>H<sub>17</sub>N+H]<sup>+</sup>, Found. 176.1433 [M+H]<sup>+</sup>.

**(4) 2,2-dimethyl-5-(*p*-tolyl)pyrrolidine**

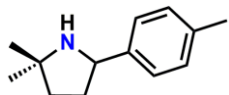

**<sup>1</sup>H NMR** (600 MHz, CDCl<sub>3</sub>)  $\delta$ /ppm: 7.25 (d, 2 H), 7.13 (d, 2 H), 4.27 (t, 1 H), 2.32 (s, 3 H), 2.19–2.25 (m, 1 H), 1.77–1.83 (m, 1 H), 1.69–1.76 (m, 2 H), 1.28 (s, 3 H), 1.24 (s, 3 H). **<sup>13</sup>C{<sup>1</sup>H} NMR** (125 MHz, CDCl<sub>3</sub>)  $\delta$ /ppm: 142.28, 136.37, 129.13, 126.60, 62.01, 59.31, 40.41, 35.30, 30.77, 29.72, 21.18. **HRMS** (ESI<sup>+</sup>)  $m/z$  Calc. 190.1590 [C<sub>13</sub>H<sub>19</sub>N+H]<sup>+</sup>, Found. 190.1588 [M+H]<sup>+</sup>.

**(5) 5-(4-methoxyphenyl)-2,2-dimethylpyrrolidine**

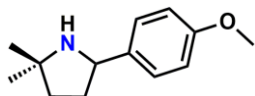

**<sup>1</sup>H NMR** (600 MHz, CDCl<sub>3</sub>)  $\delta$ /ppm: 7.32 (d, 2 H), 6.86 (d, 2 H), 4.35 (t, 1 H), 3.79 (s, 3 H), 2.21–2.26 (m, 1 H), 1.87–1.94 (m, 1 H), 1.74–1.83 (m, 2 H), 1.30 (s, 3 H), 1.28 (s, 3 H). **<sup>13</sup>C{<sup>1</sup>H} NMR** (125 MHz, CDCl<sub>3</sub>)  $\delta$ /ppm: 142.28, 136.37, 129.13, 126.60, 62.01, 59.31, 40.41, 35.30, 30.77, 29.72, 21.18. **HRMS** (ESI<sup>+</sup>)  $m/z$  Calc. 206.1539 [C<sub>13</sub>H<sub>19</sub>NO+H]<sup>+</sup>, Found. 206.1537 [M+H]<sup>+</sup>.

**(6) 2,2-dimethyl-5-(4-(trifluoromethyl)phenyl)pyrrolidine**

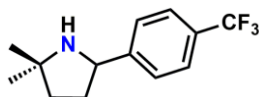

**<sup>1</sup>H NMR** (600 MHz, CDCl<sub>3</sub>)  $\delta$ /ppm: 7.49–7.56 (m, 4 H), 4.39 (t, 1 H), 2.26–2.30 (m, 1 H), 1.70–1.78 (m, 3 H), 1.28 (s, 3 H), 1.27 (s, 3 H). **<sup>13</sup>C{<sup>1</sup>H} NMR** (125 MHz, CDCl<sub>3</sub>)  $\delta$ /ppm: 150.06, 128.56 (q,  $J_{C-F}$  = 32.3 Hz), 126.92, 125.25 (q,  $J_{C-F}$  = 3.77 Hz), 121.21 (q,  $J_{C-F}$  = 271.8 Hz), 61.51, 59.36, 40.08, 35.34, 30.81, 29.67. **HRMS** (ESI<sup>+</sup>)  $m/z$  Calc. 244.1308 [C<sub>13</sub>H<sub>16</sub>F<sub>3</sub>N+H]<sup>+</sup>, Found. 244.1303 [M+H]<sup>+</sup>.

### <sup>1</sup>H NMR Spectra of Metal Compounds.

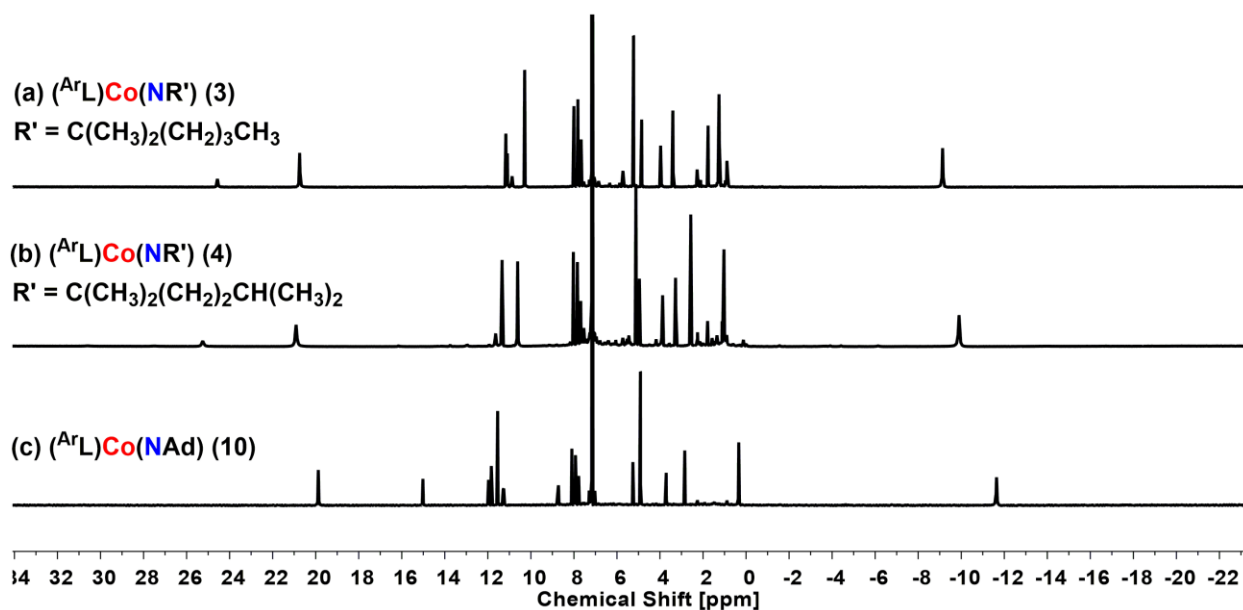

**Figure S-15.** <sup>1</sup>H NMR spectra of a series of cobalt alkyl imidos in benzene-*d*<sub>6</sub>.

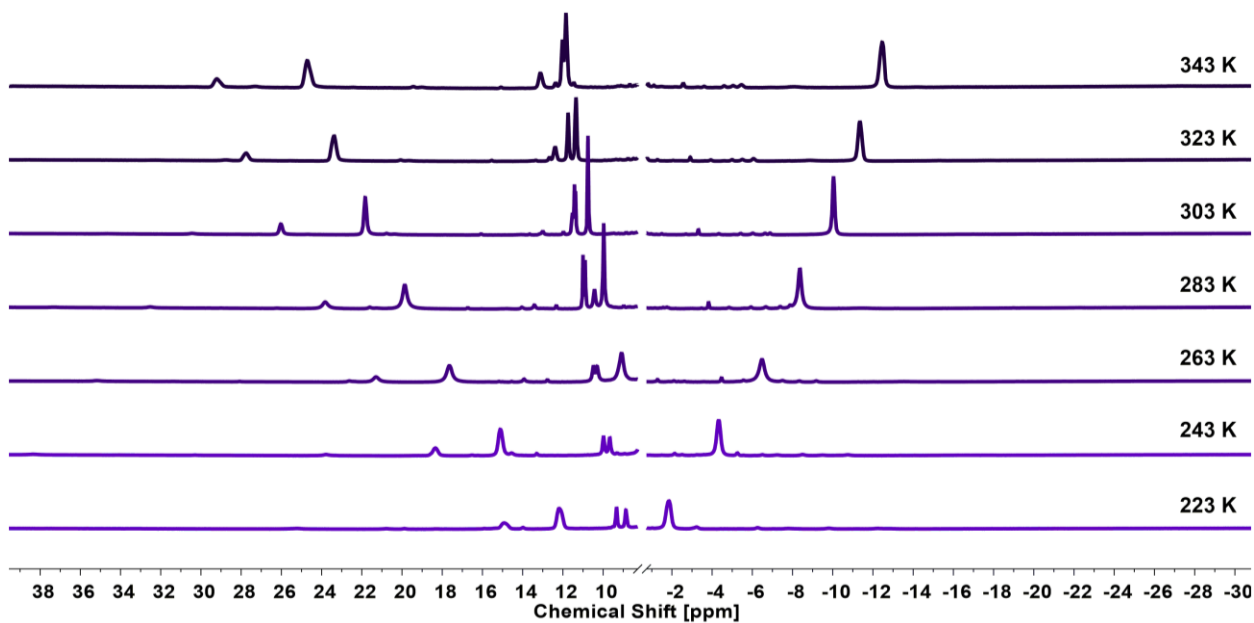

**Figure S-16.** Variable temperature <sup>1</sup>H NMR spectra of imido complex **3** in toluene-*d*<sub>8</sub> exhibiting a similar temperature dependent feature with the one observed from the previously reported Co<sup>III</sup> imido (<sup>Ar</sup>L)Co(N<sup>t</sup>Bu).<sup>20</sup>

<sup>20</sup> King, E.R.; Sazama, G.T.; Betley, T.A. *J. Am. Chem. Soc.* **2012**, *134*, 17858



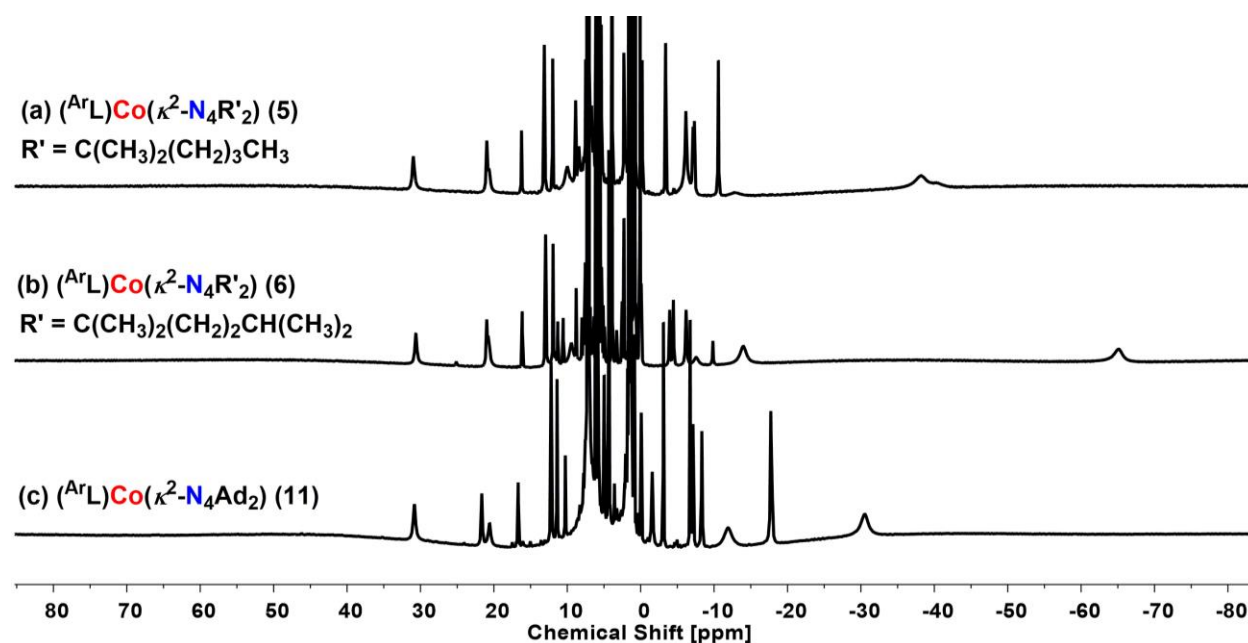

**Figure S-17.**  $^1\text{H}$  NMR spectra of a series of cobalt tetrazido complexes in benzene- $d_6$ .

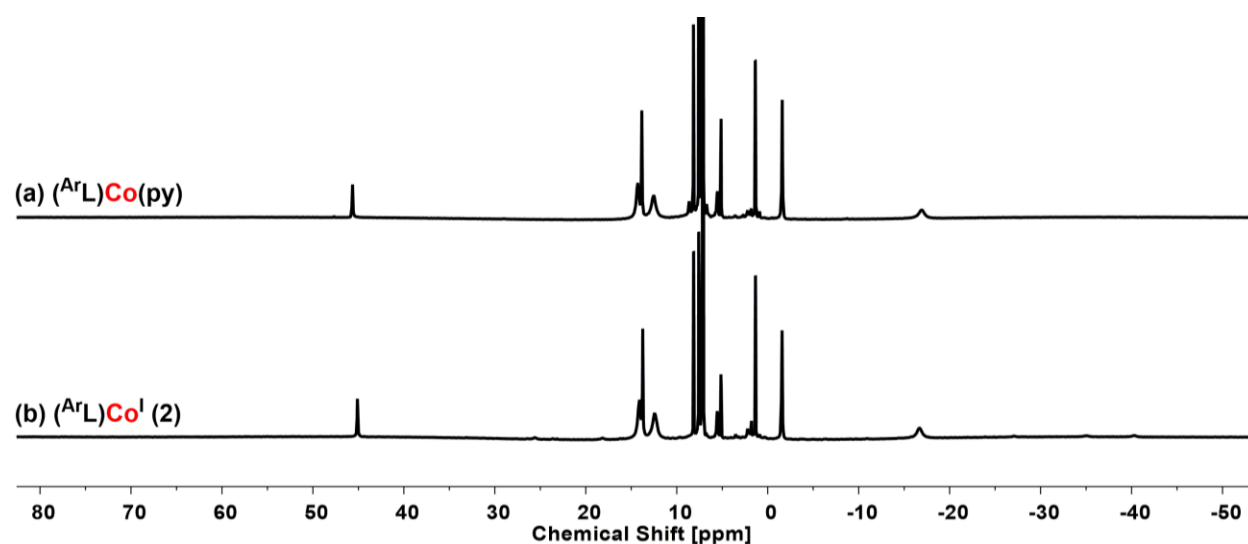

**Figure S-18.**  $^1\text{H}$  NMR spectra of  $(^{\text{Ar}}\text{L})\text{Co}(\text{py})$  and  $(^{\text{Ar}}\text{L})\text{Co}$  2 in benzene- $d_6$ .

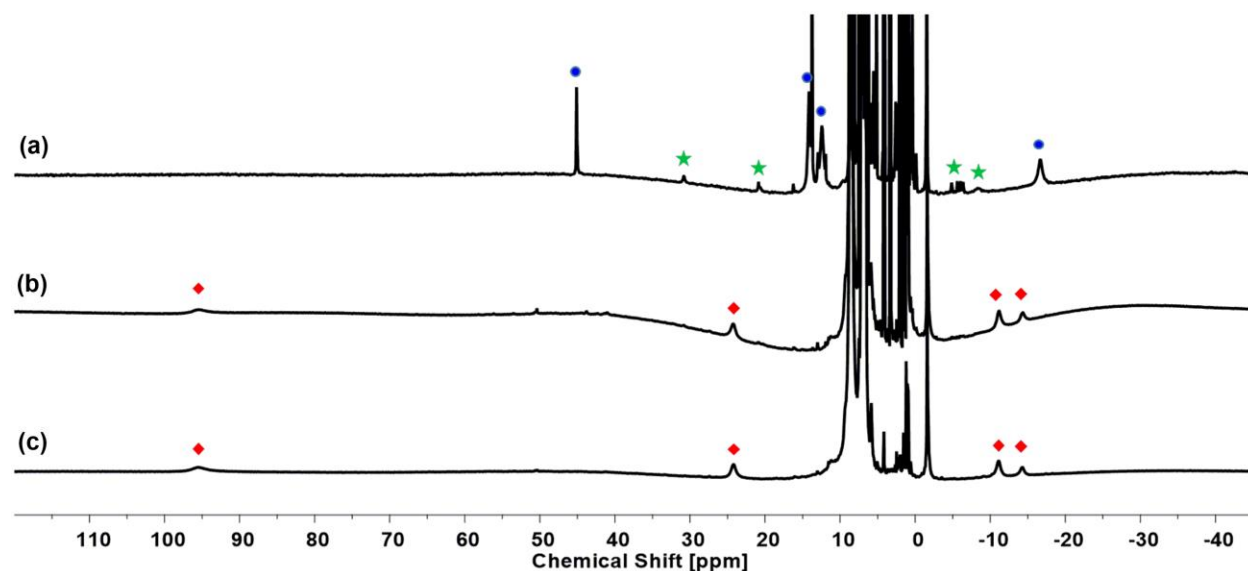

**Figure S-19.**  $^1\text{H}$  NMR spectra of  $(^{\text{Ar}}\text{L})\text{Co}(\text{py})$  and  $(^{\text{Ar}}\text{L})\text{Co}(\text{py})_2$ . (A)  $^1\text{H}$  NMR spectrum of a catalytic reaction (5 mol% of **2** at 80 °C) in benzene- $d_6$  after full consumption of **7** in the presence of 10 equiv of pyridine- $d_5$ . Blue markers indicate peaks from  $(^{\text{Ar}}\text{L})\text{Co}(\text{py})$  and green markers indicate peaks from the corresponding cobalt tetrazido complex  $(^{\text{Ar}}\text{L})\text{Co}(\kappa^2\text{-N}_4\text{R}_2)$ . (B)  $^1\text{H}$  NMR spectrum of a catalytic reaction (5 mol% of **2** at 80 °C) in benzene- $d_6$  after full consumption of **7** in the presence of 100 equiv of pyridine- $d_5$ . (C)  $^1\text{H}$  NMR spectrum of  $(^{\text{Ar}}\text{L})\text{Co}$  in the presence of 100 equiv of  $d_5$ -pyridine in benzene- $d_6$ . Red markers indicate peaks from  $(^{\text{Ar}}\text{L})\text{Co}(\text{py})_2$ .

# NMR Spectra of Organoazides and Substituted Pyrrolidines.

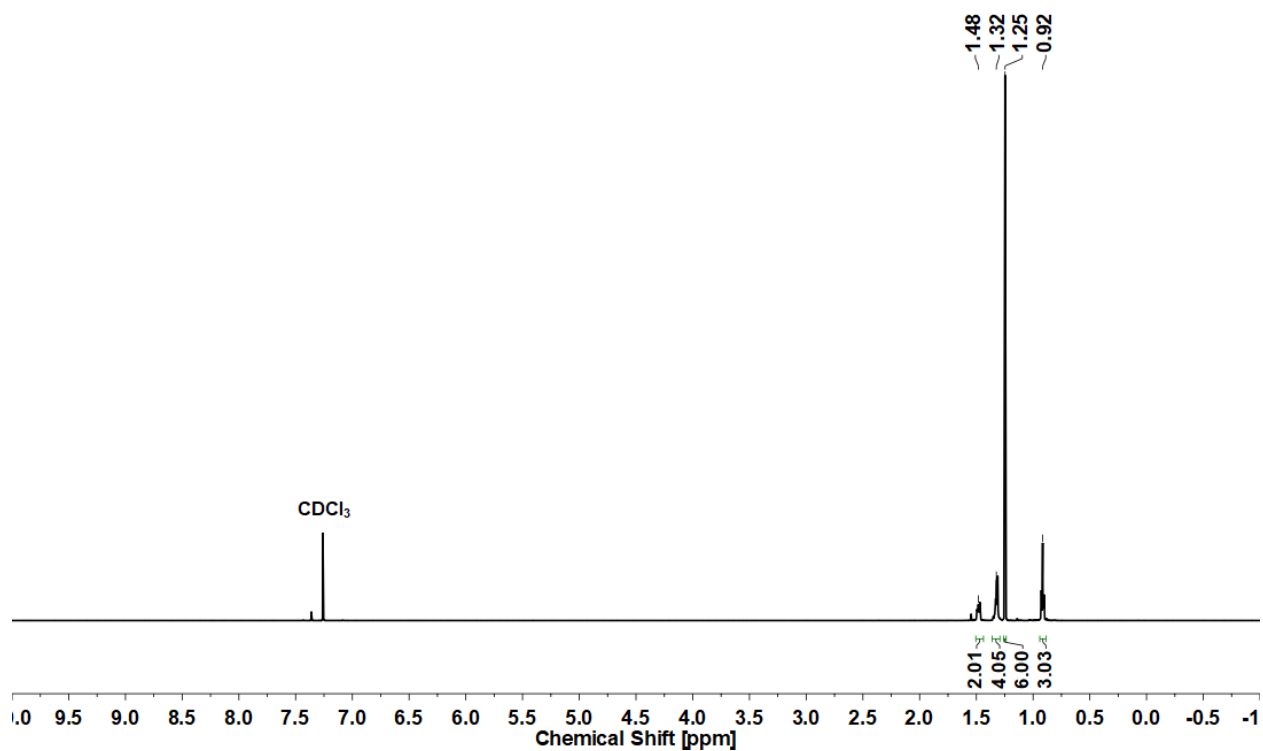

**Figure S-20.** <sup>1</sup>H NMR spectrum of 2-azido-2-methylhexane in chloroform-*d*.

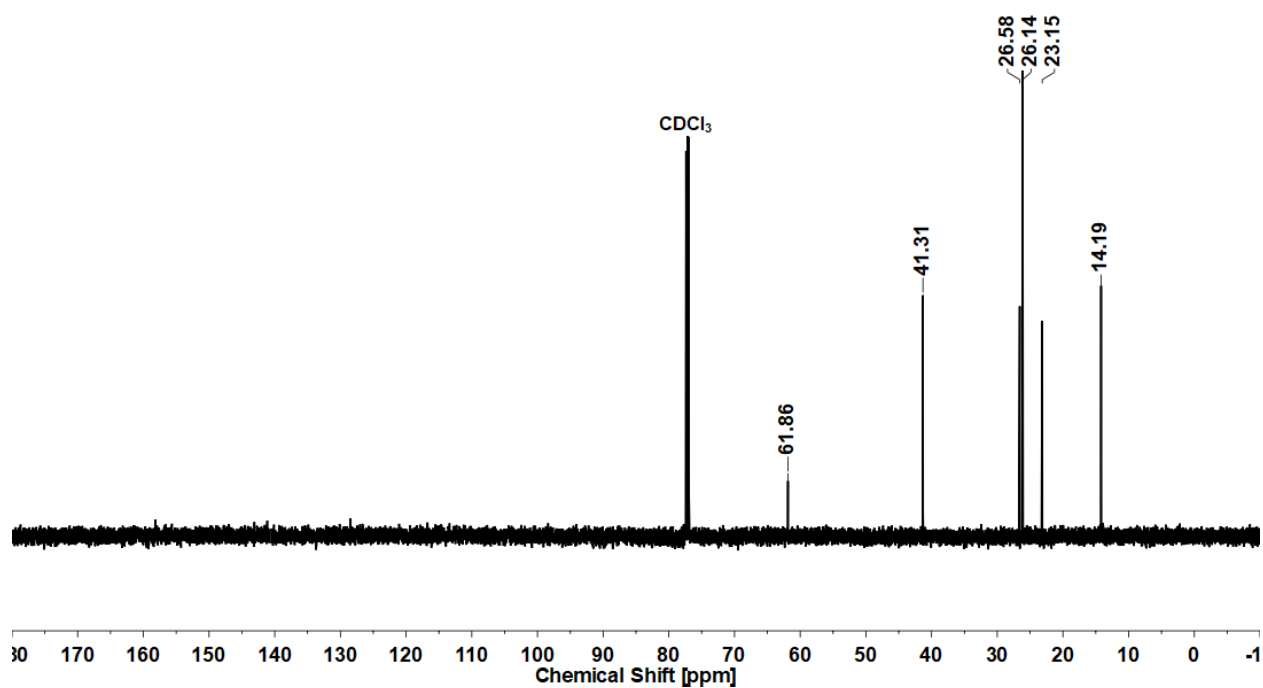

**Figure S-21.** <sup>13</sup>C{<sup>1</sup>H} NMR spectrum of 2-azido-2-methylhexane in chloroform-*d*.

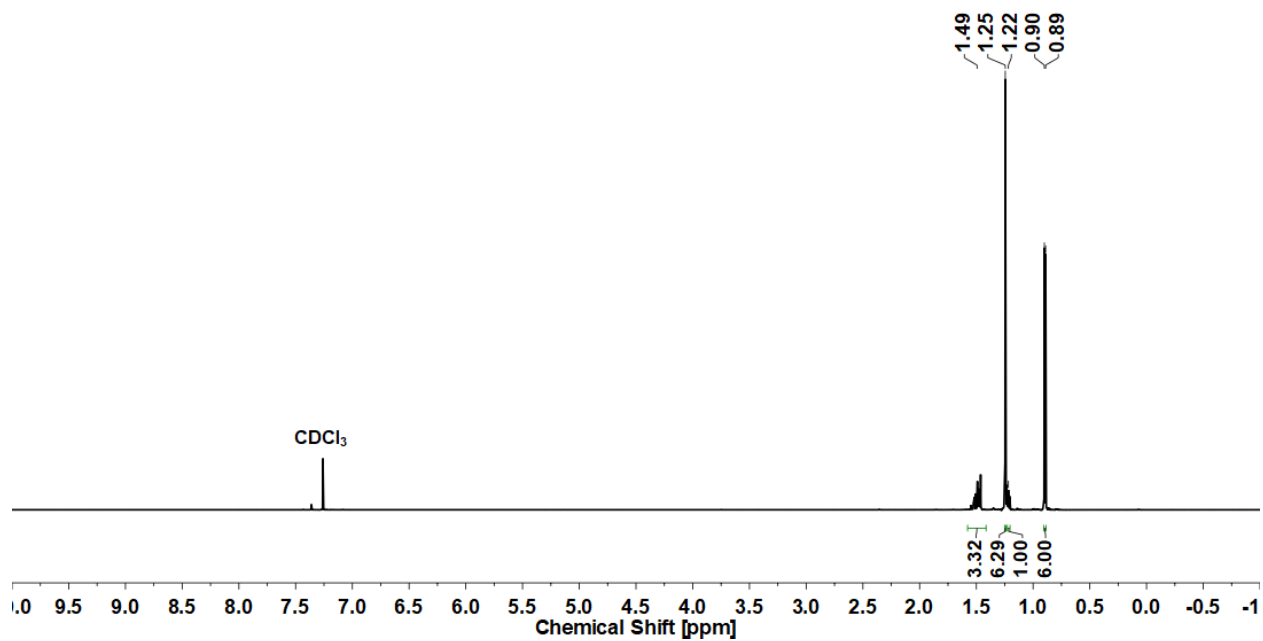

**Figure S-22.** <sup>1</sup>H NMR spectrum of 2-azido-2,5-dimethylhexane in chloroform-*d*.

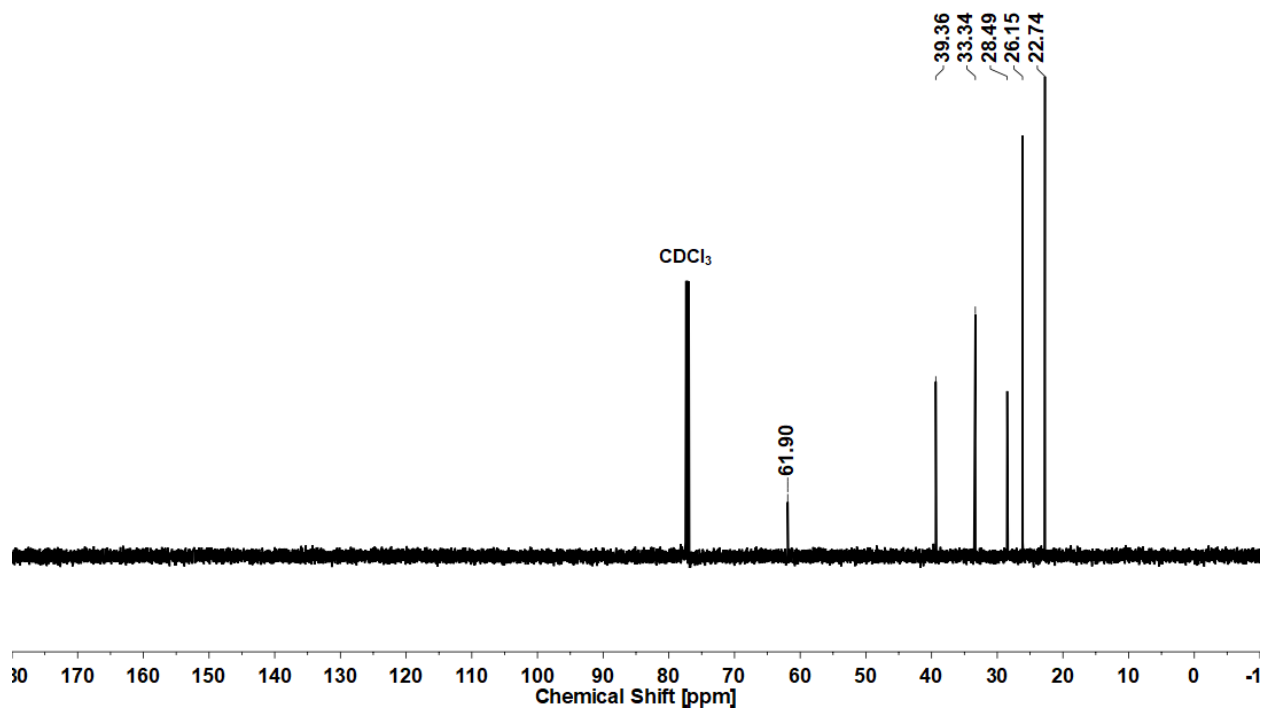

**Figure S-23.** <sup>13</sup>C{<sup>1</sup>H} NMR spectrum of 2-azido-2,5-dimethylhexane in chloroform-*d*.

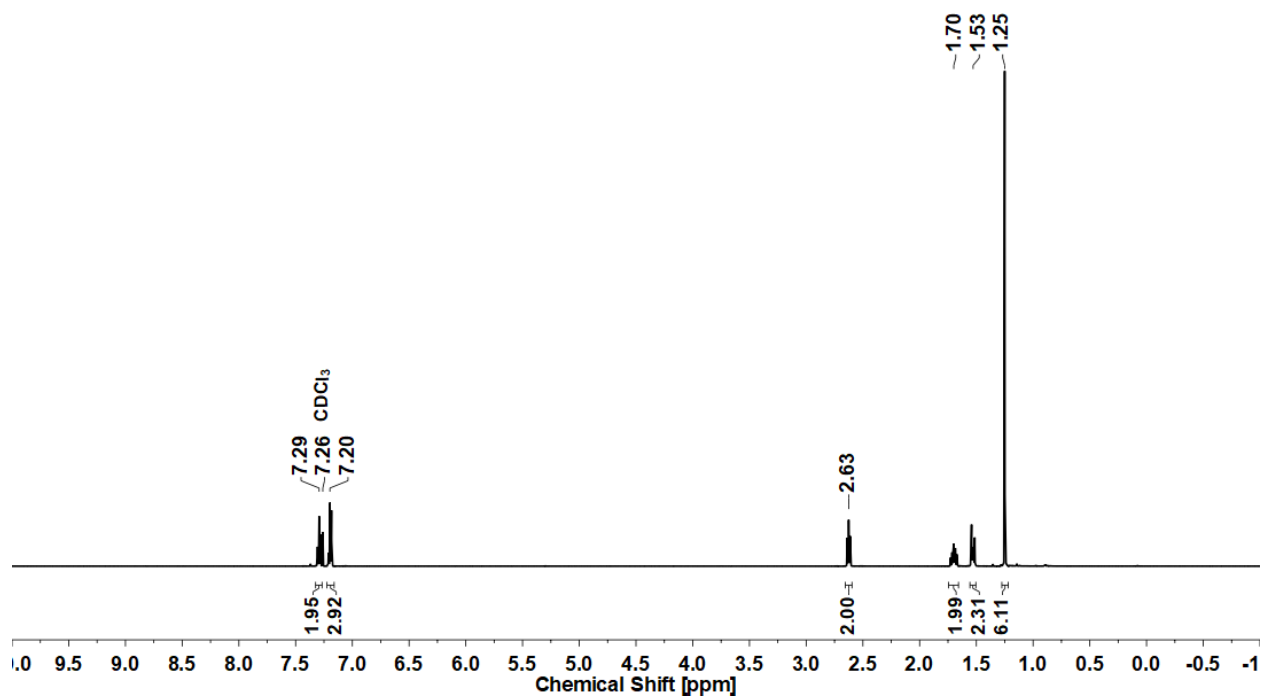

**Figure S-24.** <sup>1</sup>H NMR spectrum of (4-azido-4-methylpentyl)benzene in chloroform-*d*.

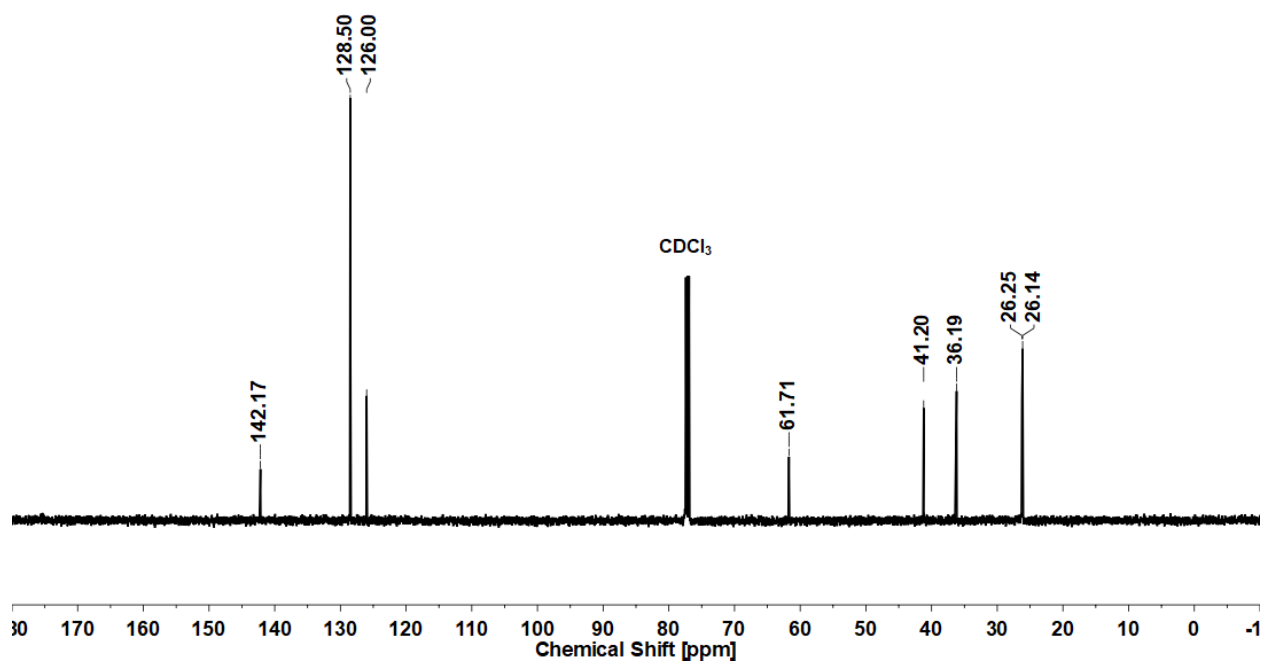

**Figure S-25.** <sup>13</sup>C{<sup>1</sup>H} NMR spectrum of (4-azido-4-methylpentyl)benzene in chloroform-*d*.

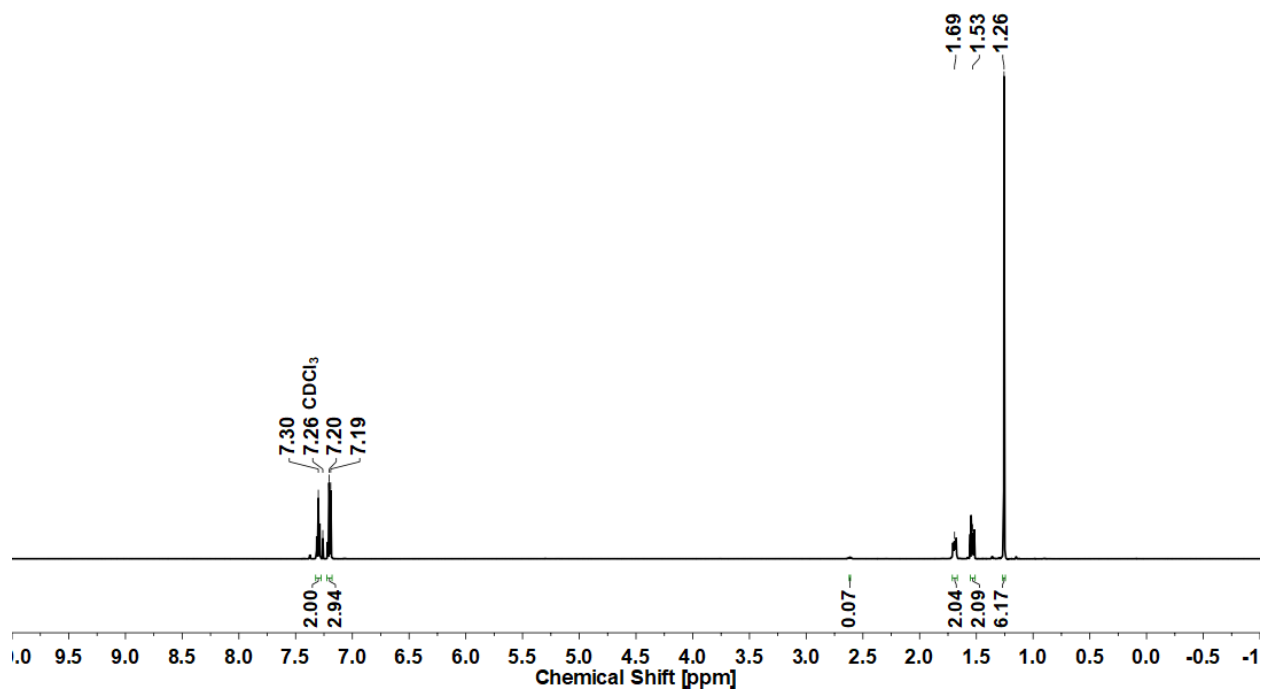

**Figure S-26.** <sup>1</sup>H NMR spectrum of (4-azido-4-methylpentyl-1,1-*d*<sub>2</sub>)benzene in chloroform-*d*.

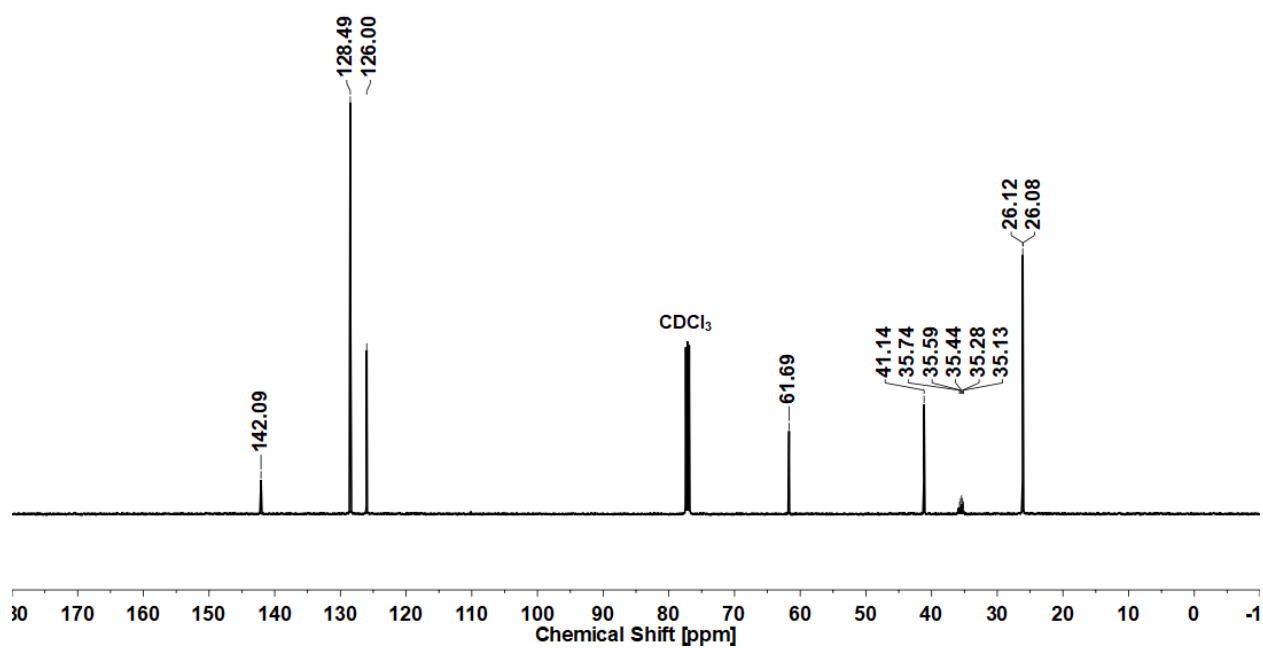

**Figure S-27.** <sup>13</sup>C{<sup>1</sup>H} NMR spectrum of (4-azido-4-methylpentyl-1,1-*d*<sub>2</sub>)benzene in chloroform-*d*.

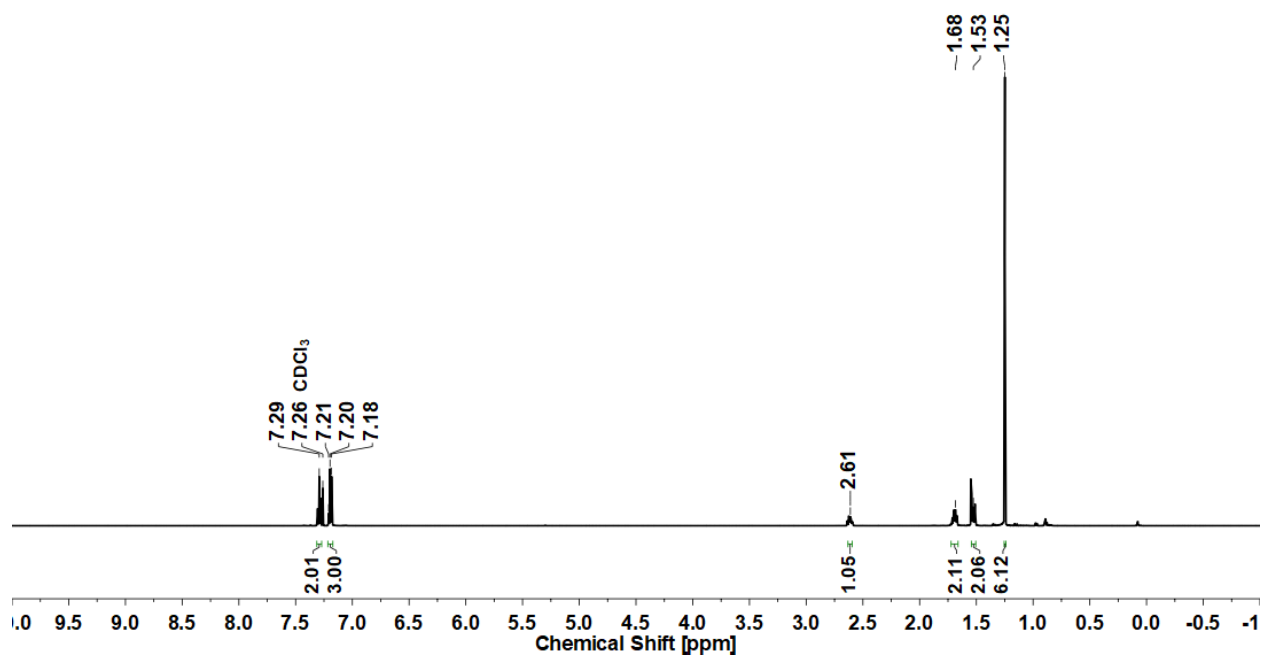

**Figure S-28.** <sup>1</sup>H NMR spectrum of (4-azido-4-methylpentyl-1-*d*)benzene in chloroform-*d*.

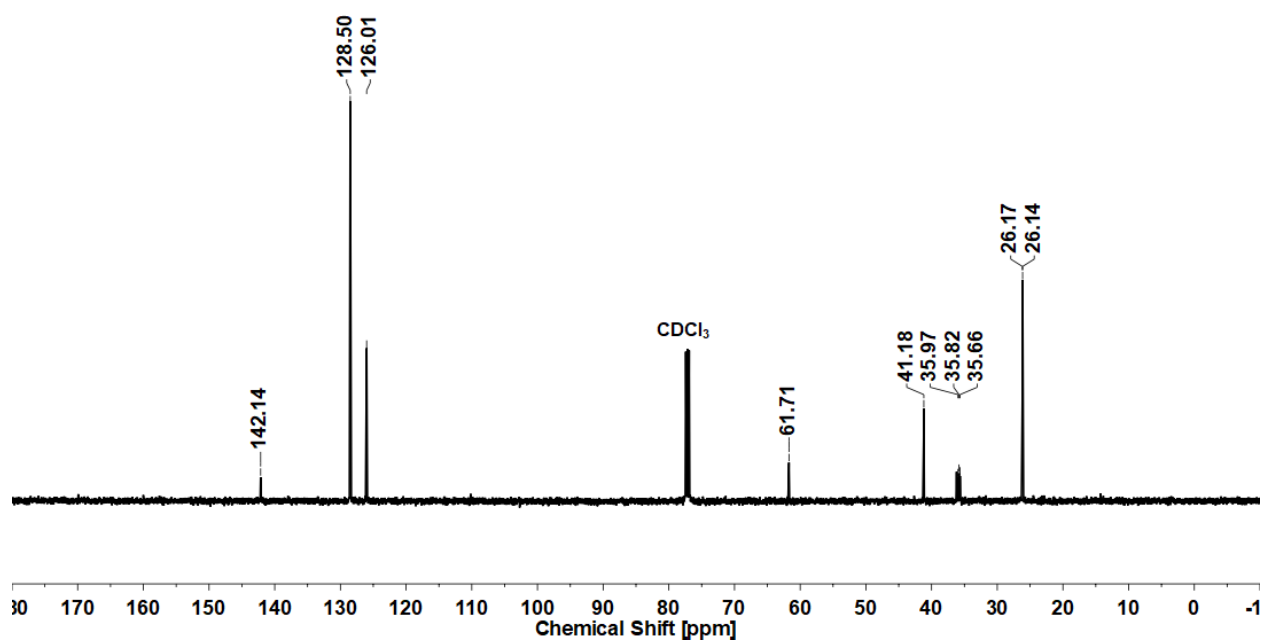

**Figure S-29.** <sup>13</sup>C{<sup>1</sup>H} NMR spectrum of (4-azido-4-methylpentyl-1-*d*)benzene in chloroform-*d*.

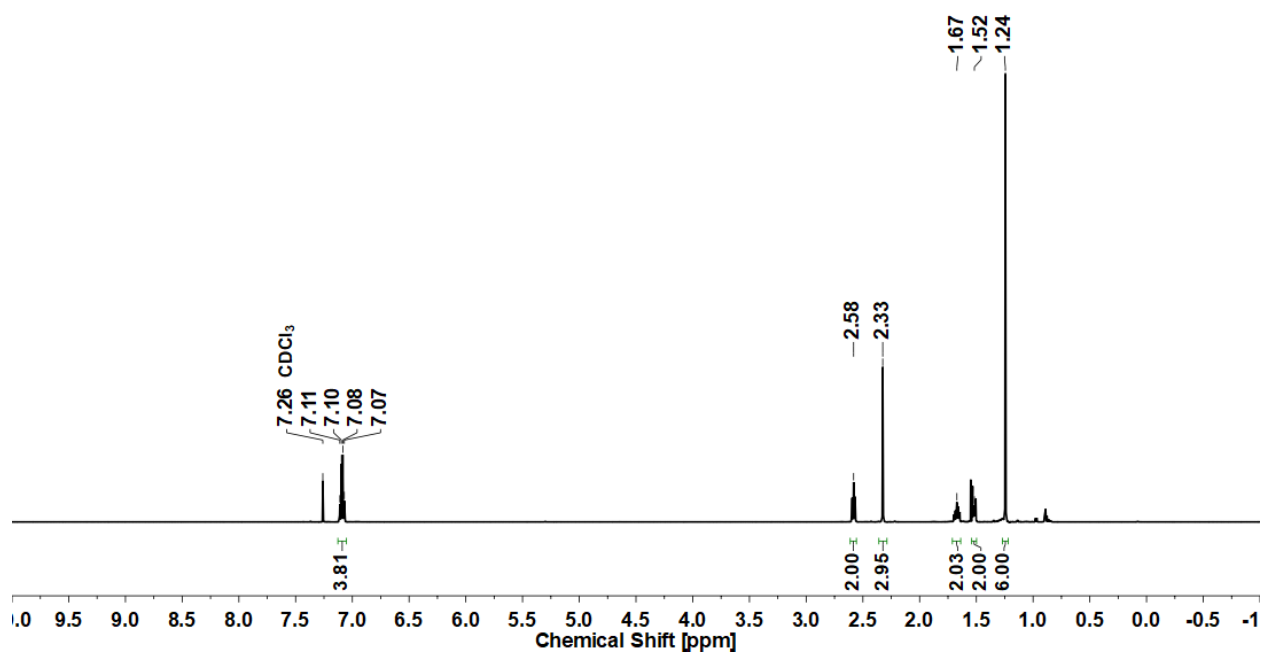

**Figure S-30.** <sup>1</sup>H NMR spectrum of 1-(4-azido-4-methylpentyl)-4-methylbenzene in chloroform-*d*.

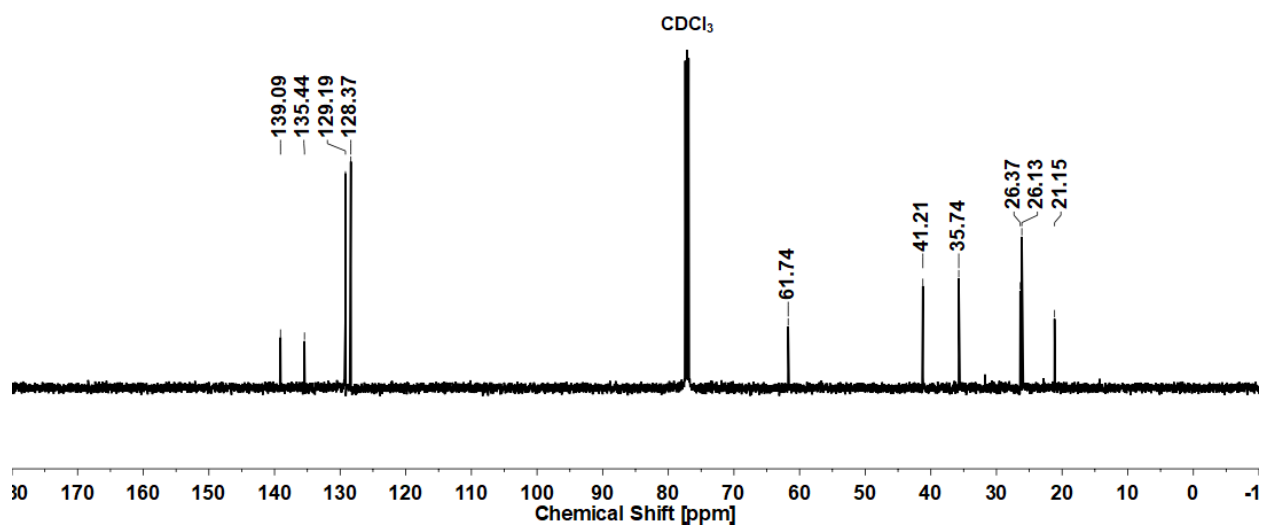

**Figure S-31.** <sup>13</sup>C{<sup>1</sup>H} NMR spectrum of 1-(4-azido-4-methylpentyl)-4-methylbenzene in chloroform-*d*.



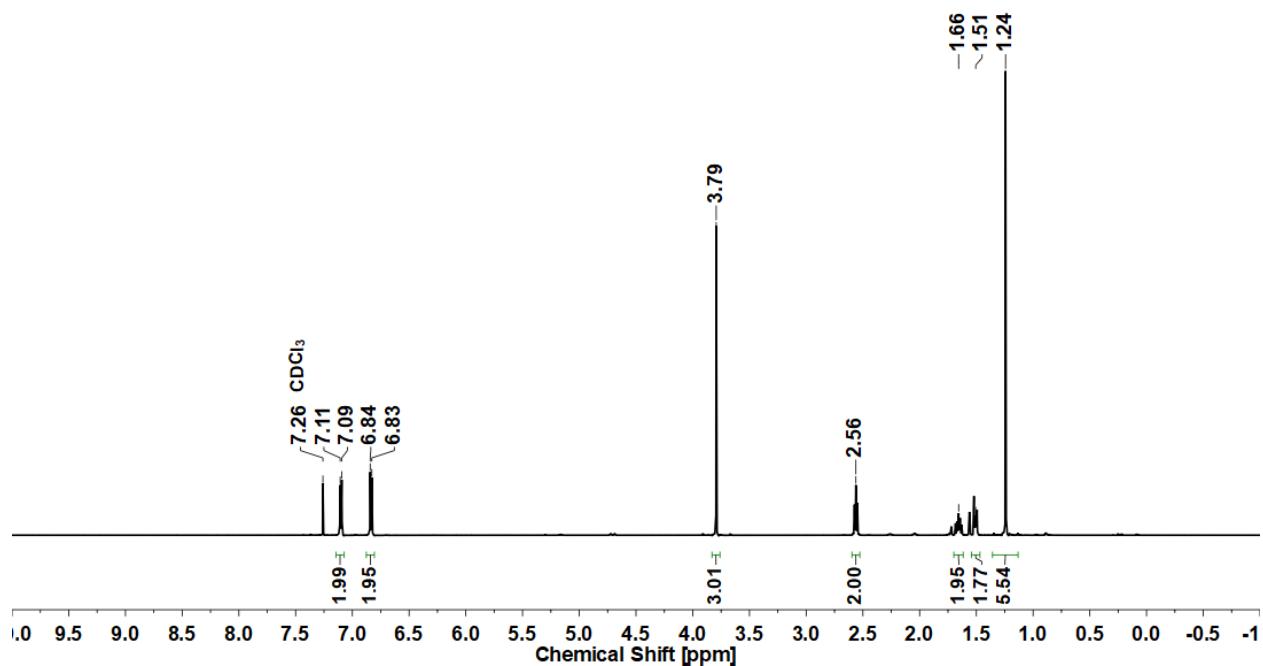

**Figure S-32.** <sup>1</sup>H NMR spectrum of 1-(4-azido-4-methylpentyl)-4-methoxybenzene in chloroform-*d*.

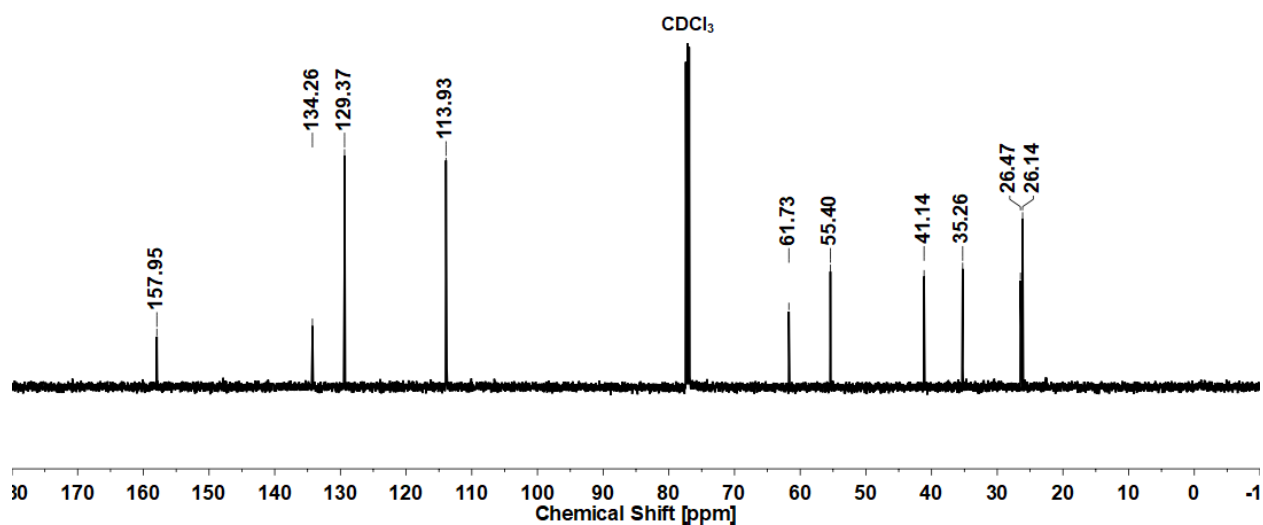

**Figure S-33.** <sup>13</sup>C{<sup>1</sup>H} NMR spectrum of 1-(4-azido-4-methylpentyl)-4-methoxybenzene in chloroform-*d*.

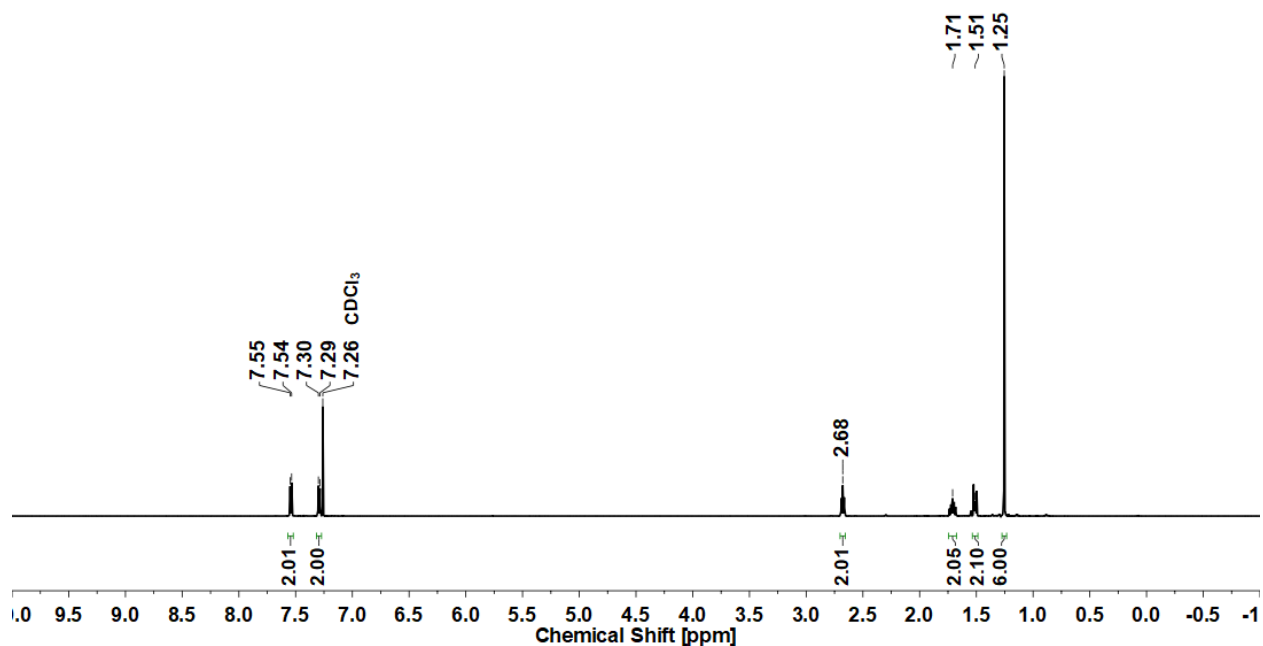

**Figure S-34.** <sup>1</sup>H NMR spectrum of 1-(4-azido-4-methylpentyl)-4-(trifluoromethyl)benzene in chloroform-*d*.

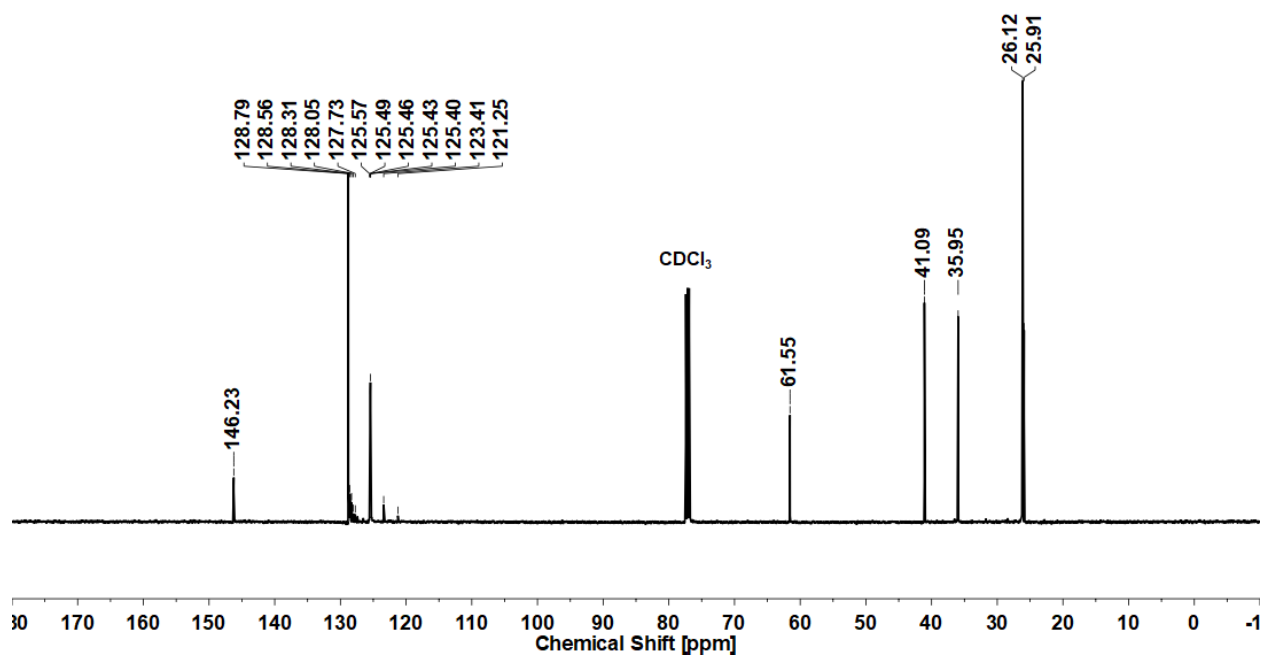

**Figure S-35.** <sup>13</sup>C{<sup>1</sup>H} NMR spectrum of 1-(4-azido-4-methylpentyl)-4-(trifluoromethyl)benzene in chloroform-*d*.

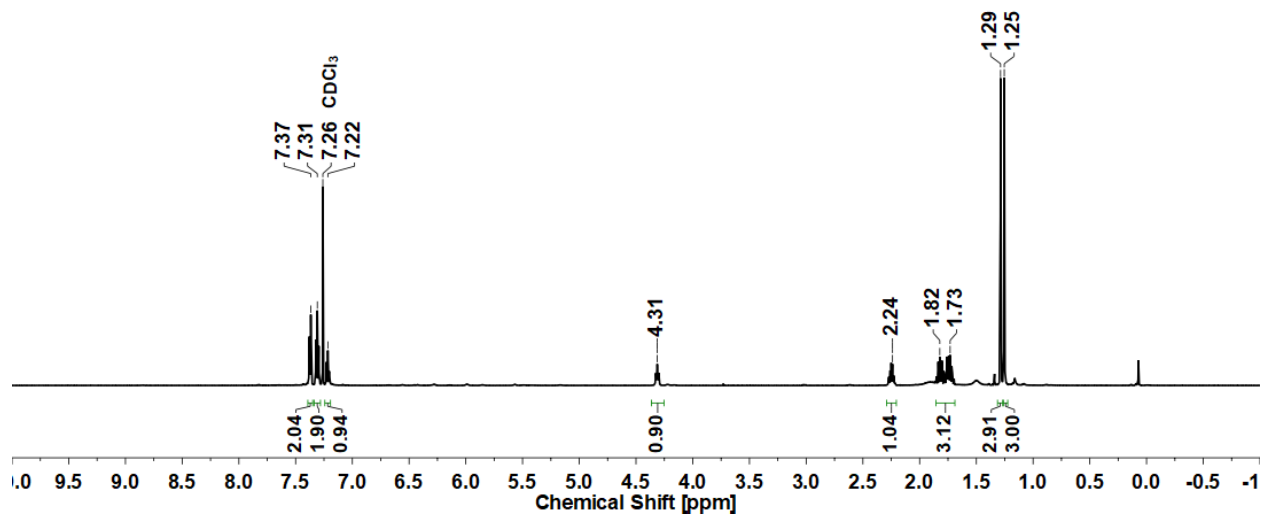

**Figure S-36.** <sup>1</sup>H NMR spectrum of 2,2-dimethyl-5-phenylpyrrolidine in chloroform-*d*.

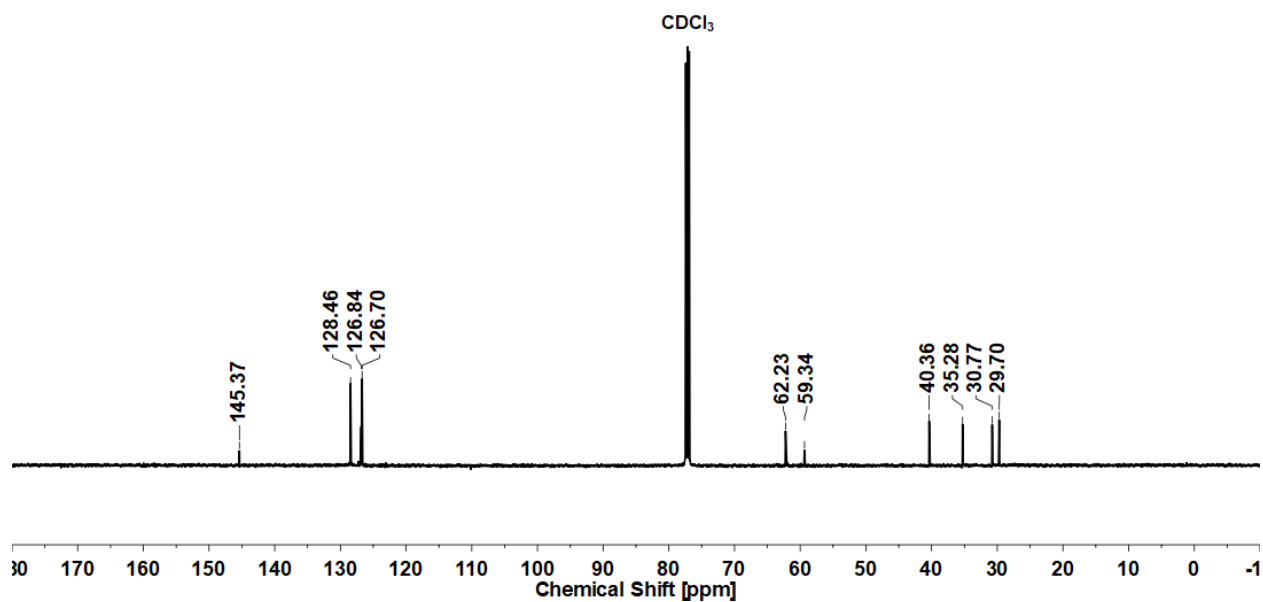

**Figure S-37.** <sup>13</sup>C{<sup>1</sup>H} NMR spectrum of 2,2-dimethyl-5-phenylpyrrolidine in chloroform-*d*.

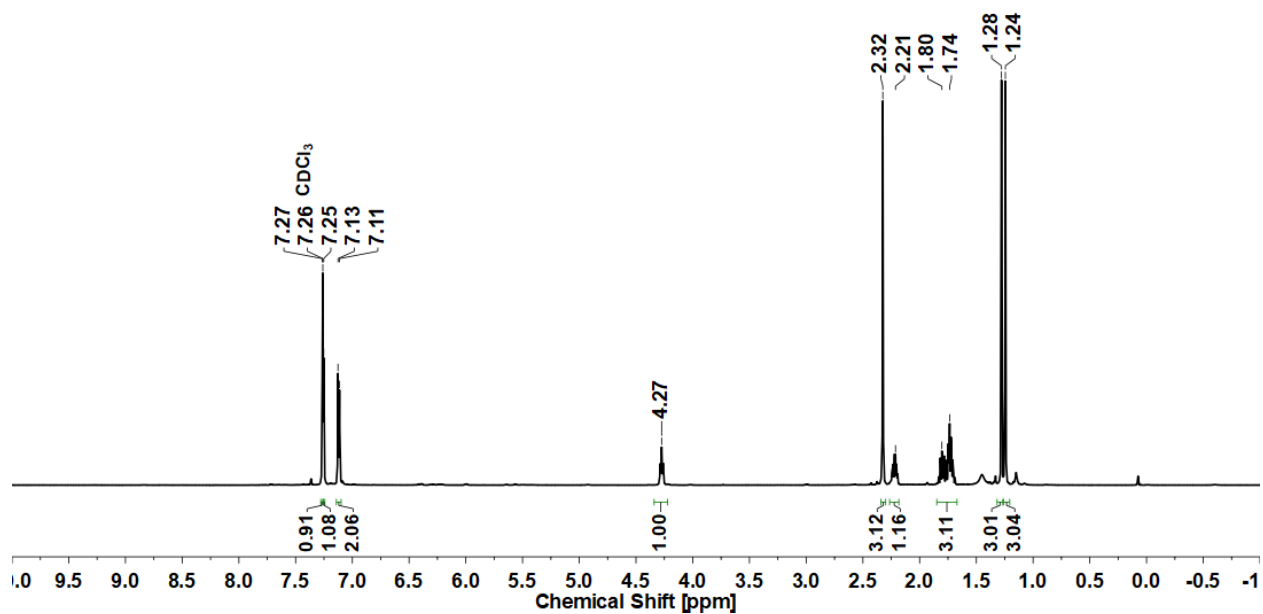

**Figure S-38.** <sup>1</sup>H NMR spectrum of 2,2-dimethyl-5-(*p*-tolyl)pyrrolidine in chloroform-*d*.

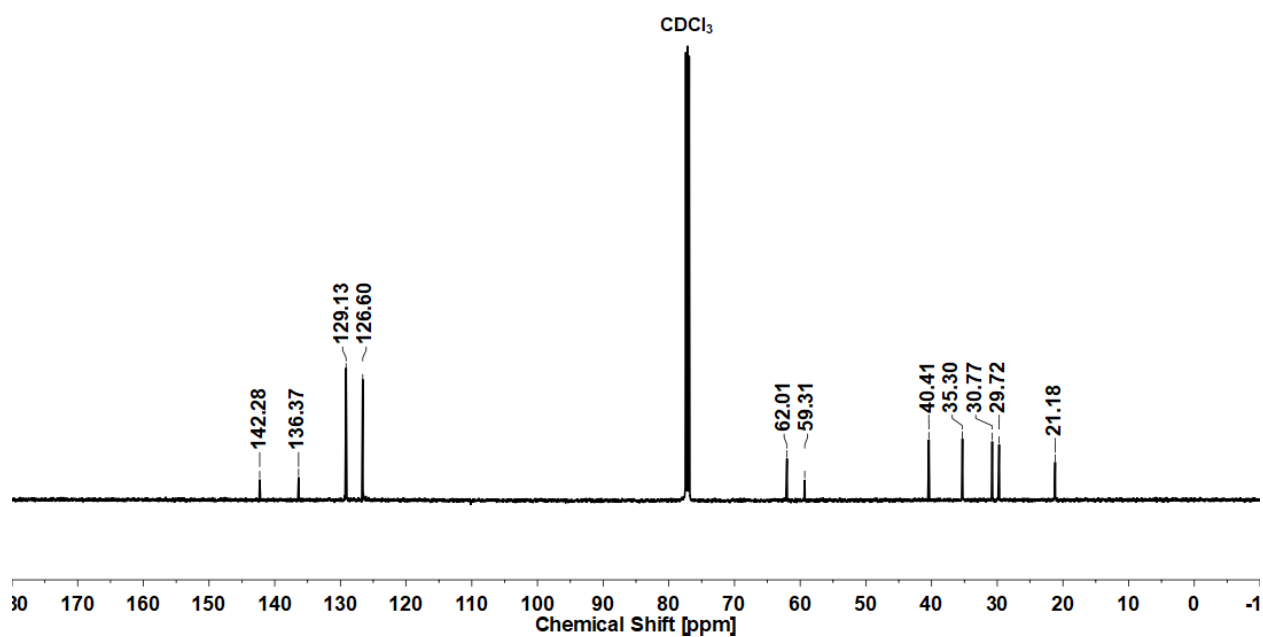

**Figure S-39.** <sup>13</sup>C{<sup>1</sup>H} NMR spectrum of 2,2-dimethyl-5-(*p*-tolyl)pyrrolidine in chloroform-*d*.

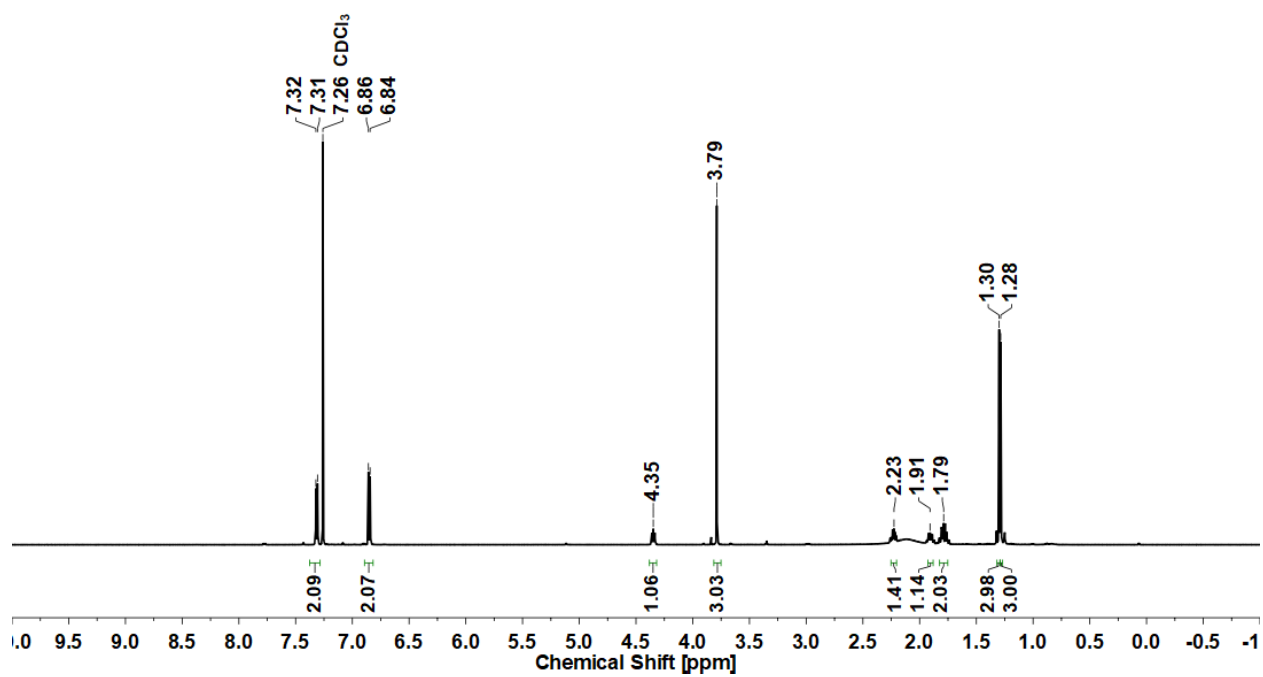

**Figure S-40.** <sup>1</sup>H NMR spectrum of 5-(4-methoxyphenyl)-2,2-dimethylpyrrolidine in chloroform-*d*.

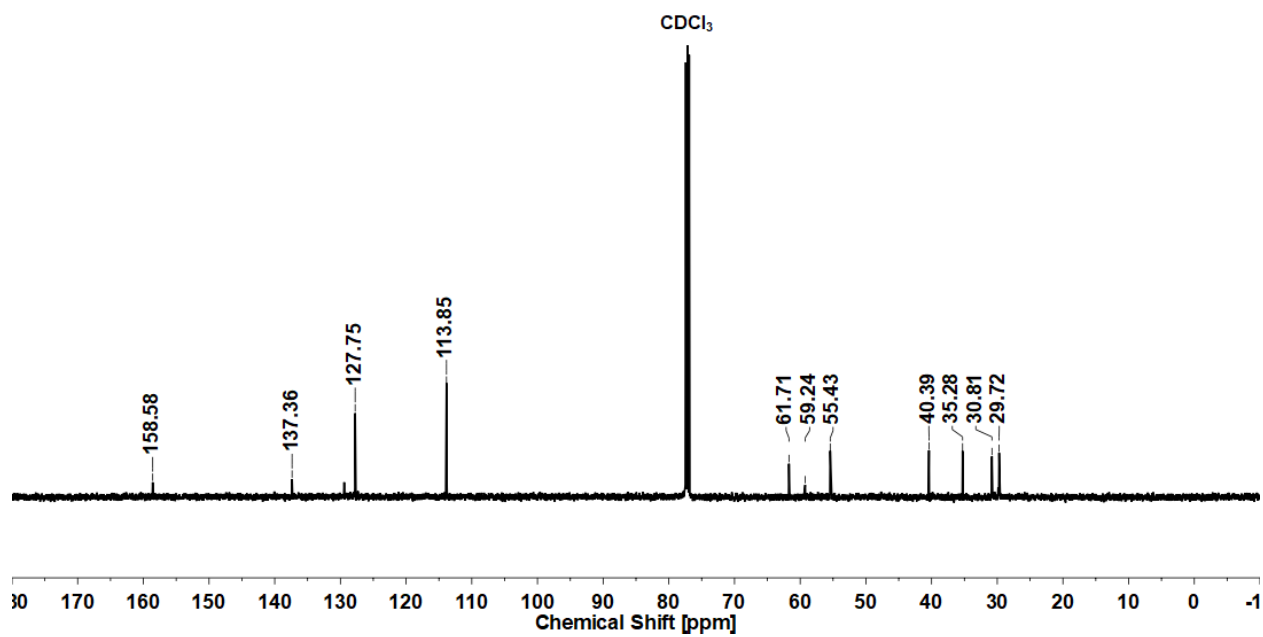

**Figure S-41** <sup>13</sup>C{<sup>1</sup>H} NMR spectrum of 5-(4-methoxyphenyl)-2,2-dimethylpyrrolidine in chloroform-*d*.

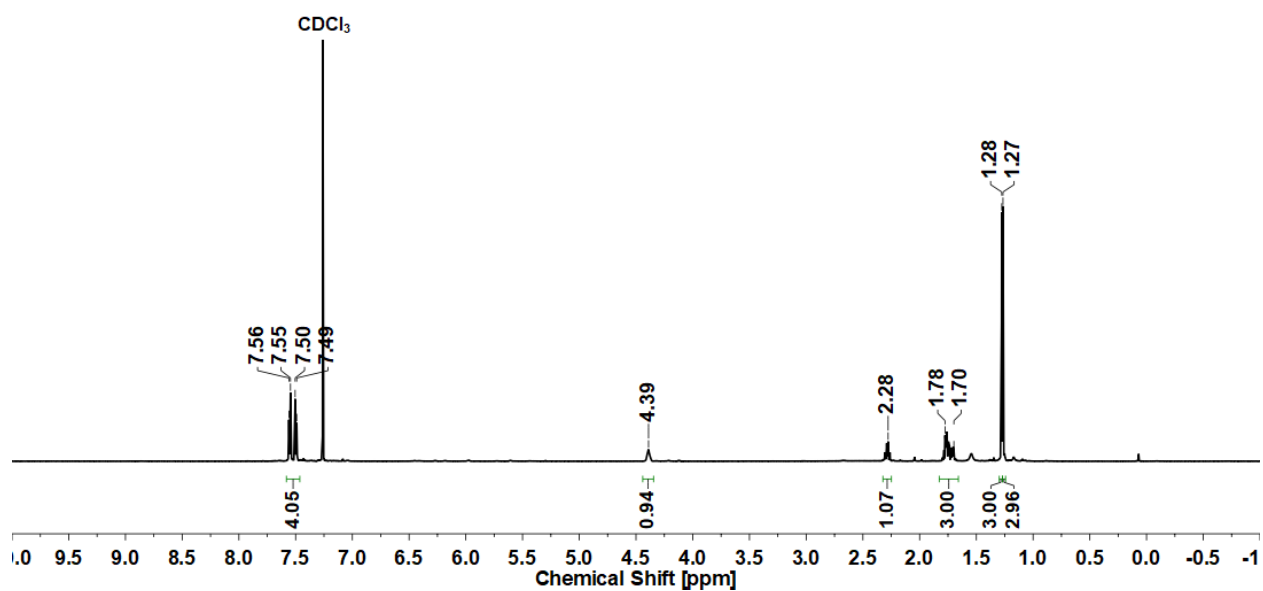

**Figure S-42.** <sup>1</sup>H NMR spectrum of 2,2-dimethyl-5-(4-(trifluoromethyl)phenyl)pyrrolidine in chloroform-*d*.

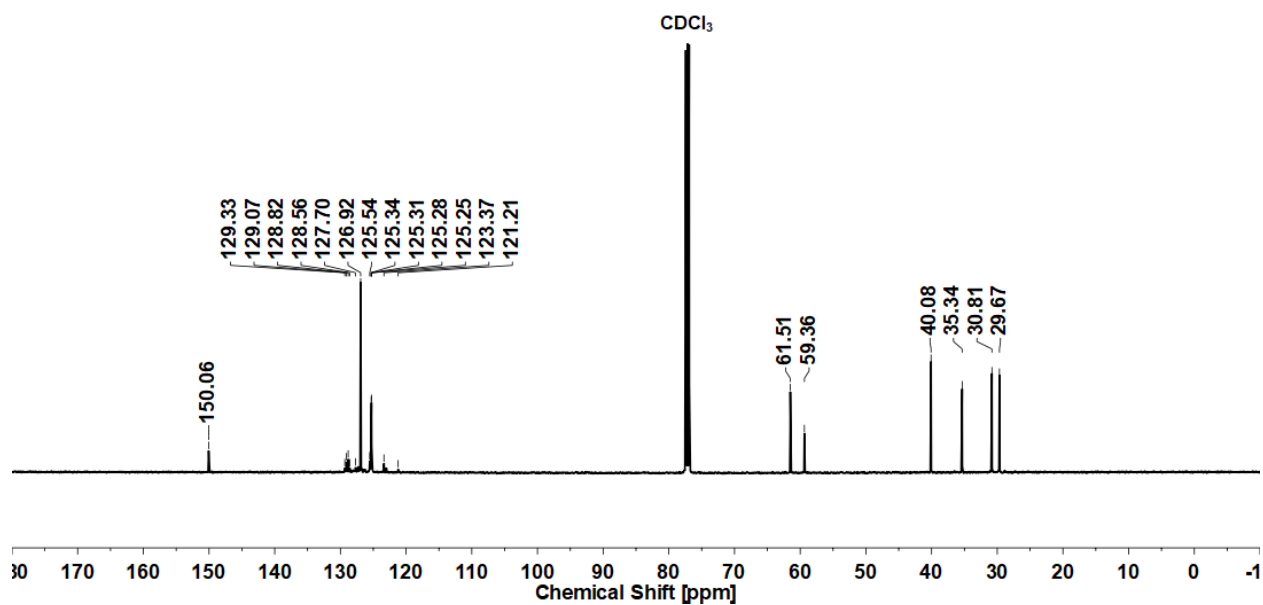

**Figure S-43.** <sup>13</sup>C{<sup>1</sup>H} NMR spectrum of 2,2-dimethyl-5-(4-(trifluoromethyl)phenyl)pyrrolidine in chloroform-*d*.

## X-Ray Diffraction Techniques.

All structures were collected on a Bruker three-circle platform goniometer equipped with an Apex II CCD and an Oxford cryostream cooling device. Radiation was from a graphite fine focus sealed tube Mo K $\alpha$  (0.71073 Å) source. Crystals were mounted on a cryoloop or glass fiber pin using Paratone N oil. Structures were collected at 100 K. Data was collected as a series of  $\phi$  and/or  $\omega$  scans. Data was integrated using SAINT<sup>21</sup> and scaled with either a numerical or multi-scan absorption correction using SADABS<sup>19</sup>. The structures were solved by direct methods or Patterson maps using SHELXS-97<sup>22</sup> and refined against  $F^2$  on all data by full matrix least squares with SHELXL-97<sup>20</sup>. All non-hydrogen atoms were refined anisotropically. Hydrogen atoms were placed at idealized positions and refined using a riding model. The isotropic displacement parameters of all hydrogen atoms were fixed to 1.2 times the atoms they are linked to (1.5 times for methyl groups). Further details on particular structures are noted below.

**(<sup>Ar</sup>L)CoBr (1).** The structure was solved in the monoclinic space group  $C2/c$  with 8 molecules per unit cell. Benzene solvent molecules exhibited positional disorder and were modeled using similarity constraints.

**(<sup>Ar</sup>L)Co (2).** The structure was solved in the triclinic space group  $P\bar{1}$  with 2 molecules per unit cell. One of the phenyl rings in the molecule exhibited positional disorder and was refined using similarity constraints. One of the benzene solvent molecules exhibited positional disorder and was refined using similarity constraints.

**(<sup>Ar</sup>L)Co(NR'), R' = C(CH<sub>3</sub>)<sub>2</sub>(CH<sub>2</sub>)<sub>3</sub>CH<sub>3</sub> (3).** The structure was solved in the triclinic space group  $P\bar{1}$  with 2 molecules per unit cell. One of alkyl groups in the molecule exhibited positional disorder and was refined using similarity constraints. Benzene solvent molecules exhibited positional disorder and were modeled using similarity constraints.

---

<sup>21</sup> APEX2 Software Suite; Bruker AXS: Madison, WI, 2014.

<sup>22</sup> Sheldrick, G. M. *Acta Crystallogr., Sect. A: Found. Crystallogr.* **2008**, 64, 112-122

**(<sup>Ar</sup>L)Co(NR'), R' = C(CH<sub>3</sub>)<sub>2</sub>(CH<sub>2</sub>)<sub>2</sub>CH(CH<sub>3</sub>)<sub>2</sub> (4).** The structure was solved in the triclinic space group  $P\bar{1}$  with 2 molecules per unit cell.

**(<sup>Ar</sup>L)Co(NAd) (10).** The structure was solved in the triclinic space group  $P\bar{1}$  with 2 molecules per unit cell. One of the adamantyl substituents exhibited positional disorder and was refined using similarity constraints. One of the phenyl rings in the molecule exhibited positional disorder and was refined using similarity constraints.

**(<sup>Ar</sup>L)Co( $\kappa^2$ -N<sub>4</sub>R'<sub>2</sub>), R' = C(CH<sub>3</sub>)<sub>2</sub>(CH<sub>2</sub>)<sub>3</sub>CH<sub>3</sub> (5).** The structure was solved in the monoclinic space group  $P2_1/c$  with 4 molecules per unit cell.

**(<sup>Ar</sup>L)Co( $\kappa^2$ -N<sub>4</sub>R'<sub>2</sub>), R' = C(CH<sub>3</sub>)<sub>2</sub>(CH<sub>2</sub>)<sub>2</sub>CH(CH<sub>3</sub>)<sub>2</sub> (6).** The structure was solved in the monoclinic space group  $P2_1/c$  with 4 molecules per unit cell. One of alkyl groups in the molecule exhibited positional disorder and was refined using similarity constraints.

**(<sup>Ar</sup>L)Co( $\kappa^2$ -N<sub>4</sub>Ad<sub>2</sub>) (11).** The structure was solved in the monoclinic space group  $C2/c$  with 8 molecules per unit cell.



**Table S-9.** X-ray diffraction experimental details<sup>a,b</sup>

|                                         | ( <sup>Ar</sup> L)CoBr (1)                           | ( <sup>Ar</sup> L)Co (2)                           | ( <sup>Ar</sup> L)Co(NR')<br>R' = C(CH <sub>3</sub> ) <sub>2</sub> (CH <sub>2</sub> ) <sub>3</sub> CH <sub>3</sub><br>(3) | ( <sup>Ar</sup> L)Co(NR')<br>R' = C(CH <sub>3</sub> ) <sub>2</sub> (CH <sub>2</sub> ) <sub>2</sub> CH(CH <sub>3</sub> ) <sub>2</sub><br>(4) |
|-----------------------------------------|------------------------------------------------------|----------------------------------------------------|---------------------------------------------------------------------------------------------------------------------------|---------------------------------------------------------------------------------------------------------------------------------------------|
| <b>Moiety</b>                           | C <sub>66</sub> H <sub>49</sub> BrCoN <sub>2</sub> ; | C <sub>66</sub> H <sub>49</sub> CoN <sub>2</sub> ; | C <sub>73</sub> H <sub>64</sub> CoN <sub>3</sub> ;                                                                        | C <sub>74</sub> H <sub>66</sub> CoN <sub>3</sub>                                                                                            |
| <b>Formula</b>                          | 3×(C <sub>6</sub> H <sub>6</sub> )                   | 3×(C <sub>6</sub> H <sub>6</sub> )                 | 1×(C <sub>6</sub> H <sub>6</sub> )                                                                                        |                                                                                                                                             |
| <b>FW</b>                               | 1243.31                                              | 1163.40                                            | 1120.38                                                                                                                   | 1056.30                                                                                                                                     |
| <b>Crystal System</b>                   | monoclinic                                           | triclinic                                          | triclinic                                                                                                                 | triclinic                                                                                                                                   |
| <b>Space Group</b>                      | <i>C</i> 2/ <i>c</i> (8)                             | <i>P</i> $\bar{1}$ (2)                             | <i>P</i> $\bar{1}$ (2)                                                                                                    | <i>P</i> $\bar{1}$ (2)                                                                                                                      |
| <b>(Z)</b>                              |                                                      |                                                    |                                                                                                                           |                                                                                                                                             |
| <b>a (Å)</b>                            | 15.9671(16)                                          | 12.594(9)                                          | 11.9404(10)                                                                                                               | 12.0205(16)                                                                                                                                 |
| <b>b (Å)</b>                            | 22.041(2)                                            | 14.092(10)                                         | 16.2194(13)                                                                                                               | 16.024(2)                                                                                                                                   |
| <b>c (Å)</b>                            | 18.9148(18)                                          | 20.413(16)                                         | 16.2288(14)                                                                                                               | 16.411(2)                                                                                                                                   |
| <b>α (°)</b>                            | 90                                                   | 75.348(11)                                         | 87.845(2)                                                                                                                 | 87.612(3)                                                                                                                                   |
| <b>β (°)</b>                            | 106.561(2)                                           | 84.047(10)                                         | 87.553(2)                                                                                                                 | 72.643(3)                                                                                                                                   |
| <b>γ (°)</b>                            | 90                                                   | 64.970(12)                                         | 72.424(2)                                                                                                                 | 88.139(3)                                                                                                                                   |
| <b>Volume (Å<sup>3</sup>)</b>           | 6380.6(11)                                           | 3176(4)                                            | 2992.5(4)                                                                                                                 | 3013.8(7)                                                                                                                                   |
| <b>Calc. ρ (mg/m<sup>3</sup>)</b>       | 1.294                                                | 1.217                                              | 1.243                                                                                                                     | 1.166                                                                                                                                       |
| <b>μ (mm<sup>-1</sup>)</b>              | 0.94                                                 | 0.32                                               | 0.34                                                                                                                      | 0.33                                                                                                                                        |
| <b>Crystal Size (mm)</b>                | 0.20×0.15×0.09                                       | 0.18×0.16×0.15                                     | 0.15×0.10×0.07                                                                                                            | 0.25×0.12×0.07                                                                                                                              |
| <b>Reflections</b>                      | 5707                                                 | 11197                                              | 10583                                                                                                                     | 10696                                                                                                                                       |
| <b>Completeness</b>                     | 98.7%                                                | 99.6%                                              | 99.5%                                                                                                                     | 99.6%                                                                                                                                       |
| <b>GOF on F<sup>2</sup></b>             | 1.11                                                 | 1.04                                               | 1.02                                                                                                                      | 0.96                                                                                                                                        |
| <b>R1, wR2<sup>c</sup> [I&gt;2σ(I)]</b> | 0.089, 0.219                                         | 0.085, 0.273                                       | 0.073, 0.163                                                                                                              | 0.090, 0.235                                                                                                                                |

|                                                           | <sup>(ArL)</sup> Co(NAd)<br>(10)                                                                         | <sup>(ArL)</sup> Co( $\kappa^2$ -N <sub>4</sub> R' <sub>2</sub> )<br>R' = C(CH <sub>3</sub> ) <sub>2</sub> (CH <sub>2</sub> ) <sub>3</sub> CH <sub>3</sub><br>(5) | <sup>(ArL)</sup> Co( $\kappa^2$ -N <sub>4</sub> R' <sub>2</sub> )<br>R' = C(CH <sub>3</sub> ) <sub>2</sub> (CH <sub>2</sub> ) <sub>2</sub> CH(CH <sub>3</sub> ) <sub>2</sub><br>(6) | <sup>(ArL)</sup> Co( $\kappa^2$ -N <sub>4</sub> Ad <sub>2</sub> )<br>(11) |
|-----------------------------------------------------------|----------------------------------------------------------------------------------------------------------|-------------------------------------------------------------------------------------------------------------------------------------------------------------------|-------------------------------------------------------------------------------------------------------------------------------------------------------------------------------------|---------------------------------------------------------------------------|
| <b>Moiety Formula</b>                                     | C <sub>76</sub> H <sub>64</sub> CoN <sub>3</sub> ;<br>1×(C <sub>6</sub> H <sub>5</sub> CH <sub>3</sub> ) | C <sub>80</sub> H <sub>79</sub> CoN <sub>6</sub>                                                                                                                  | C <sub>82</sub> H <sub>83</sub> CoN <sub>6</sub><br>1×(C <sub>6</sub> H <sub>14</sub> )                                                                                             | C <sub>86</sub> H <sub>79</sub> CoN <sub>6</sub>                          |
| <b>FW</b>                                                 | 1170.44                                                                                                  | 1183.49                                                                                                                                                           | 1297.72                                                                                                                                                                             | 1255.55                                                                   |
| <b>Crystal System</b>                                     | triclinic                                                                                                | monoclinic                                                                                                                                                        | monoclinic                                                                                                                                                                          | monoclinic                                                                |
| <b>Space Group</b>                                        | <i>P</i> $\bar{1}$ (2)                                                                                   | <i>P</i> 2 <sub>1</sub> / <i>c</i> (4)                                                                                                                            | <i>P</i> 2 <sub>1</sub> / <i>c</i> (4)                                                                                                                                              | <i>C</i> 2/ <i>c</i> (8)                                                  |
| <b>(Z)</b>                                                |                                                                                                          |                                                                                                                                                                   |                                                                                                                                                                                     |                                                                           |
| <b>a (Å)</b>                                              | 16.068(1)                                                                                                | 12.7287(7)                                                                                                                                                        | 13.4875(7)                                                                                                                                                                          | 47.858(10)                                                                |
| <b>b (Å)</b>                                              | 16.5966(10)                                                                                              | 16.2170(9)                                                                                                                                                        | 16.1414(8)                                                                                                                                                                          | 18.405(4)                                                                 |
| <b>c (Å)</b>                                              | 24.9849(15)                                                                                              | 33.8667(19)                                                                                                                                                       | 33.4198(17)                                                                                                                                                                         | 18.553 (4)                                                                |
| <b><math>\alpha</math> (°)</b>                            | 74.791(2)                                                                                                | 90                                                                                                                                                                | 90                                                                                                                                                                                  | 90                                                                        |
| <b><math>\beta</math> (°)</b>                             | 73.522(2)                                                                                                | 95.843(2)                                                                                                                                                         | 98.765(2)                                                                                                                                                                           | 103.82(3)                                                                 |
| <b><math>\gamma</math> (°)</b>                            | 85.350(2)                                                                                                | 90                                                                                                                                                                | 90                                                                                                                                                                                  | 90                                                                        |
| <b>Volume (Å<sup>3</sup>)</b>                             | 6165.2(7)                                                                                                | 6954.5(7)                                                                                                                                                         | 7190.8(6)                                                                                                                                                                           | 15869(6)                                                                  |
| <b>Calc. <math>\rho</math> (mg/m<sup>3</sup>)</b>         | 1.261                                                                                                    | 1.130                                                                                                                                                             | 1.199                                                                                                                                                                               | 1.051                                                                     |
| <b><math>\mu</math> (mm<sup>-1</sup>)</b>                 | 0.33                                                                                                     | 0.29                                                                                                                                                              | 0.29                                                                                                                                                                                | 0.26                                                                      |
| <b>Crystal Size (mm)</b>                                  | 0.15×0.06×0.04                                                                                           | 0.40×0.20×0.07                                                                                                                                                    | 0.40×0.19×0.06                                                                                                                                                                      | 0.25×0.10×0.09                                                            |
| <b>Reflections</b>                                        | 21790                                                                                                    | 12335                                                                                                                                                             | 12739                                                                                                                                                                               | 14112                                                                     |
| <b>Completeness</b>                                       | 99.5%                                                                                                    | 99.5%                                                                                                                                                             | 99.7%                                                                                                                                                                               | 99.7%                                                                     |
| <b>GOF on F<sup>2</sup></b>                               | 1.01                                                                                                     | 1.06                                                                                                                                                              | 1.07                                                                                                                                                                                | 1.05                                                                      |
| <b>R1, wR2<sup>c</sup> [I&gt;2<math>\sigma</math>(I)]</b> | 0.111, 0.227                                                                                             | 0.049, 0.117                                                                                                                                                      | 0.073, 0.168                                                                                                                                                                        | 0.044, 0.105                                                              |

<sup>a</sup>  $\lambda$  = 0.71073 Å; <sup>b</sup> T = 100(2) K; <sup>c</sup> R1 =  $\Sigma||F_o| - |F_c|| / \Sigma|F_o|$ , wR2 =  $\{\Sigma[w(F_o^2 - F_c^2)^2] / \Sigma[w(F_o^2)^2]\}^{1/2}$

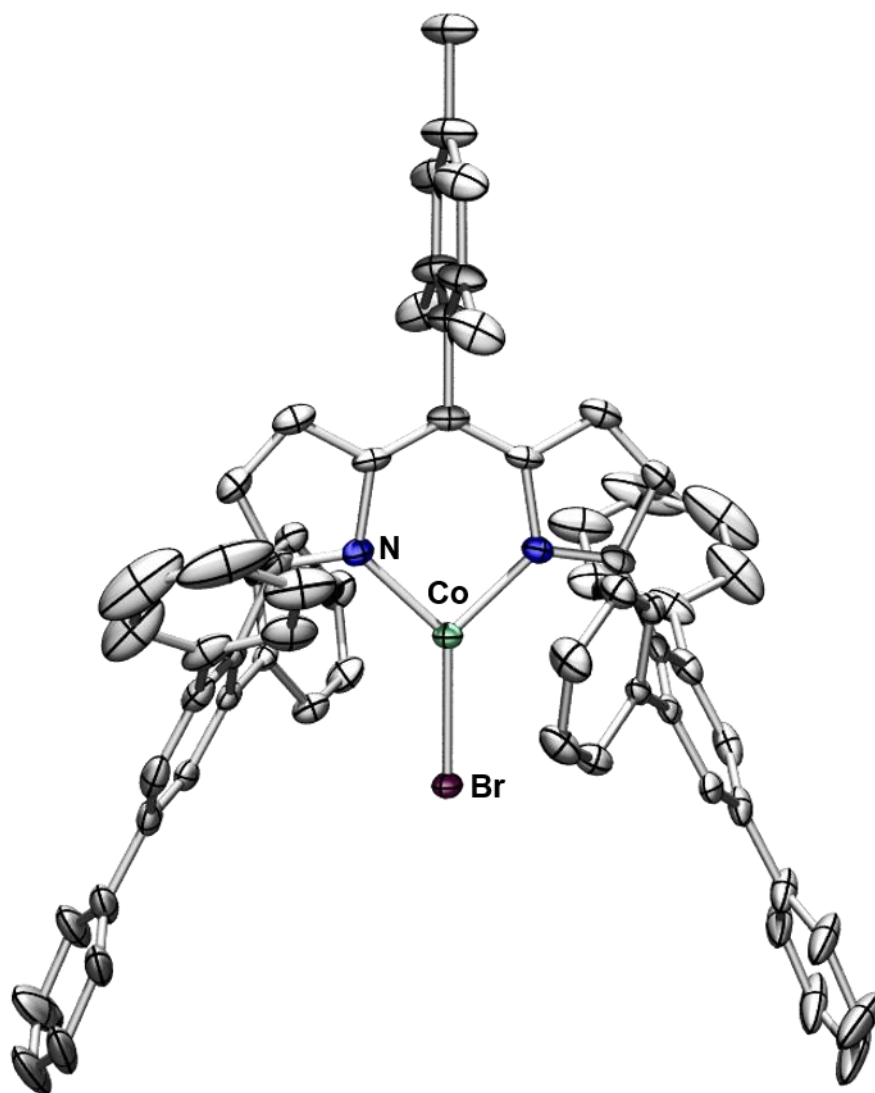

**Figure S-44.** Solid-state molecular structure for ( $^{\text{Ar}}\text{L}$ )CoBr (**1**) with thermal ellipsoids at 50% probability level. Hydrogens omitted for clarity.

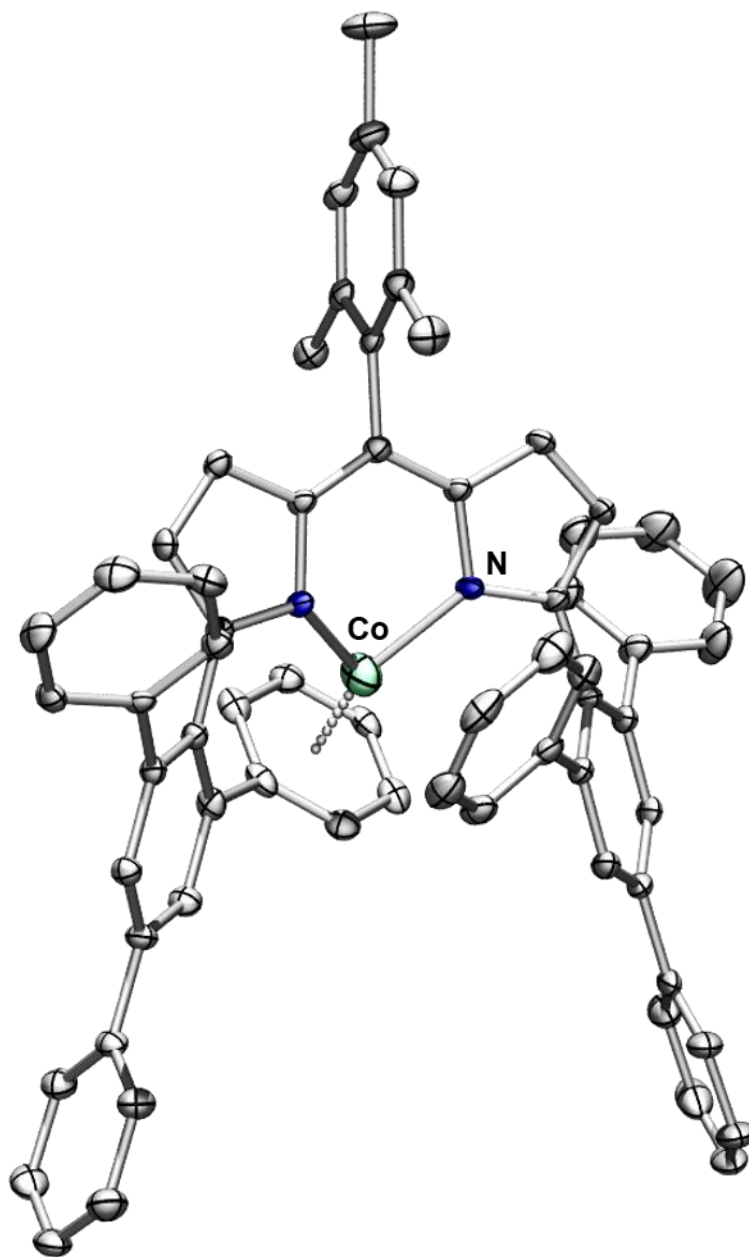

**Figure S-45.** Solid-state molecular structure for (<sup>Ar</sup>L)Co (**2**) with thermal ellipsoids at 50% probability level. Hydrogens omitted for clarity.

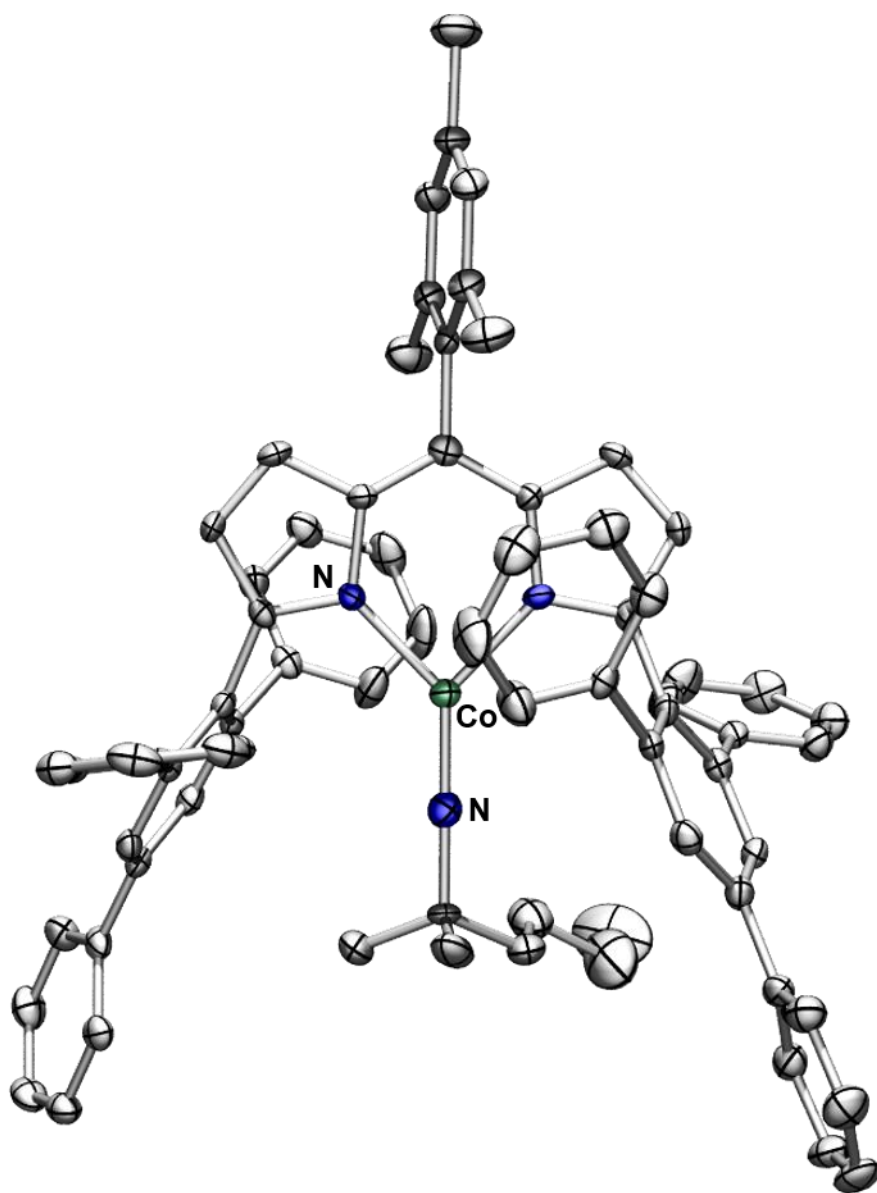

**Figure S-46.** Solid-state molecular structure for ( $A^L$ )Co(NR'),  $R' = C(CH_3)_2(CH_2)_3CH_3$  (**3**) with thermal ellipsoids at 50% probability level. Hydrogens omitted for clarity.

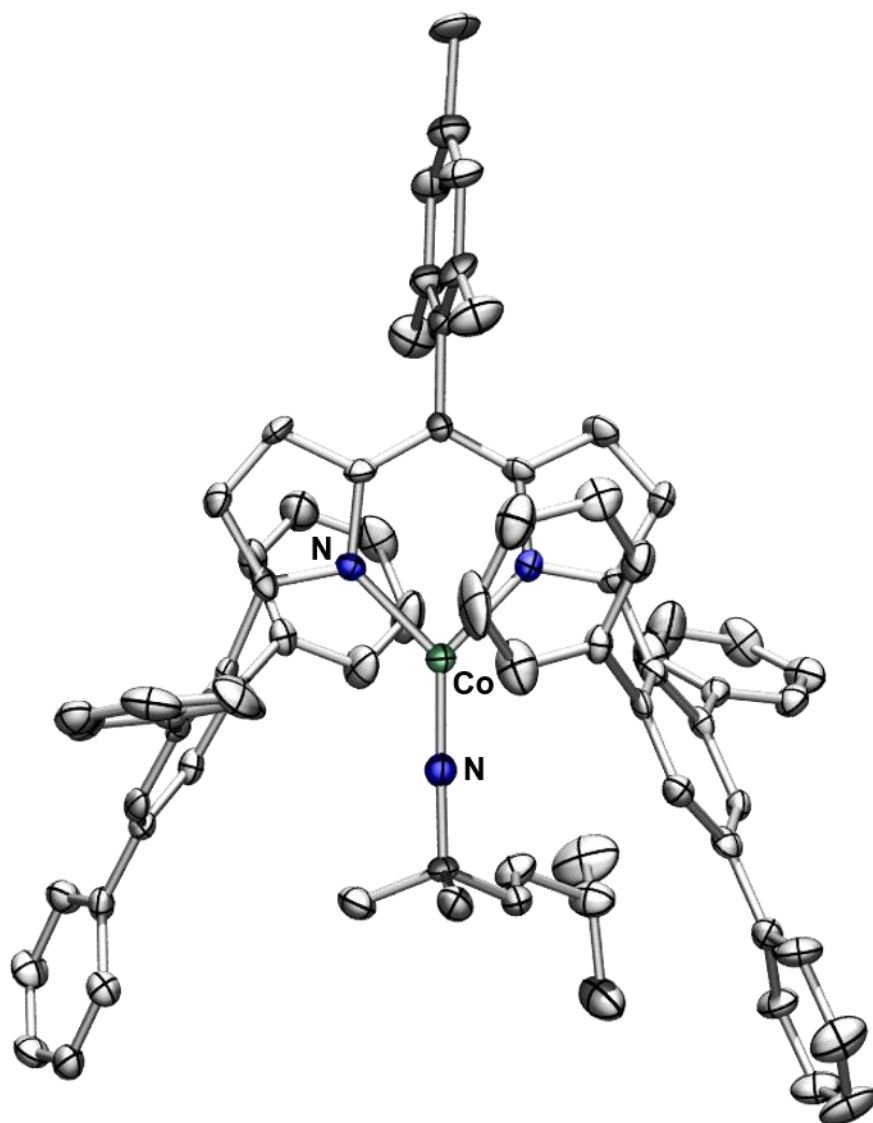

**Figure S-47.** Solid-state molecular structure for ( $^{\text{Ar}}\text{L}$ )Co(NR'), R' = C(CH<sub>3</sub>)<sub>2</sub>(CH<sub>2</sub>)<sub>2</sub>CH(CH<sub>3</sub>)<sub>2</sub> (**4**) with thermal ellipsoids at 50% probability level. Hydrogens omitted for clarity.

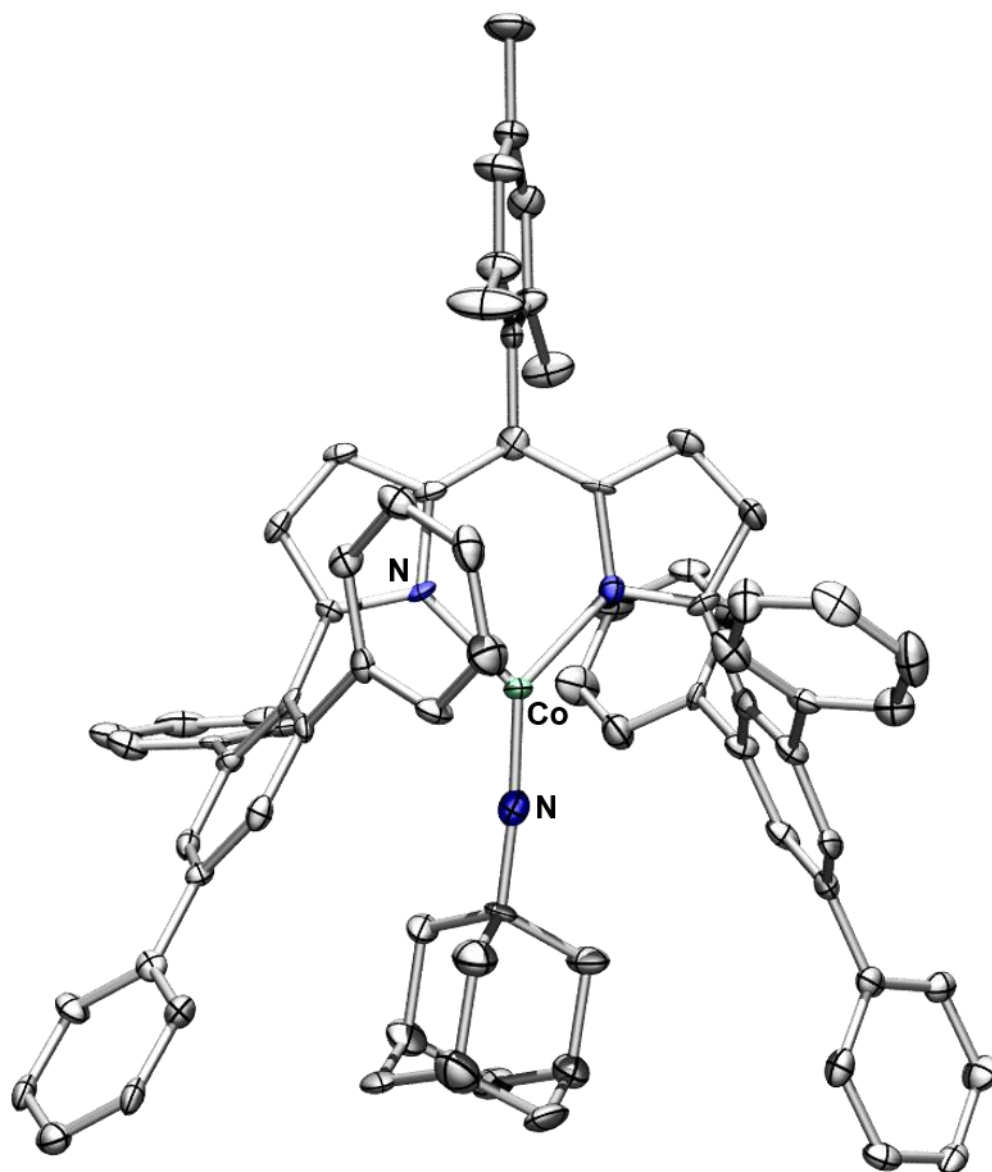

**Figure S-48.** Solid-state molecular structure for (<sup>Ar</sup>L)Co(NAd) (**10**) with thermal ellipsoids at 50% probability level. Hydrogens omitted for clarity.

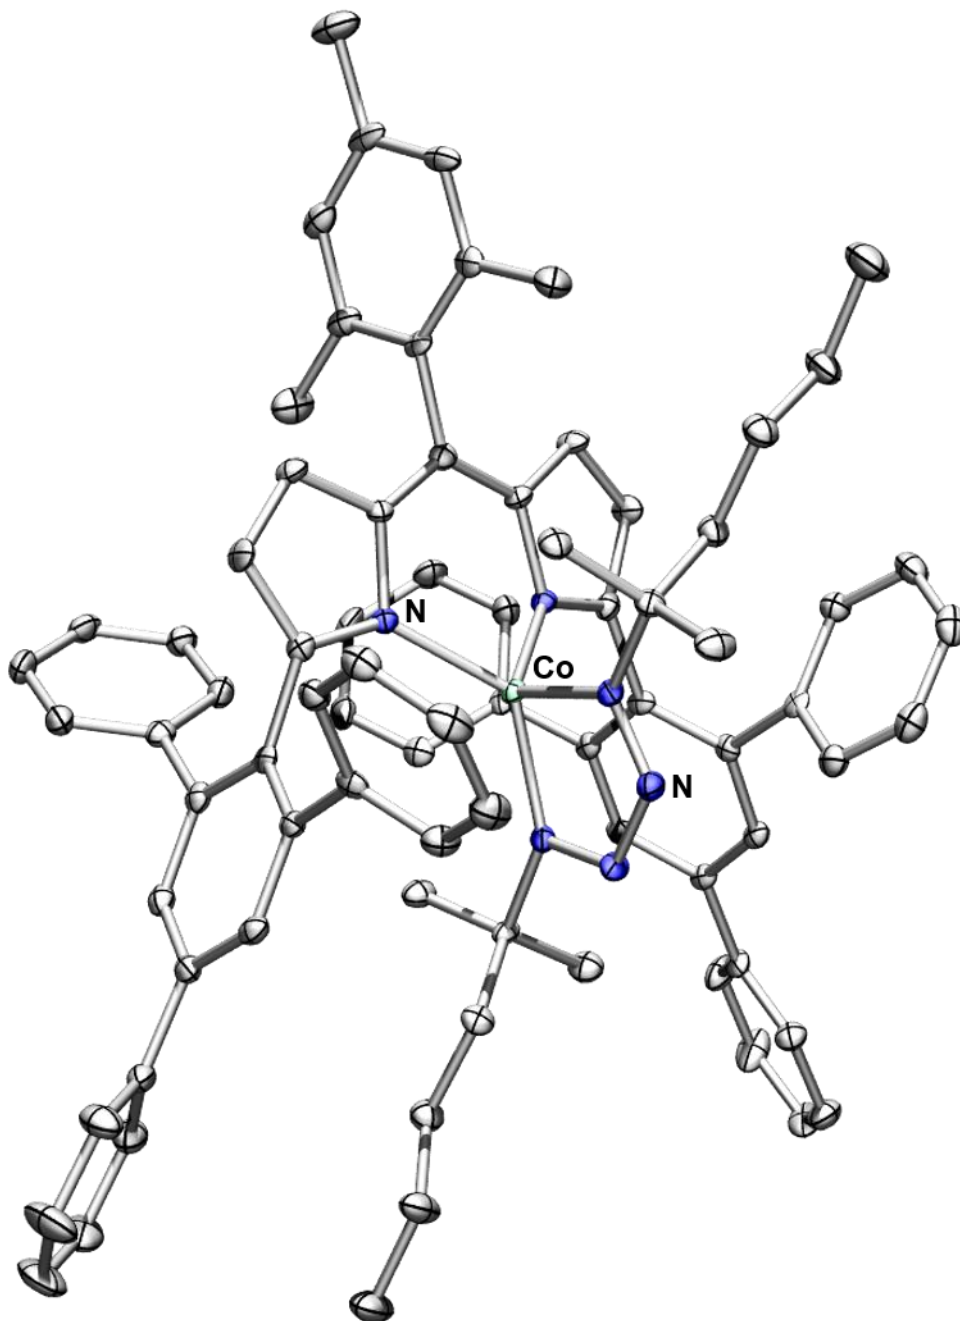

**Figure S-49** Solid-state molecular structure for  $(^{\text{Ar}}\text{L})\text{Co}(\kappa^2\text{-N}_4\text{R}'_2)$ ,  $\text{R}' = \text{C}(\text{CH}_3)_2(\text{CH}_2)_3\text{CH}_3$  (**5**) with thermal ellipsoids at 50% probability level. Hydrogens omitted for clarity.



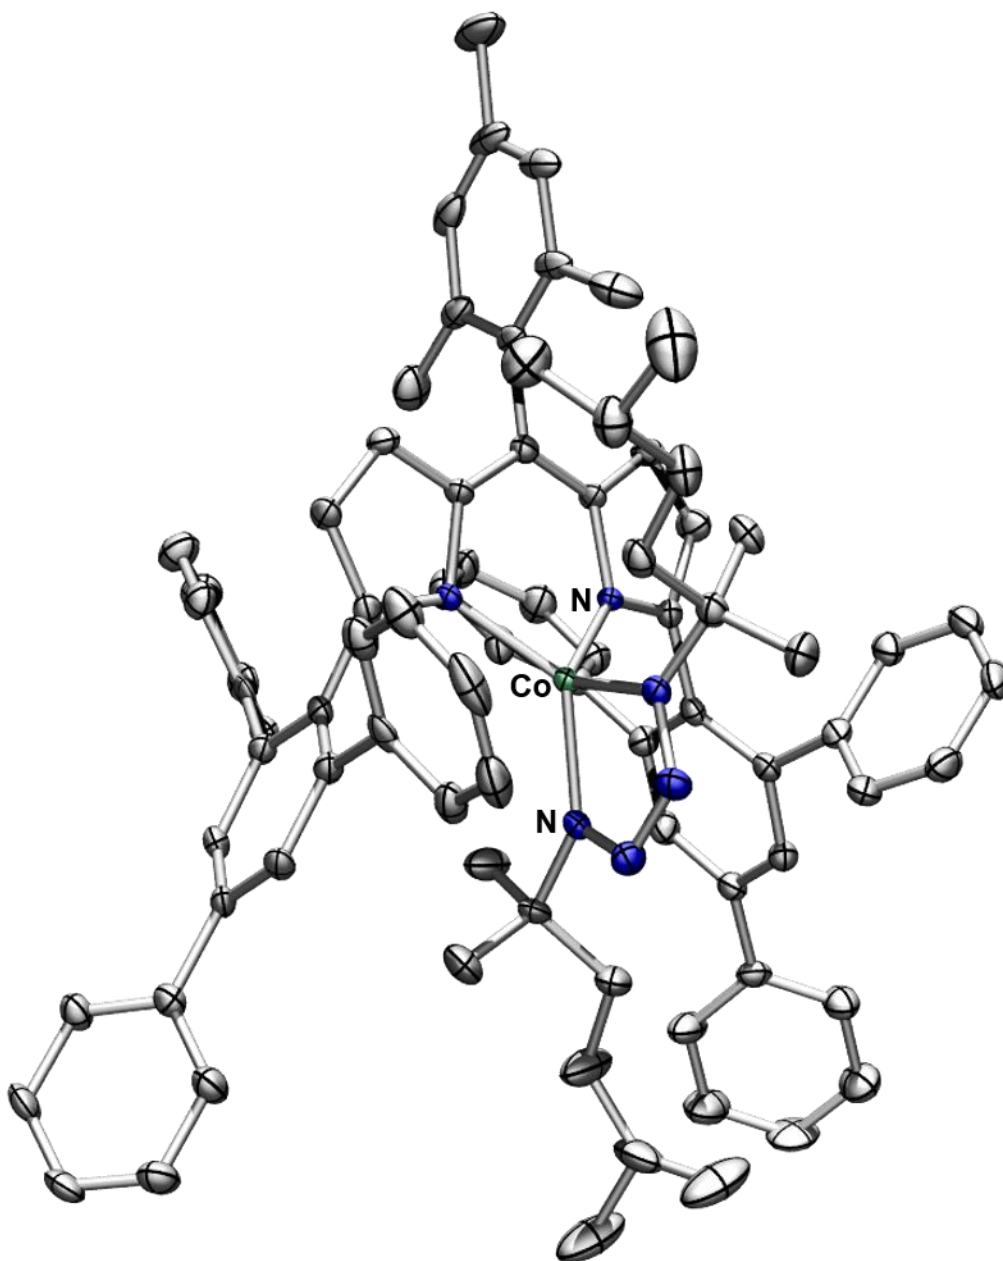

**Figure S-50.** Solid-state molecular structure for ( $^{\text{Ar}}\text{L}$ )Co( $\kappa^2\text{-N}_4\text{R}'_2$ ),  $\text{R}' = \text{C}(\text{CH}_3)_2(\text{CH}_2)_2\text{CH}(\text{CH}_3)_2$  (**6**) with thermal ellipsoids at 50% probability level. Hydrogens omitted for clarity.

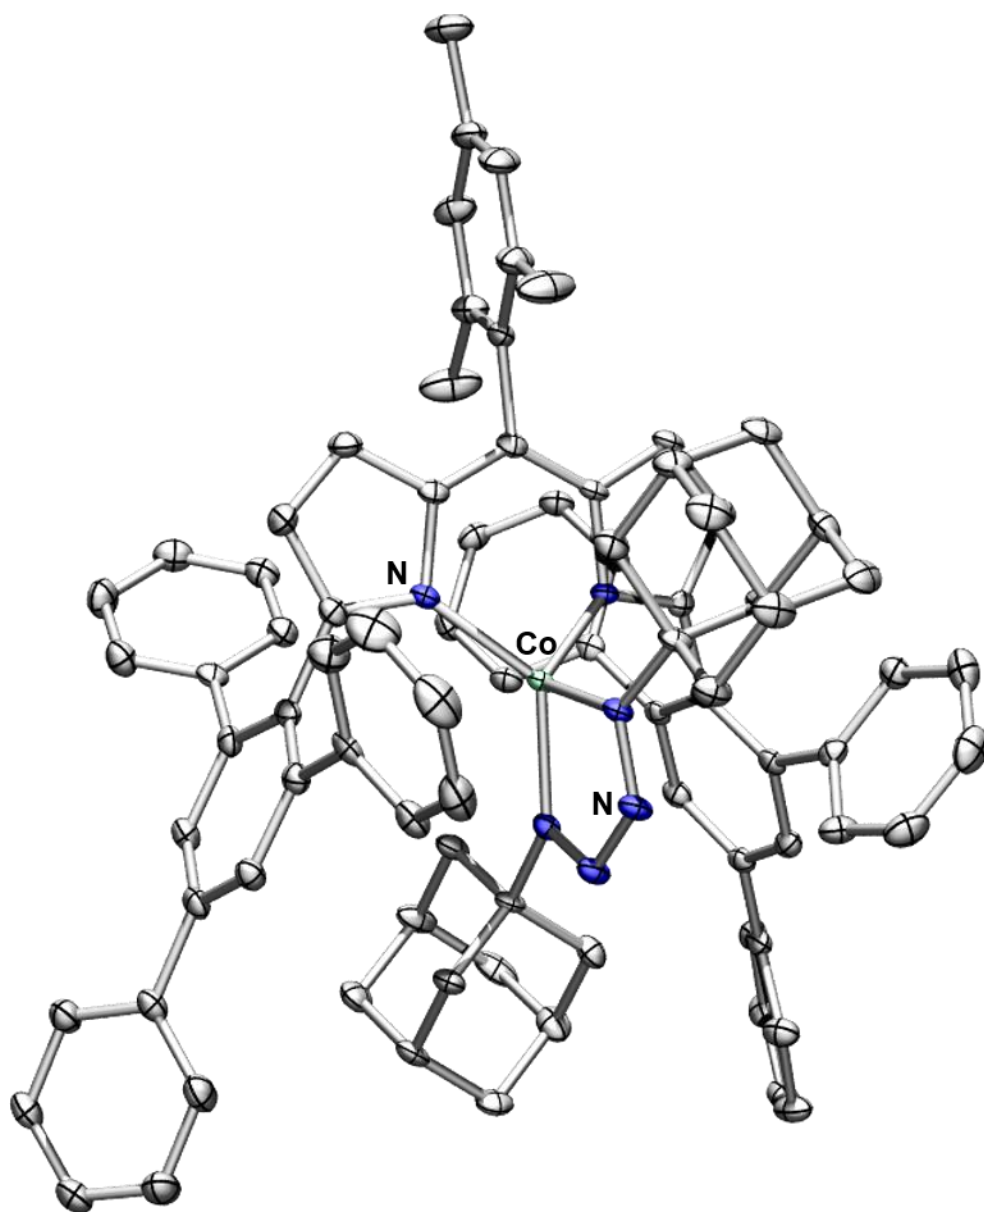

**Figure S-51.** Solid-state molecular structure for  $(^{\text{Ar}}\text{L})\text{Co}(\kappa^2\text{-N}_4\text{Ad}_2)$  (**11**) with thermal ellipsoids at 50% probability level. Hydrogens omitted for clarity.

### Computational Methods.

Computations were carried out utilizing the ORCA 4.0.1.2 program package.<sup>23</sup> All calculations employed the def2-TZVP<sup>24</sup> (Co, N) and def2-SV(P)<sup>25</sup> (C, H) basis sets. Further, the def2-TSVP/J (Co, N) and def2-SV(P)/J (C, H) auxiliary basis sets were employed to utilize the RIJCOSX<sup>26</sup> approximation for accelerating the calculation. The B3LYP<sup>27</sup> functional was chosen based on good agreement of the optimized structure of **10** with its crystallographic data.

**Table S-10.** Summary of the geometry optimized results of **10-py**.

|                              | <i>S</i> = <b>0</b> model | <i>S</i> = <b>1</b> model | <i>S</i> = <b>2</b> model |
|------------------------------|---------------------------|---------------------------|---------------------------|
| Co–N <sub>imido</sub> (Å)    | 1.70                      | 1.82                      | 1.79                      |
| Co–N <sub>dipyrin</sub> (Å)  | 2.04/2.05                 | 2.07/2.07                 | 2.07/2.11                 |
| Co–N <sub>pyridine</sub> (Å) | 2.07                      | 2.15                      | 2.18                      |
| Co–N <sub>imido</sub> –C (°) | 176.4                     | 143.7                     | 152.5                     |
| $\tau_4$ <sup>28</sup>       | 0.77                      | 0.75                      | 0.76                      |
| Relative energy (kcal/mol)   | +7.7                      | +1.6                      | 0                         |

<sup>23</sup> Neese, F. *The ORCA program system*, Wiley Interdiscip. Rev.: Comput. Mol. Sci., **2012**, 2, 73.

<sup>24</sup> Weigend, F.; Ahlrichs, R. *Phys. Chem. Chem. Phys.* **2005**, 7, 3297

<sup>25</sup> Weigend, F. *Phys. Chem. Chem. Phys.* **2006**, 8, 1057

<sup>26</sup> Neese, F.; Wennmohs, F.; Hansen, A.; Becker, U. *Chem. Phys.* **2009**, 356, 98

<sup>27</sup> (a) Becke, A. D. *J. Chem. Phys.* **1993**, 98, 5648 (b) Lee, C. T.; Yang, W. T.; Parr, R. G. *Phys Rev. B*, **1988**, 33, 785

<sup>28</sup> Yang L.; Powell D. R.; Houser R. P. *Dalton Trans.* **2007**, 955

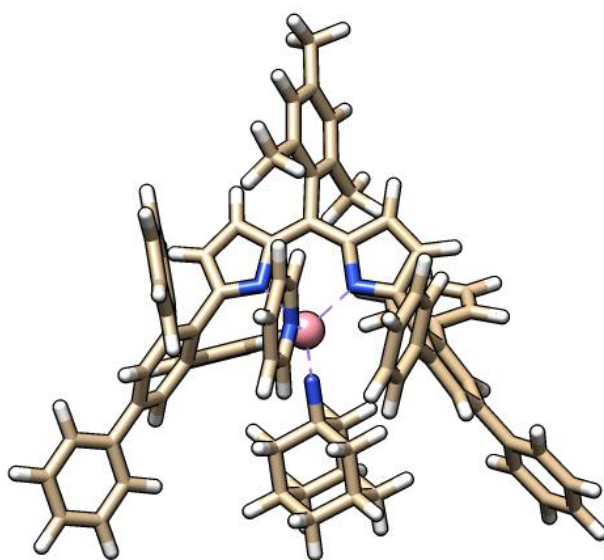

**Figure S-52.** Geometry optimized molecular structure of (<sup>Ar</sup>L)Co(py)(NAd) (**10-py**) with an  $S = 0$  spin state. Hydrogens omitted for clarity.

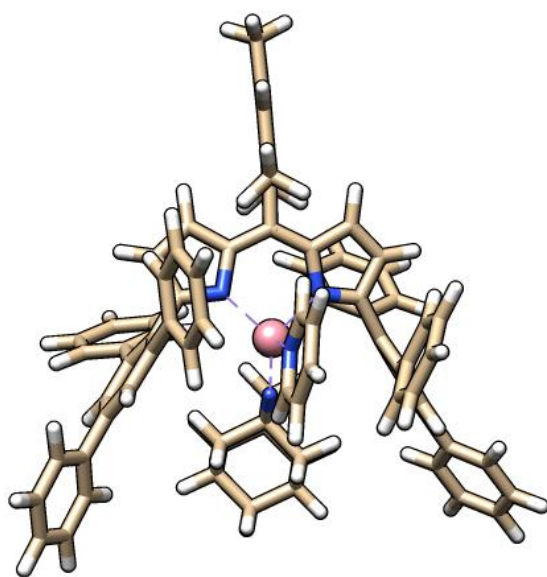

**Figure S-53.** Geometry optimized molecular structure of (<sup>Ar</sup>L)Co(py)(NAd) (**10-py**) with an  $S = 1$  spin state. Hydrogens omitted for clarity.

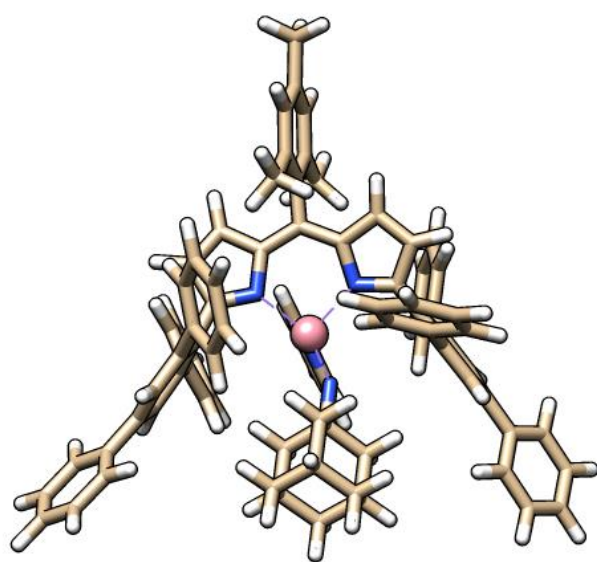

**Figure S-54.** Geometry optimized molecular structure of (<sup>Ar</sup>L)Co(py)(NAd) (**10-py**) with an  $S = 2$  spin state. Hydrogens omitted for clarity.



**Table S-11.** Coordinates of optimized molecular structure for (<sup>Ar</sup>L)Co(NAd) (**10**).Singlet ( $S = 0$ )

|    |           |           |           |
|----|-----------|-----------|-----------|
| Co | 11.689614 | 18.334845 | 6.020368  |
| N  | 9.752576  | 18.348816 | 5.628457  |
| N  | 11.929432 | 16.596658 | 5.110569  |
| C  | 9.011786  | 17.274051 | 5.123749  |
| C  | 9.706394  | 23.306561 | 7.438708  |
| C  | 9.212363  | 20.668615 | 6.456763  |
| C  | 10.077599 | 22.928650 | 6.139521  |
| C  | 8.867713  | 19.316525 | 5.941881  |
| N  | 12.593448 | 19.301748 | 7.079479  |
| C  | 9.853091  | 21.636077 | 5.636599  |
| C  | 13.108125 | 16.013733 | 4.814433  |
| C  | 16.873584 | 17.279613 | 6.531486  |
| C  | 15.946965 | 16.528232 | 7.271879  |
| C  | 9.435783  | 20.835263 | 3.256174  |
| C  | 14.408228 | 16.453682 | 5.386631  |
| C  | 13.791263 | 15.308643 | 7.577601  |
| C  | 7.534616  | 18.890377 | 5.673169  |
| C  | 10.292661 | 21.379799 | 4.230244  |
| C  | 9.062475  | 22.342656 | 8.226054  |
| C  | 9.560029  | 16.091596 | 4.591861  |
| C  | 14.727424 | 16.108168 | 6.724706  |
| C  | 8.607018  | 15.047041 | 4.068161  |
| C  | 7.624693  | 17.611025 | 5.157307  |
| C  | 8.114579  | 20.114877 | 8.712449  |
| C  | 8.798131  | 21.044137 | 7.761415  |
| C  | 10.935657 | 15.817929 | 4.515684  |
| C  | 8.019114  | 18.048486 | 10.003435 |
| C  | 11.583751 | 21.775542 | 3.829544  |
| C  | 13.188053 | 20.088282 | 8.104215  |
| C  | 9.850707  | 20.709871 | 1.926837  |
| C  | 13.363264 | 14.025223 | 7.193496  |
| C  | 20.471315 | 18.808642 | 8.369140  |
| C  | 12.916032 | 14.874706 | 3.984086  |
| C  | 15.355670 | 17.156815 | 4.602671  |
| C  | 15.124696 | 17.458593 | 3.156868  |
| C  | 18.124109 | 17.790844 | 7.155818  |
| C  | 18.648360 | 19.045886 | 6.787842  |
| C  | 11.526125 | 26.577587 | 8.133806  |
| C  | 8.623967  | 18.839906 | 9.022395  |
| C  | 11.549412 | 14.732155 | 3.820704  |
| C  | 19.807745 | 19.548185 | 7.384075  |
| C  | 18.809047 | 17.055892 | 8.143102  |
| C  | 6.964861  | 20.554255 | 9.396078  |
| C  | 13.322386 | 15.824654 | 8.798465  |
| C  | 11.131963 | 21.120972 | 1.542142  |
| C  | 16.565381 | 17.558369 | 5.191188  |
| C  | 10.028412 | 24.650914 | 7.989339  |



|   |           |           |           |
|---|-----------|-----------|-----------|
| C | 12.472645 | 13.296755 | 7.986925  |
| C | 11.184478 | 25.342646 | 7.576880  |
| C | 8.130022  | 14.041605 | 4.941183  |
| C | 7.219818  | 13.091166 | 4.451982  |
| C | 14.726600 | 17.976752 | 0.405992  |
| C | 9.560855  | 26.486146 | 9.534548  |
| C | 9.217672  | 25.254311 | 8.971364  |
| C | 15.898253 | 17.348444 | 0.842251  |
| C | 16.095088 | 17.094847 | 2.203174  |
| C | 12.444464 | 19.853940 | 9.453569  |
| C | 13.761975 | 18.359062 | 1.343691  |
| C | 7.274450  | 14.096127 | 2.276419  |
| C | 19.964773 | 17.560210 | 8.745968  |
| C | 12.002204 | 21.646568 | 2.502191  |
| C | 14.691435 | 19.750786 | 8.307470  |
| C | 6.779328  | 13.097081 | 3.123696  |
| C | 11.992496 | 13.835809 | 9.185564  |
| C | 15.295750 | 20.626390 | 9.426538  |
| C | 6.884729  | 18.504754 | 10.684018 |
| C | 10.720471 | 27.151951 | 9.122640  |
| C | 13.960435 | 18.105528 | 2.703431  |
| C | 14.545047 | 20.374099 | 10.749106 |
| C | 13.074838 | 21.595266 | 7.737048  |
| C | 6.353104  | 19.759500 | 10.369851 |
| C | 8.179192  | 15.070105 | 2.720310  |
| C | 12.428948 | 15.100063 | 9.593731  |
| C | 13.056111 | 20.728766 | 10.567097 |
| C | 13.679565 | 22.466684 | 8.856024  |
| C | 8.575380  | 13.972361 | 6.385333  |
| C | 12.927531 | 22.214756 | 10.178816 |
| C | 15.168651 | 22.114141 | 9.038512  |
| C | 5.820088  | 12.050953 | 2.604983  |
| C | 8.676189  | 16.120737 | 1.755054  |
| H | 6.356211  | 11.259070 | 2.045903  |
| H | 5.269966  | 11.557693 | 3.425334  |
| H | 5.078887  | 12.491832 | 1.913434  |
| H | 6.841944  | 12.323161 | 5.136622  |
| H | 6.939625  | 14.126161 | 1.233216  |
| H | 9.668805  | 13.833432 | 6.469952  |
| H | 8.332480  | 14.901225 | 6.931954  |
| H | 8.082774  | 13.135533 | 6.908371  |
| H | 9.775353  | 16.080348 | 1.646388  |
| H | 8.227633  | 15.980778 | 0.757072  |
| H | 8.426545  | 17.139718 | 2.102635  |
| H | 11.017111 | 13.960965 | 3.265026  |
| H | 13.710294 | 14.240732 | 3.591958  |
| H | 6.814456  | 16.969518 | 4.812771  |
| H | 6.638458  | 19.487776 | 5.838366  |
| H | 6.539246  | 21.531398 | 9.147205  |
| H | 5.459577  | 20.125163 | 10.886352 |
| H | 6.414795  | 17.882351 | 11.452521 |
| H | 8.447869  | 17.070643 | 10.246039 |

|   |           |           |           |
|---|-----------|-----------|-----------|
| H | 9.514244  | 18.472053 | 8.506170  |
| H | 8.797726  | 22.582902 | 9.257346  |
| H | 10.535809 | 23.666368 | 5.476086  |
| H | 11.846221 | 24.892824 | 6.831780  |
| H | 8.297932  | 24.758535 | 9.294502  |
| H | 8.913230  | 26.931017 | 10.297338 |
| H | 10.996700 | 28.111685 | 9.570511  |
| H | 12.434806 | 27.088048 | 7.798957  |
| H | 12.273859 | 22.178646 | 4.576131  |
| H | 13.011489 | 21.958392 | 2.216245  |
| H | 11.454654 | 21.032562 | 0.499254  |
| H | 9.160709  | 20.297058 | 1.184153  |
| H | 8.426377  | 20.524430 | 3.535809  |
| H | 13.207330 | 18.428051 | 3.424936  |
| H | 12.846574 | 18.863385 | 1.020394  |
| H | 14.565023 | 18.173853 | -0.659383 |
| H | 16.660762 | 17.041400 | 0.119213  |
| H | 17.003548 | 16.581235 | 2.533492  |
| H | 18.441101 | 16.068147 | 8.434429  |
| H | 20.480145 | 16.966412 | 9.508081  |
| H | 21.375242 | 19.204738 | 8.842395  |
| H | 20.192647 | 20.526107 | 7.077403  |
| H | 18.122456 | 19.651267 | 6.043871  |
| H | 12.147761 | 12.303632 | 7.659670  |
| H | 11.287826 | 13.268937 | 9.802951  |
| H | 12.061670 | 15.535087 | 10.529126 |
| H | 13.733692 | 13.589662 | 6.263685  |
| H | 13.645231 | 16.817464 | 9.119567  |
| H | 16.163863 | 16.273392 | 8.312377  |
| H | 17.282574 | 18.109522 | 4.577320  |
| H | 15.231470 | 19.910522 | 7.358132  |
| H | 14.799625 | 18.682025 | 8.554791  |
| H | 13.601733 | 21.773717 | 6.781794  |
| H | 12.015810 | 21.848687 | 7.579776  |
| H | 12.516804 | 18.784770 | 9.722927  |
| H | 11.374165 | 20.087475 | 9.323676  |
| H | 12.507319 | 20.538090 | 11.507803 |
| H | 13.345567 | 22.855030 | 10.978021 |
| H | 11.863335 | 22.494534 | 10.069083 |
| H | 13.571958 | 23.529243 | 8.569471  |
| H | 15.727803 | 22.312083 | 8.104085  |
| H | 15.619305 | 22.753386 | 9.820956  |
| H | 16.361124 | 20.360133 | 9.550589  |
| H | 14.985189 | 20.986540 | 11.558425 |
| H | 14.652374 | 19.316045 | 11.054584 |

**Table S-12.** Coordinates of optimized molecular structure for (<sup>Ar</sup>L)Co(py)(NAd) (**10-py**).

Singlet ( $S = 0$ )

|    |          |          |           |
|----|----------|----------|-----------|
| Co | 5.466741 | 8.573359 | 21.396388 |
|----|----------|----------|-----------|

|   |          |           |           |
|---|----------|-----------|-----------|
| N | 4.151207 | 7.186641  | 22.094531 |
| N | 4.769510 | 10.026735 | 22.666154 |
| N | 4.287682 | 9.174799  | 19.809787 |
| N | 7.078004 | 8.205058  | 21.000749 |
| C | 3.090792 | 7.478910  | 22.961028 |
| C | 4.051597 | 5.881292  | 21.793569 |
| C | 3.831072 | 9.774700  | 23.672356 |
| C | 5.015305 | 4.793923  | 19.680006 |
| C | 6.804003 | 3.331840  | 21.253507 |
| H | 7.465322 | 2.742060  | 21.891915 |
| C | 6.775696 | 3.083072  | 19.874437 |
| C | 5.304147 | 11.231671 | 22.939069 |
| C | 7.632408 | 12.074660 | 22.415502 |
| C | 5.777551 | 12.757036 | 20.967742 |
| C | 8.203650 | 11.454454 | 23.652689 |
| C | 6.064672 | 4.383045  | 23.356346 |
| C | 4.335200 | 12.959312 | 20.605374 |
| C | 3.841754 | 10.855523 | 24.610300 |
| H | 3.223351 | 10.929154 | 25.503724 |
| C | 5.986958 | 3.207740  | 24.130112 |
| H | 5.781442 | 2.253676  | 23.635420 |
| C | 4.023294 | 5.410101  | 18.745381 |
| C | 6.697319 | 13.478059 | 20.187227 |
| H | 6.321165 | 14.051128 | 19.337203 |
| C | 6.153774 | 3.241748  | 25.516913 |
| H | 6.087221 | 2.313997  | 26.094703 |
| C | 1.909382 | 8.691801  | 24.785273 |
| C | 5.971712 | 4.281658  | 21.865347 |
| C | 5.056306 | 5.034325  | 21.077377 |
| C | 6.254292 | 11.989740 | 22.069479 |
| C | 2.111507 | 8.043678  | 26.027840 |
| C | 5.887942 | 3.849969  | 19.108542 |
| H | 5.833215 | 3.687161  | 18.029223 |
| C | 2.987461 | 8.649195  | 23.734977 |
| C | 7.925974 | 10.131321 | 24.042947 |
| H | 7.275117 | 9.512639  | 23.423151 |
| C | 8.507967 | 12.820324 | 21.605401 |
| H | 9.564716 | 12.869636 | 21.880662 |
| C | 7.598702 | 1.997082  | 19.273656 |
| C | 8.068112 | 13.508177 | 20.468292 |
| C | 2.279817 | 6.311101  | 23.122150 |
| H | 1.382266 | 6.240166  | 23.734668 |
| C | 4.783750 | 11.757341 | 24.160466 |
| H | 5.079801 | 12.703187 | 24.614008 |
| C | 9.000174 | 14.257689 | 19.583248 |
| C | 7.114885 | 1.247304  | 18.183551 |
| H | 6.128700 | 1.474104  | 17.769549 |
| C | 3.946575 | 12.996303 | 19.251122 |
| H | 4.676203 | 12.743816 | 18.477576 |
| C | 4.454571 | 5.996163  | 17.539699 |
| H | 5.527775 | 6.103780  | 17.351064 |
| C | 6.309482 | 5.599290  | 24.020045 |

|   |           |           |           |
|---|-----------|-----------|-----------|
| H | 6.387368  | 6.521575  | 23.440917 |
| C | 2.893827  | 5.305604  | 22.406678 |
| H | 2.593749  | 4.260322  | 22.329976 |
| C | 2.965311  | 9.356965  | 19.923769 |
| H | 2.534078  | 9.147504  | 20.903486 |
| C | 8.499002  | 9.586137  | 25.195989 |
| H | 8.263822  | 8.553347  | 25.473808 |
| C | 4.862096  | 9.409678  | 18.619842 |
| H | 5.939555  | 9.240298  | 18.572883 |
| C | 3.372599  | 7.256205  | 26.302992 |
| H | 3.483427  | 6.404288  | 25.611648 |
| H | 3.377869  | 6.858426  | 27.332602 |
| H | 4.271800  | 7.883509  | 26.171694 |
| C | 2.647606  | 13.346493 | 18.872243 |
| H | 2.380618  | 13.373526 | 17.810171 |
| C | 9.653019  | 11.662547 | 25.614622 |
| H | 10.321454 | 12.275584 | 26.228466 |
| C | 1.690995  | 13.662416 | 19.840573 |
| H | 0.676169  | 13.947948 | 19.544839 |
| C | 10.263494 | 13.734913 | 19.246846 |
| H | 10.573329 | 12.770226 | 19.659780 |
| C | 0.721809  | 9.418430  | 24.549022 |
| C | 9.077356  | 12.208303 | 24.463488 |
| H | 9.299470  | 13.245635 | 24.195863 |
| C | 2.638689  | 5.293411  | 18.965580 |
| H | 2.276067  | 4.826780  | 19.882723 |
| C | 2.169283  | 9.780827  | 18.861377 |
| H | 1.096457  | 9.921289  | 19.016772 |
| C | 1.128054  | 8.158040  | 27.017775 |
| H | 1.293332  | 7.664340  | 27.982203 |
| C | 8.857263  | 1.649696  | 19.803200 |
| H | 9.272040  | 2.227436  | 20.634607 |
| C | 6.478380  | 5.632733  | 25.407980 |
| H | 6.677207  | 6.588485  | 25.903881 |
| C | -0.234963 | 9.504250  | 25.572554 |
| H | -1.152844 | 10.073932 | 25.389263 |
| C | 7.852830  | 0.188929  | 17.647683 |
| H | 7.445183  | -0.384514 | 16.808652 |
| C | 11.107384 | 14.410968 | 18.360914 |
| H | 12.076119 | 13.975138 | 18.095445 |
| C | 8.623004  | 15.492324 | 19.020627 |
| H | 7.662433  | 15.936271 | 19.298396 |
| C | 3.358426  | 13.286395 | 21.566151 |
| H | 3.625060  | 13.303113 | 22.622988 |
| C | 4.144766  | 9.837459  | 17.504219 |
| H | 4.667741  | 10.014978 | 16.560228 |
| C | 2.055509  | 13.626174 | 21.190092 |
| H | 1.325124  | 13.885897 | 21.962794 |
| C | -0.048462 | 8.892903  | 26.817339 |
| C | 1.719307  | 5.735114  | 18.010644 |
| H | 0.647746  | 5.613152  | 18.203232 |
| C | 9.365054  | 10.346285 | 25.988616 |

|   |           |           |           |
|---|-----------|-----------|-----------|
| H | 9.812909  | 9.915408  | 26.889833 |
| C | 6.402760  | 4.457200  | 26.162125 |
| H | 6.542944  | 4.487876  | 27.247773 |
| C | 9.594230  | 0.587233  | 19.272429 |
| H | 10.566533 | 0.332522  | 19.706518 |
| C | 9.464985  | 16.168979 | 18.134671 |
| H | 9.146054  | 17.125655 | 17.708456 |
| C | 3.536250  | 6.444696  | 16.586053 |
| H | 3.899536  | 6.902345  | 15.659742 |
| C | 9.095818  | -0.149559 | 18.192550 |
| H | 9.672931  | -0.982307 | 17.778097 |
| C | 0.458899  | 10.086663 | 23.215066 |
| H | 1.268415  | 10.783048 | 22.935934 |
| H | -0.488307 | 10.653322 | 23.235708 |
| H | 0.384172  | 9.339027  | 22.403050 |
| C | 2.766595  | 10.024628 | 17.623953 |
| H | 2.169327  | 10.359594 | 16.770645 |
| C | 10.709256 | 15.626961 | 17.794892 |
| H | 11.368702 | 16.152404 | 17.096484 |
| C | 2.162993  | 6.312383  | 16.815785 |
| H | 1.442912  | 6.657227  | 16.067035 |
| C | -1.069634 | 9.022578  | 27.923451 |
| H | -1.454817 | 8.035860  | 28.242712 |
| H | -1.932167 | 9.635058  | 27.609854 |
| H | -0.627066 | 9.496995  | 28.819472 |
| H | 9.794732  | 5.966591  | 18.000471 |
| H | 10.116991 | 8.444870  | 17.751895 |
| C | 9.824622  | 6.608414  | 18.899983 |
| H | 7.865360  | 7.501458  | 18.503408 |
| H | 11.629597 | 7.653331  | 18.251683 |
| C | 10.603365 | 7.900934  | 18.584727 |
| C | 8.381982  | 6.964055  | 19.320751 |
| H | 7.798600  | 6.050553  | 19.527074 |
| H | 11.540844 | 5.552986  | 19.746120 |
| C | 10.518737 | 5.849494  | 20.050610 |
| H | 9.966082  | 4.916599  | 20.274808 |
| C | 10.645227 | 8.793397  | 19.841331 |
| H | 8.689113  | 9.706403  | 19.456394 |
| C | 8.397630  | 7.864431  | 20.591590 |
| H | 11.199514 | 9.724457  | 19.616011 |
| C | 9.205568  | 9.154512  | 20.263809 |
| C | 10.566512 | 6.743553  | 21.305893 |
| H | 12.385797 | 7.796934  | 20.711987 |
| C | 11.342570 | 8.038449  | 20.992387 |
| C | 9.128966  | 7.099082  | 21.736074 |
| H | 8.560317  | 6.185354  | 21.984016 |
| H | 11.066949 | 6.202673  | 22.130341 |
| H | 9.212780  | 9.812294  | 21.149097 |
| H | 11.387836 | 8.680275  | 21.892571 |
| H | 9.143820  | 7.731781  | 22.641100 |

**Table S-13.** Coordinates of optimized molecular structure for (<sup>Ar</sup>L)Co(py)(NAd) (**10-py**).Triplet ( $S = 1$ )

|    |          |           |           |
|----|----------|-----------|-----------|
| Co | 5.413860 | 8.621601  | 21.238753 |
| N  | 4.260671 | 7.129519  | 22.096473 |
| N  | 4.871360 | 10.092717 | 22.590838 |
| N  | 4.247491 | 9.190359  | 19.529372 |
| N  | 7.004013 | 8.323347  | 20.404876 |
| C  | 3.252093 | 7.464712  | 23.013827 |
| C  | 4.125175 | 5.813514  | 21.848662 |
| C  | 3.979262 | 9.813416  | 23.632939 |
| C  | 4.977232 | 4.832884  | 19.647847 |
| C  | 6.801559 | 3.243863  | 21.043001 |
| H  | 7.475510 | 2.596081  | 21.607253 |
| C  | 6.760723 | 3.138156  | 19.645919 |
| C  | 5.366443 | 11.323039 | 22.834869 |
| C  | 7.637744 | 12.267277 | 22.252845 |
| C  | 5.722757 | 12.821941 | 20.820978 |
| C  | 8.261432 | 11.720640 | 23.501012 |
| C  | 6.050164 | 4.036831  | 23.254616 |
| C  | 4.265643 | 12.940813 | 20.478125 |
| C  | 3.978375 | 10.906581 | 24.555311 |
| H  | 3.386243 | 10.969445 | 25.466761 |
| C  | 6.007332 | 2.766527  | 23.864703 |
| H  | 5.853947 | 1.879056  | 23.243642 |
| C  | 3.910000 | 5.466372  | 18.814367 |
| C  | 6.592017 | 13.575019 | 20.013310 |
| H  | 6.174515 | 14.118580 | 19.163705 |
| C  | 6.135687 | 2.619380  | 25.247960 |
| H  | 6.092511 | 1.620644  | 25.695429 |
| C  | 2.122984 | 8.728360  | 24.829547 |
| C  | 5.972716 | 4.120718  | 21.761121 |
| C  | 5.061637 | 4.958383  | 21.057970 |
| C  | 6.259772 | 12.106274 | 21.930533 |
| C  | 2.378840 | 8.154215  | 26.097427 |
| C  | 5.844269 | 3.955745  | 18.972172 |
| H  | 5.760258 | 3.884770  | 17.885093 |
| C  | 3.169382 | 8.663745  | 23.747401 |
| C  | 8.010879 | 10.422839 | 23.985307 |
| H  | 7.330248 | 9.768236  | 23.441192 |
| C  | 8.461590 | 13.027741 | 21.402762 |
| H  | 9.521457 | 13.130195 | 21.648118 |
| C  | 7.594718 | 2.132245  | 18.930263 |
| C  | 7.964548 | 13.673594 | 20.265022 |
| C  | 2.444065 | 6.310330  | 23.263536 |
| H  | 1.578972 | 6.271924  | 23.923717 |
| C  | 4.869772 | 11.839792 | 24.066313 |
| H  | 5.140306 | 12.802296 | 24.499691 |
| C  | 8.840728 | 14.457236 | 19.352764 |
| C  | 7.100611 | 1.465361  | 17.791834 |

|   |           |           |           |
|---|-----------|-----------|-----------|
| H | 6.099487  | 1.701118  | 17.420957 |
| C | 3.862516  | 12.982838 | 19.127517 |
| H | 4.596439  | 12.786886 | 18.342022 |
| C | 4.229518  | 6.118239  | 17.608648 |
| H | 5.280235  | 6.286238  | 17.351844 |
| C | 6.218800  | 5.159024  | 24.085949 |
| H | 6.258419  | 6.156184  | 23.644709 |
| C | 3.008154  | 5.271705  | 22.554649 |
| H | 2.694710  | 4.227898  | 22.535310 |
| C | 2.918630  | 9.344489  | 19.583944 |
| H | 2.442466  | 9.113066  | 20.540763 |
| C | 8.637308  | 9.946337  | 25.140249 |
| H | 8.420025  | 8.931451  | 25.488724 |
| C | 4.881553  | 9.443635  | 18.376151 |
| H | 5.962324  | 9.273672  | 18.403591 |
| C | 3.662991  | 7.401165  | 26.366283 |
| H | 3.766031  | 6.523728  | 25.706104 |
| H | 3.705496  | 7.043766  | 27.409763 |
| H | 4.546949  | 8.039632  | 26.184928 |
| C | 2.542691  | 13.264464 | 18.765446 |
| H | 2.267503  | 13.300174 | 17.705825 |
| C | 9.791072  | 12.049315 | 25.385969 |
| H | 10.480150 | 12.701633 | 25.932607 |
| C | 1.576228  | 13.499743 | 19.746576 |
| H | 0.544024  | 13.731741 | 19.464195 |
| C | 10.113162 | 13.983281 | 18.981802 |
| H | 10.470699 | 13.030734 | 19.384297 |
| C | 0.913379  | 9.416679  | 24.591342 |
| C | 9.161663  | 12.524276 | 24.231919 |
| H | 9.362915  | 13.547019 | 23.900452 |
| C | 2.550557  | 5.276333  | 19.124704 |
| H | 2.275496  | 4.754579  | 20.042645 |
| C | 2.167190  | 9.769772  | 18.489716 |
| H | 1.085048  | 9.887638  | 18.588757 |
| C | 1.427354  | 8.309466  | 27.113446 |
| H | 1.633721  | 7.874307  | 28.097920 |
| C | 8.875197  | 1.775619  | 19.396945 |
| H | 9.298346  | 2.292936  | 20.262480 |
| C | 6.356965  | 5.012085  | 25.469567 |
| H | 6.505499  | 5.900187  | 26.091941 |
| C | -0.010637 | 9.543362  | 25.639699 |
| H | -0.945002 | 10.084949 | 25.455258 |
| C | 7.850488  | 0.476419  | 17.149901 |
| H | 7.434841  | -0.035318 | 16.275812 |
| C | 10.906666 | 14.693995 | 18.076388 |
| H | 11.883791 | 14.296365 | 17.783655 |
| C | 8.398857  | 15.675819 | 18.802593 |
| H | 7.429093  | 16.081049 | 19.106570 |
| C | 3.276496  | 13.180797 | 21.451744 |
| H | 3.547270  | 13.187503 | 22.507545 |
| C | 4.209784  | 9.876250  | 17.232554 |
| H | 4.771607  | 10.074848 | 16.315253 |

|   |           |           |           |
|---|-----------|-----------|-----------|
| C | 1.952470  | 13.449771 | 21.092059 |
| H | 1.213369  | 13.643574 | 21.876007 |
| C | 0.230540  | 9.011545  | 26.911655 |
| C | 1.545639  | 5.707073  | 18.254921 |
| H | 0.497166  | 5.523789  | 18.514530 |
| C | 9.532686  | 10.754829 | 25.847394 |
| H | 10.023803 | 10.379212 | 26.750766 |
| C | 6.314487  | 3.744141  | 26.058341 |
| H | 6.423421  | 3.631174  | 27.142255 |
| C | 9.625016  | 0.783957  | 18.758421 |
| H | 10.614328 | 0.520104  | 19.146096 |
| C | 9.191216  | 16.387277 | 17.898135 |
| H | 8.824598  | 17.331399 | 17.482417 |
| C | 3.225232  | 6.556947  | 16.741080 |
| H | 3.500520  | 7.068533  | 15.813113 |
| C | 9.115409  | 0.126656  | 17.633499 |
| H | 9.701814  | -0.652508 | 17.136062 |
| C | 0.598202  | 10.004890 | 23.231749 |
| H | 1.380155  | 10.708988 | 22.898117 |
| H | -0.364871 | 10.544103 | 23.246532 |
| H | 0.529943  | 9.214692  | 22.460916 |
| C | 2.824473  | 10.042482 | 17.288662 |
| H | 2.264027  | 10.381133 | 16.411391 |
| C | 10.446225 | 15.894537 | 17.524799 |
| H | 11.066234 | 16.447651 | 16.811734 |
| C | 1.878673  | 6.347664  | 17.056826 |
| H | 1.093811  | 6.684488  | 16.372353 |
| C | -0.759926 | 9.187269  | 28.039509 |
| H | -1.166563 | 8.216933  | 28.382646 |
| H | -1.612232 | 9.818234  | 27.734802 |
| H | -0.284284 | 9.662609  | 28.917586 |
| H | 10.381554 | 5.683827  | 18.700833 |
| H | 11.013819 | 8.110316  | 18.573739 |
| C | 10.146215 | 6.356857  | 19.545940 |
| H | 8.577552  | 7.429256  | 18.459246 |
| H | 12.155260 | 7.211834  | 19.603384 |
| C | 11.107396 | 7.561370  | 19.530675 |
| C | 8.696791  | 6.866426  | 19.403620 |
| H | 7.990828  | 6.017224  | 19.368108 |
| H | 11.338576 | 5.199622  | 20.968665 |
| C | 10.306226 | 5.589316  | 20.875819 |
| H | 9.627825  | 4.715131  | 20.891107 |
| C | 10.771165 | 8.498927  | 20.707951 |
| H | 9.189611  | 9.563420  | 19.624710 |
| C | 8.316751  | 7.806312  | 20.590642 |
| H | 11.451097 | 9.370726  | 20.694333 |
| C | 9.318548  | 9.006752  | 20.570201 |
| C | 9.980297  | 6.526356  | 22.056758 |
| H | 11.982818 | 7.393311  | 22.156960 |
| C | 10.936078 | 7.735242  | 22.039568 |
| C | 8.528066  | 7.025623  | 21.919206 |
| H | 7.832655  | 6.170192  | 21.941606 |



|   |           |          |           |
|---|-----------|----------|-----------|
| H | 10.092050 | 5.975965 | 23.009829 |
| H | 9.073507  | 9.697048 | 21.394439 |
| H | 10.715741 | 8.407097 | 22.890150 |
| H | 8.269311  | 7.684305 | 22.767336 |

**Table S-14.** Coordinates of optimized molecular structure for (<sup>Ar</sup>L)Co(py)(NAd) (**10-py**).

Quintet ( $S = 2$ )

|    |          |           |           |
|----|----------|-----------|-----------|
| Co | 5.398841 | 8.538821  | 21.394908 |
| N  | 4.181064 | 7.059414  | 22.163331 |
| N  | 4.785675 | 10.017850 | 22.766139 |
| N  | 4.326023 | 9.005770  | 19.556079 |
| N  | 7.075023 | 8.853056  | 20.848621 |
| C  | 3.109222 | 7.395663  | 22.999605 |
| C  | 4.007079 | 5.770468  | 21.806664 |
| C  | 3.816243 | 9.721902  | 23.733278 |
| C  | 4.840921 | 4.586869  | 19.705337 |
| C  | 6.827148 | 3.289653  | 21.176224 |
| H  | 7.552667 | 2.747960  | 21.786776 |
| C  | 6.660472 | 2.934441  | 19.830854 |
| C  | 5.303230 | 11.207715 | 23.099240 |
| C  | 7.636934 | 12.089295 | 22.712201 |
| C  | 5.853607 | 12.722400 | 21.154393 |
| C  | 8.146278 | 11.463575 | 23.972909 |
| C  | 6.341197 | 4.497282  | 23.258503 |
| C  | 4.426577 | 12.855154 | 20.716355 |
| C  | 3.780472 | 10.783914 | 24.700371 |
| H  | 3.126235 | 10.832095 | 25.569391 |
| C  | 5.390324 | 4.360037  | 24.285482 |
| H  | 4.353684 | 4.129105  | 24.035793 |
| C  | 3.801322 | 5.164053  | 18.793226 |
| C  | 6.797496 | 13.452243 | 20.414789 |
| H  | 6.457950 | 14.000718 | 19.533136 |
| C  | 5.760327 | 4.488345  | 25.628155 |
| H  | 5.003152 | 4.360533  | 26.408260 |
| C  | 1.882068 | 8.630459  | 24.777391 |
| C  | 6.029148 | 4.256373  | 21.811693 |
| C  | 4.990149 | 4.903823  | 21.081716 |
| C  | 6.284377 | 11.983894 | 22.289323 |
| C  | 2.099925 | 8.124917  | 26.080643 |
| C  | 5.686160 | 3.635381  | 19.109138 |
| H  | 5.540864 | 3.415145  | 18.049132 |
| C  | 2.994123 | 8.584226  | 23.761461 |
| C  | 7.846970 | 10.137912 | 24.341868 |
| H  | 7.230852 | 9.521108  | 23.686126 |
| C  | 8.540146 | 12.843860 | 21.942971 |
| H  | 9.581015 | 12.912039 | 22.269798 |
| C  | 7.425731 | 1.811439  | 19.221228 |
| C  | 8.150138 | 13.508318 | 20.773300 |
| C  | 2.232443 | 6.275782  | 23.104190 |

|   |           |           |           |
|---|-----------|-----------|-----------|
| H | 1.315093  | 6.239104  | 23.689495 |
| C | 4.734222  | 11.698684 | 24.317336 |
| H | 5.009505  | 12.631991 | 24.808131 |
| C | 9.122394  | 14.243127 | 19.921117 |
| C | 6.846903  | 1.011378  | 18.215686 |
| H | 5.828973  | 1.222561  | 17.877068 |
| C | 4.093673  | 12.779483 | 19.349830 |
| H | 4.867972  | 12.518060 | 18.624249 |
| C | 4.201315  | 5.781803  | 17.591327 |
| H | 5.267506  | 5.946337  | 17.403702 |
| C | 7.674378  | 4.762898  | 23.629504 |
| H | 8.434145  | 4.868762  | 22.850259 |
| C | 2.797222  | 5.257102  | 22.356533 |
| H | 2.430276  | 4.237151  | 22.239583 |
| C | 3.001530  | 8.837365  | 19.446223 |
| H | 2.495625  | 8.413127  | 20.317423 |
| C | 8.356884  | 9.584162  | 25.520260 |
| H | 8.105220  | 8.550704  | 25.780013 |
| C | 4.995277  | 9.509613  | 18.510288 |
| H | 6.069386  | 9.637318  | 18.664999 |
| C | 3.414456  | 7.477573  | 26.458890 |
| H | 3.738363  | 6.737889  | 25.708122 |
| H | 3.339697  | 6.968513  | 27.435639 |
| H | 4.224391  | 8.226742  | 26.530797 |
| C | 2.793627  | 13.032496 | 18.901262 |
| H | 2.566972  | 12.972010 | 17.831474 |
| C | 9.495488  | 11.655544 | 26.005975 |
| H | 10.134674 | 12.262160 | 26.656364 |
| C | 1.786421  | 13.365658 | 19.811021 |
| H | 0.770460  | 13.573929 | 19.459606 |
| C | 10.398421 | 13.711078 | 19.653521 |
| H | 10.683940 | 12.752175 | 20.096480 |
| C | 0.652193  | 9.239041  | 24.445504 |
| C | 8.981157  | 12.209670 | 24.830272 |
| H | 9.220758  | 13.247106 | 24.579089 |
| C | 2.425762  | 4.967484  | 19.008878 |
| H | 2.087971  | 4.470136  | 19.918779 |
| C | 2.293276  | 9.174189  | 18.292256 |
| H | 1.213321  | 9.012753  | 18.250820 |
| C | 1.085645  | 8.264956  | 27.036519 |
| H | 1.258288  | 7.877976  | 28.047387 |
| C | 8.724056  | 1.480067  | 19.656145 |
| H | 9.213413  | 2.093236  | 20.418441 |
| C | 8.044933  | 4.897989  | 24.970771 |
| H | 9.087833  | 5.111513  | 25.227178 |
| C | -0.335453 | 9.351919  | 25.436109 |
| H | -1.285579 | 9.833612  | 25.179569 |
| C | 7.534131  | -0.073891 | 17.666210 |
| H | 7.054206  | -0.683124 | 16.893102 |
| C | 11.283143 | 14.367044 | 18.793029 |
| H | 12.261309 | 13.923084 | 18.580385 |
| C | 8.773700  | 15.465699 | 19.316368 |

|   |           |           |           |
|---|-----------|-----------|-----------|
| H | 7.801249  | 15.915154 | 19.539297 |
| C | 3.401334  | 13.201796 | 21.616792 |
| H | 3.628512  | 13.306943 | 22.678452 |
| C | 4.372252  | 9.863562  | 17.312996 |
| H | 4.966361  | 10.271129 | 16.490109 |
| C | 2.098628  | 13.446857 | 21.171816 |
| H | 1.326215  | 13.723195 | 21.896393 |
| C | -0.135060 | 8.887954  | 26.741457 |
| C | 1.484187  | 5.360848  | 18.052574 |
| H | 0.421097  | 5.172649  | 18.238589 |
| C | 9.183488  | 10.338614 | 26.358550 |
| H | 9.583812  | 9.902373  | 27.279569 |
| C | 7.086569  | 4.760300  | 25.978929 |
| H | 7.373985  | 4.856903  | 27.031359 |
| C | 9.409085  | 0.388639  | 19.114896 |
| H | 10.412925 | 0.146390  | 19.478587 |
| C | 9.656852  | 16.122520 | 18.455919 |
| H | 9.360331  | 17.071153 | 17.996677 |
| C | 3.261876  | 6.179413  | 16.636238 |
| H | 3.601778  | 6.659128  | 15.712495 |
| C | 8.818792  | -0.394283 | 18.116696 |
| H | 9.356348  | -1.248520 | 17.693126 |
| C | 0.386991  | 9.763185  | 23.049750 |
| H | 1.179421  | 10.455186 | 22.715448 |
| H | -0.577217 | 10.298809 | 23.003431 |
| H | 0.350103  | 8.939694  | 22.312151 |
| C | 2.989863  | 9.699686  | 17.202900 |
| H | 2.462947  | 9.972938  | 16.282809 |
| C | 10.914663 | 15.572343 | 18.185492 |
| H | 11.606747 | 16.081638 | 17.507111 |
| C | 1.897854  | 5.964194  | 16.860296 |
| H | 1.161653  | 6.265109  | 16.107941 |
| C | -1.186025 | 9.070167  | 27.812077 |
| H | -1.439314 | 8.113310  | 28.305932 |
| H | -2.116225 | 9.494576  | 27.396763 |
| H | -0.831063 | 9.755172  | 28.605305 |
| H | 9.565486  | 5.943452  | 18.267549 |
| H | 9.860319  | 8.292216  | 17.422381 |
| C | 9.665800  | 6.777919  | 18.985813 |
| H | 7.683189  | 7.587170  | 18.543760 |
| H | 11.409735 | 7.609254  | 17.965130 |
| C | 10.415902 | 7.948138  | 18.316284 |
| C | 8.263489  | 7.250741  | 19.423912 |
| H | 7.696986  | 6.421756  | 19.886163 |
| H | 11.446296 | 5.918705  | 19.914678 |
| C | 10.451367 | 6.295557  | 20.221654 |
| H | 9.920082  | 5.449485  | 20.699357 |
| C | 10.561802 | 9.109940  | 19.319806 |
| H | 8.588373  | 9.960182  | 18.892259 |
| C | 8.368202  | 8.429330  | 20.441300 |
| H | 11.102709 | 9.947680  | 18.840630 |
| C | 9.162174  | 9.587047  | 19.761979 |

|   |           |           |           |
|---|-----------|-----------|-----------|
| C | 10.597125 | 7.458222  | 21.223693 |
| H | 12.365221 | 8.300592  | 20.253467 |
| C | 11.350784 | 8.625528  | 20.554251 |
| C | 9.198953  | 7.936515  | 21.664104 |
| H | 8.644403  | 7.124009  | 22.165683 |
| H | 11.159735 | 7.114772  | 22.111994 |
| H | 9.243757  | 10.428153 | 20.473845 |
| H | 11.477357 | 9.455179  | 21.275720 |
| H | 9.288988  | 8.760778  | 22.392674 |
